# Supplementary material for: Computational insights into the reactivity for the [2+5] cycloaddition reactions of norbornene-linked group 14 element/P-based and Si/group 15 element-based frustrated Lewis pairs with benzaldehyde
Source: Royal Society of Chemistry journal article supplement (doi:10.1039/d2cp05135d), 2023-01-01
Supplement: d2cp05135d1.pdf [file d2cp05135d1.pdf]

# Supporting Information

## Reactivity for the [2 + 5] Cycloaddition Reactions of Norbornene-Linked Group 14 Element/P-Based and Si/Group 15 Element-Based Frustrated Lewis Pairs with Benzaldehyde: Insights from Computational Study

Zheng-Feng Zhang<sup>1</sup> and Ming-Der Su<sup>1,2\*</sup>

<sup>1</sup>Department of Applied Chemistry, National Chiayi University, Chiayi 60004, Taiwan

<sup>2</sup>Department of Medicinal and Applied Chemistry, Kaohsiung Medical University, Kaohsiung 80708, Taiwan

\*E-mail: [midesu@mail.ncyu.edu.tw](mailto:midesu@mail.ncyu.edu.tw)

**Table S1.** Results of EDA-NOCV at the ZORA-B3LYP-D3(BJ)/TZ2P//B3LYP-D3(BJ)/def2-TZVP level of **Si/G15-TS** using two different models. Energy values are in kcal/mol.

| Fragments                        | <u>Si/N-TS</u> |                 | <u>Si/P-TS</u> |                 | <u>Si/As-TS</u> |                 | <u>Si/Sb-TS</u> |                 | <u>Si/Bi-TS</u> |                 |
|----------------------------------|----------------|-----------------|----------------|-----------------|-----------------|-----------------|-----------------|-----------------|-----------------|-----------------|
|                                  | Si/N-Rea (S)   | Si/N-Rea (T)    | Si/P-Rea (S)   | Si/P-Rea (T)    | Si/As-Rea (S)   | Si/As-Rea (T)   | Si/Sb-Rea (S)   | Si/Sb-Rea (T)   | Si/Bi-Rea (S)   | Si/Bi-Rea (T)   |
|                                  | +              | +               | +              | +               | +               | +               | +               | +               | +               | +               |
|                                  | Ph(H)C=O (S)   | Ph(H)C=O (T)    | Ph(H)C=O (S)   | Ph(H)C=O (T)    | Ph(H)C=O (S)    | Ph(H)C=O (T)    | Ph(H)C=O (S)    | Ph(H)C=O (T)    | Ph(H)C=O (S)    | Ph(H)C=O (T)    |
| $\Delta E_{\text{INT}}^{(a)}$    | -24.0          | -139.0          | -28.0          | -130.4          | -30.3           | -133.2          | -24.4           | -130.0          | -19.8           | -128.2          |
| $\Delta E_{\text{Pauli}}$        | 80.8           | 132.3           | 143.5          | 204.7           | 130.3           | 179.5           | 104.8           | 131.1           | 56.8            | 67.1            |
| $\Delta E_{\text{Elstat}}^{(b)}$ | -51.9 (49.5 %) | -63.0 (23.2 %)  | -81.5 (47.5 %) | -101.5 (30.3 %) | -77.6 (48.3 %)  | -88.9 (28.4 %)  | -63.5 (49.1 %)  | -64.4 (24.7 %)  | -38.3 (50.0 %)  | -32.0 (16.4 %)  |
| $\Delta E_{\text{Orb}}^{(b)}$    | -40.2 (38.4 %) | -195.6 (72.1 %) | -78.8 (46.0 %) | -222.5 (66.4 %) | -73.7 (45.9 %)  | -214.5 (68.6 %) | -56.5 (43.7 %)  | -187.4 (71.8 %) | -29.3 (38.3 %)  | -154.3 (79.0 %) |
| $\Delta E_{\text{Orb}(1)}^{(c)}$ | -21.6 (53.7 %) | -175.5 (89.7 %) | -46.4 (58.9 %) | -185.5 (83.4 %) | -43.0 (58.4 %)  | -180.8 (84.3 %) | -32.7 (57.9 %)  | -160.4 (85.6 %) | -16.2 (55.2 %)  | -141.0 (91.3 %) |
| $\Delta E_{\text{Orb}(2)}^{(c)}$ | -6.5 (16.3 %)  | -8.4 (4.3 %)    | -10.5 (13.4 %) | -18.7 (8.4 %)   | -10.4 (14.1 %)  | -18.2 (8.5 %)   | -7.8 (13.8 %)   | -15.8 (8.4 %)   | -4.1 (14.1 %)   | -5.9 (3.8 %)    |
| $\Delta E_{\text{Rest}}^{(c)}$   | -12.1 (30.0 %) | -11.8 (6.0 %)   | -21.9 (27.7 %) | -18.3 (8.2 %)   | -20.3 (27.5 %)  | -15.5 (7.2 %)   | -16.0 (28.3 %)  | -11.3 (6.0 %)   | -9.0 (30.8 %)   | -7.5 (4.9 %)    |
| $\Delta E_{\text{Disper}}^{(b)}$ | -12.7 (12.1 %) | -12.7 (4.7 %)   | -11.2 (6.5 %)  | -11.2 (3.3 %)   | -9.3 (5.8 %)    | -9.3 (3.0 %)    | -9.3 (7.2 %)    | -9.3 (3.5 %)    | -19.8 (11.7 %)  | -9.0 (4.6 %)    |

(a)  $\Delta E_{\text{INT}} = \Delta E_{\text{Elstat}} + \Delta E_{\text{Pauli}} + \Delta E_{\text{Orb}} + \Delta E_{\text{Disper}}$ .

(b) The values in parentheses offer the percentage contribution to the total attractive interactions ( $\Delta E_{\text{Elstat}} + \Delta E_{\text{Orb}} + \Delta E_{\text{Disper}}$ ).

(c) The values in parentheses offer the percentage contribution to the total orbital interactions ( $\Delta E_{\text{Orb}}$ ).

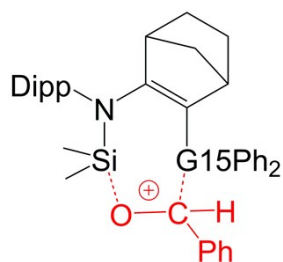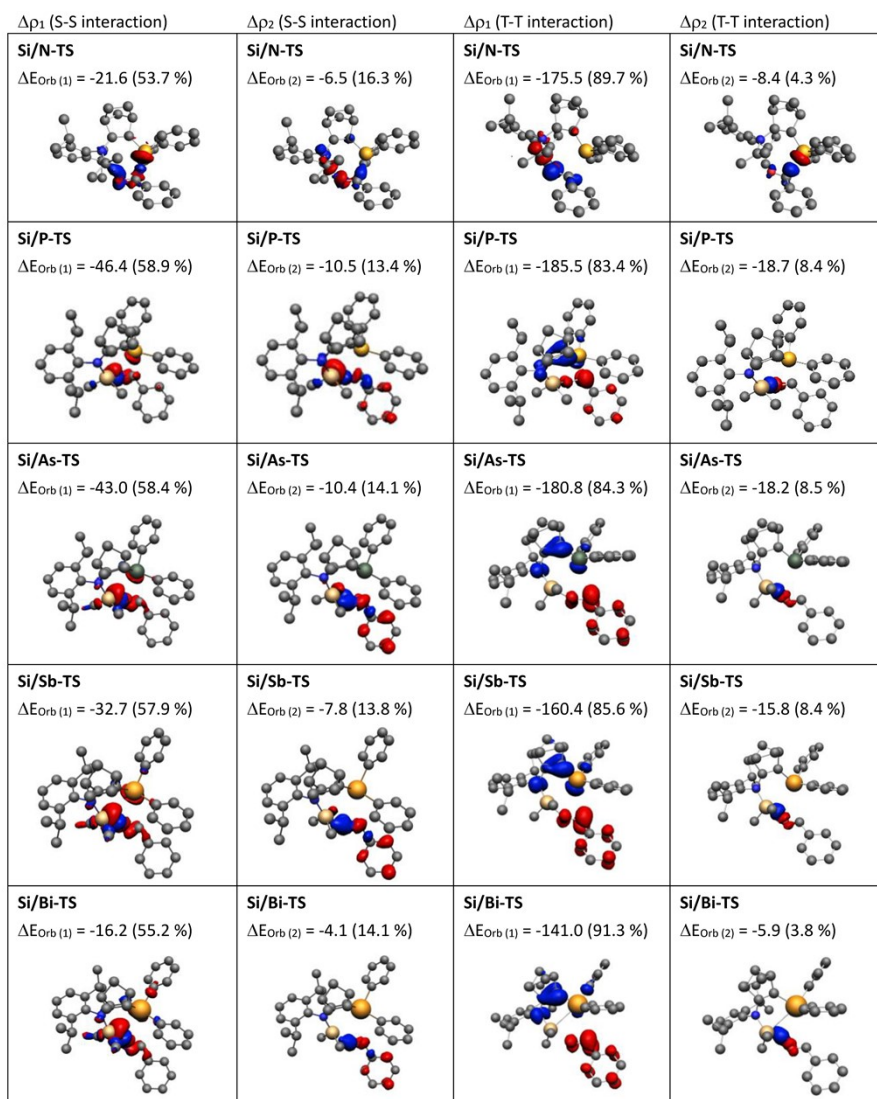

**Figure S1:** Plots of deformation densities,  $\Delta\rho(r)$ , of the pair-wise orbital interactions in **Si/G15-TS** at the ZORA-B3LYP-D3(BJ)/TZ2P//B3LYP-D3(BJ)/def2-TZVP level. Also see Table 2. The contour value is  $|\Delta\rho| = 0.002$  a.u. The associated orbital interaction energies are given in kcal/mol. The color code of the charge flow is red/blue.



C/P-Rea

---

|   |             |             |             |
|---|-------------|-------------|-------------|
| C | -0.50488200 | -0.15965400 | 0.50196600  |
| H | -0.99962800 | 0.81436800  | 0.42819200  |
| C | 0.83890400  | -0.25718000 | -0.22419000 |
| C | 1.08904000  | -1.58662200 | -0.31707600 |
| C | -0.25348300 | -0.62534500 | 1.97351500  |
| H | -1.15172200 | -0.43945500 | 2.57937400  |
| H | 0.57229700  | -0.06938900 | 2.43678800  |
| C | 0.02489000  | -2.14825200 | 1.81882300  |
| H | 1.00412600  | -2.45769300 | 2.21342000  |
| H | -0.73566700 | -2.75532900 | 2.33060500  |
| C | -0.08117000 | -2.35753800 | 0.27361300  |
| H | -0.17891100 | -3.39649400 | -0.05336900 |
| C | -1.23314900 | -1.39366600 | -0.07521300 |
| H | -1.41408100 | -1.32371500 | -1.15759300 |
| H | -2.17324400 | -1.63106800 | 0.44452200  |
| N | 2.26420700  | -2.24380800 | -0.80601700 |
| P | 1.90052600  | 1.15182400  | -0.76710600 |
| C | 1.40557700  | 2.38848100  | 0.51116800  |
| C | 0.75331200  | 4.19067300  | 2.56821000  |
| C | 2.04700000  | 2.31278200  | 1.76060700  |
| C | 0.45070300  | 3.39365700  | 0.29775200  |
| C | 0.12937400  | 4.28934000  | 1.32204500  |
| C | 1.71569500  | 3.19956700  | 2.78608500  |
| H | 2.81921300  | 1.55866200  | 1.93492500  |
| H | -0.04337300 | 3.48466700  | -0.67064300 |
| H | -0.61344800 | 5.07010400  | 1.14240700  |
| H | 2.21880800  | 3.12617100  | 3.75310400  |
| H | 0.49884300  | 4.89166800  | 3.36610300  |
| C | 1.02009100  | 1.72152500  | -2.28037700 |
| C | -0.14134600 | 2.72832200  | -4.63406000 |
| C | 1.81469000  | 2.33564700  | -3.26326400 |
| C | -0.36351100 | 1.60722200  | -2.49760900 |
| C | -0.93897800 | 2.10896100  | -3.66647500 |

|   |             |             |                        |
|---|-------------|-------------|------------------------|
| C | 1.23705900  | 2.83985300  | -4.43159700            |
| H | 2.89364200  | 2.42163300  | -3.10968300            |
| H | -1.00190300 | 1.13059300  | -1.75430600            |
| H | -2.01602400 | 2.01533600  | -3.82334600            |
| H | 1.86561500  | 3.32003300  | -5.18506700            |
| H | -0.59429000 | 3.12103800  | -5.54701000            |
| C | 2.00826300  | -3.30927700 | -1.78143100            |
| C | 1.49858000  | -5.31539600 | -3.60977600            |
| C | 1.77687100  | -2.94731200 | -3.12120700            |
| C | 1.98534300  | -4.64295700 | -1.31969800            |
| C | 1.72190000  | -5.63629800 | -2.27212500            |
| C | 1.52768900  | -3.98663500 | -4.02743900            |
| H | 1.69414900  | -6.68137400 | -1.95923500            |
| H | 1.35730900  | -3.74862500 | -5.07840400            |
| H | 1.30102200  | -6.10926100 | -4.33313600            |
| C | 1.84384400  | -1.50918100 | -3.60961200            |
| H | 1.87864300  | -0.84890200 | -2.73446000            |
| C | 3.13033200  | -1.25581100 | -4.41239100            |
| H | 4.03172900  | -1.49138400 | -3.82515700            |
| H | 3.18621300  | -0.19771500 | -4.71059800            |
| H | 3.15841100  | -1.86886400 | -5.32715100            |
| C | 0.59879000  | -1.11920700 | -4.41513300            |
| H | -0.31990900 | -1.27108600 | -3.82844600            |
| H | 0.51235600  | -1.70797700 | -5.34177300            |
| H | 0.64967000  | -0.05937200 | -4.69793100            |
| C | 2.24456900  | -5.04896800 | 0.12751300             |
| H | 2.34048100  | -4.13662800 | 0.73573000             |
| C | 3.56032500  | -5.83698400 | 0.25605300             |
| H | 4.41692100  | -5.28885700 | -0.16109300            |
| H | 3.49581500  | -6.79704500 | -0.27863900            |
| H | 3.77520800  | -6.05860100 | 1.31273900             |
| C | 1.08298800  | -5.86443100 | 0.71890600             |
| H | 0.12247800  | -5.33570100 | 0.63912700             |
| H | 1.26915500  | -6.07219900 | 1.78361800             |
| H | 0.97350100  | -6.83331200 | 0.20882500             |
| C | 3.48035000  | -2.00504100 | -0.37412700            |
| C |             | 3.75223300  | -1.12428800 0.79080300 |

|   |            |             |             |
|---|------------|-------------|-------------|
| C | 4.66476300 | -2.59752000 | -1.05468800 |
| H | 5.23284600 | -3.21346300 | -0.34049600 |
| H | 4.41472300 | -3.19321300 | -1.93695900 |
| H | 5.33127800 | -1.76652200 | -1.34320200 |
| H | 4.61776200 | -1.51222700 | 1.34653700  |
| H | 4.01126800 | -0.11815500 | 0.41715500  |
| H | 2.88279800 | -1.01918300 | 1.44949400  |

---

Si/P-Rea

---

|   |             |             |             |
|---|-------------|-------------|-------------|
| C | -1.28122900 | -0.29331200 | 0.31216900  |
| H | -1.79328700 | 0.67671400  | 0.30793400  |
| C | 0.12800300  | -0.30660700 | -0.26750700 |
| C | 0.43045900  | -1.61716100 | -0.56513100 |
| C | -1.20607300 | -0.98753800 | 1.70662300  |
| H | -2.18241200 | -0.94187700 | 2.21116400  |
| H | -0.47186400 | -0.50312800 | 2.36423200  |
| C | -0.82670100 | -2.45409800 | 1.34173100  |
| H | 0.13408800  | -2.77378900 | 1.76793500  |
| H | -1.58915700 | -3.16882700 | 1.68270700  |
| C | -0.78977400 | -2.44453100 | -0.22754100 |
| H | -0.83655700 | -3.43365400 | -0.69698900 |
| C | -1.91502800 | -1.42753300 | -0.53094500 |
| H | -1.99739700 | -1.17844500 | -1.59794000 |
| H | -2.89554900 | -1.75392300 | -0.15388200 |
| N | 1.66972100  | -2.06317400 | -0.94482900 |
| P | 1.44084400  | 0.83321100  | -0.52743300 |
| C | 1.68115300  | 2.01026400  | 0.82716700  |
| C | 2.01698200  | 3.76707900  | 2.97581200  |
| C | 1.84136800  | 1.50660100  | 2.13036300  |
| C | 1.67928500  | 3.39549900  | 0.60525700  |
| C | 1.84871400  | 4.26858600  | 1.68312400  |
| C | 2.01039700  | 2.38536900  | 3.19892500  |
| H | 1.82128400  | 0.43056000  | 2.31095500  |
| H | 1.53745000  | 3.79558400  | -0.39954200 |

|   |             |             |             |            |
|---|-------------|-------------|-------------|------------|
| H | 1.84368000  | 5.34659500  | 1.50934400  |            |
| H | 2.13294800  | 1.99229000  | 4.21026700  |            |
| H | 2.14826100  | 4.45368100  | 3.81479400  |            |
| C | 1.27464500  | 1.71079200  | -2.10719000 |            |
| C | 1.10377100  | 2.87968300  | -4.63834200 |            |
| C | 2.35372500  | 2.45897100  | -2.60857700 |            |
| C | 0.11769800  | 1.53815900  | -2.87987800 |            |
| C | 0.03423500  | 2.12821800  | -4.14310200 |            |
| C | 2.26292400  | 3.04479000  | -3.87140800 |            |
| H | 3.26584200  | 2.58119100  | -2.01851300 |            |
| H | -0.70532100 | 0.93192600  | -2.49750000 |            |
| H | -0.86865900 | 1.99781200  | -4.74330300 |            |
| H | 3.10009600  | 3.62719100  | -4.26177200 |            |
| H | 1.03727000  | 3.33621600  | -5.62819200 |            |
| C | 1.83272700  | -3.28462500 | -1.69594800 |            |
| C | 2.19034700  | -5.61496900 | -3.17711100 |            |
| C | 1.58298300  | -3.26069700 | -3.08890200 |            |
| C | 2.25801300  | -4.45733300 | -1.03776300 |            |
| C | 2.43182200  | -5.61764800 | -1.80544000 |            |
| C | 1.76751100  | -4.44640700 | -3.81014400 |            |
| H | 2.75722700  | -6.53940900 | -1.31894500 |            |
| H | 1.57718500  | -4.45744800 | -4.88496000 |            |
| H | 2.33016000  | -6.52947200 | -3.75765400 |            |
| C | 1.08687900  | -2.00881900 | -3.80008800 |            |
| H | 1.21264300  | -1.15891900 | -3.11607100 |            |
| C | 1.88001200  | -1.68610900 | -5.07380600 |            |
| H | 2.96362100  | -1.66446200 | -4.88544700 |            |
| H | 1.57910500  | -0.70225900 | -5.46698300 |            |
| H | 1.69676500  | -2.42633500 | -5.86764800 |            |
| C | -0.41503400 | -2.11748700 | -4.10816100 |            |
| H | -0.99880300 | -2.33179300 | -3.20181600 |            |
| H | -0.61030700 | -2.92961700 | -4.82588500 |            |
| H | -0.79073200 | -1.17992900 | -4.54815200 |            |
| C | 2.50700200  | -4.49993000 | 0.46152700  |            |
| H | 2.31644700  | -3.49086900 | 0.85331200  |            |
| C | 3.96456300  | -4.86112400 | 0.78459700  |            |
| H |             | 4.67181400  | -4.19360800 | 0.26754800 |



|    |            |             |             |
|----|------------|-------------|-------------|
| H  | 4.20159700 | -5.89015600 | 0.47268500  |
| H  | 4.15316200 | -4.79120800 | 1.86739300  |
| C  | 1.52896600 | -5.45424600 | 1.16442300  |
| H  | 0.48334200 | -5.19050200 | 0.94555800  |
| H  | 1.66969700 | -5.41946000 | 2.25627900  |
| H  | 1.68372400 | -6.49558500 | 0.84182700  |
| Si | 2.98745000 | -0.87224600 | -0.72941700 |
| C  | 3.90682400 | -1.09726600 | 0.87702800  |
| H  | 4.47260000 | -0.18681200 | 1.13050600  |
| H  | 4.62180400 | -1.92895800 | 0.77865200  |
| H  | 3.22710100 | -1.33175600 | 1.70831000  |
| C  | 4.08524800 | -0.71116500 | -2.21885600 |
| H  | 4.94470200 | -0.06088600 | -1.99362900 |
| H  | 3.54649700 | -0.30179900 | -3.08362700 |
| H  | 4.47205000 | -1.70651400 | -2.49253700 |

---

Ge/P-Rea

---

|   |             |             |              |
|---|-------------|-------------|--------------|
| C | -1.27584400 | -0.26990400 | 0.25308000   |
| H | -1.78041100 | 0.70408600  | 0.23694700   |
| C | 0.13908800  | -0.29533000 | -0.31529300  |
| C | 0.43874500  | -1.61446100 | -0.60335300  |
| C | -1.21723300 | -0.95308500 | 1.65262400   |
| H | -2.19651800 | -0.89744300 | 2.15071300   |
| H | -0.48300200 | -0.46937700 | 2.31094600   |
| C | -0.84557100 | -2.42466800 | 1.29953400   |
| H | 0.10958400  | -2.74830200 | 1.73507000   |
| H | -1.61565700 | -3.13190000 | 1.63915800   |
| C | -0.79668900 | -2.42582000 | -0.26901600  |
| H | -0.84777200 | -3.41839800 | -0.73081600  |
| C | -1.91140400 | -1.40316800 | -0.58818900  |
| H | -1.98377900 | -1.15911900 | -1.65702800  |
| H | -2.89721400 | -1.72090500 | -0.21735000  |
| N | 1.66106700  | -2.08837300 | -0.96238300  |
| P | 1.42642400  | 0.87019500  | - 0.53625900 |

|   |             |             |              |
|---|-------------|-------------|--------------|
| C | 1.64455200  | 2.00440200  | 0.85802300   |
| C | 1.91918600  | 3.68073600  | 3.07809400   |
| C | 1.89408300  | 1.45542300  | 2.12855300   |
| C | 1.52259500  | 3.39355300  | 0.70483300   |
| C | 1.66175400  | 4.22642500  | 1.81840200   |
| C | 2.03266700  | 2.29416400  | 3.23291600   |
| H | 1.96693500  | 0.37366600  | 2.25581300   |
| H | 1.31092800  | 3.82653600  | -0.27372500  |
| H | 1.56314100  | 5.30730500  | 1.69874200   |
| H | 2.22580900  | 1.86625700  | 4.21878400   |
| H | 2.02711600  | 4.33608200  | 3.94494100   |
| C | 1.27044400  | 1.79554300  | -2.08949300  |
| C | 1.12769700  | 3.02774200  | -4.59254200  |
| C | 2.30604900  | 2.64709900  | -2.51215900  |
| C | 0.17308900  | 1.55114400  | -2.92744800  |
| C | 0.10299300  | 2.17328200  | -4.17627100  |
| C | 2.22880300  | 3.26392200  | -3.76093300  |
| H | 3.17309000  | 2.82718200  | -1.87109500  |
| H | -0.61342400 | 0.86711200  | -2.60362700  |
| H | -0.75451300 | 1.98776800  | -4.82646700  |
| H | 3.03132500  | 3.92751300  | -4.08972200  |
| H | 1.07210300  | 3.50990500  | -5.57084900  |
| C | 1.82915700  | -3.32217800 | -1.68179100  |
| C | 2.20719400  | -5.68747900 | -3.10549800  |
| C | 1.58601300  | -3.33507200 | -3.07712900  |
| C | 2.26304600  | -4.47655700 | -0.99579100  |
| C | 2.44555900  | -5.65440500 | -1.73360900  |
| C | 1.77993100  | -4.53713200 | -3.76827100  |
| H | 2.77556100  | -6.56173100 | -1.22356200  |
| H | 1.59315700  | -4.57608000 | -4.84301900  |
| H | 2.35350700  | -6.61526800 | -3.66289700  |
| C | 1.08436800  | -2.10382700 | -3.82051100  |
| H | 1.22150200  | -1.23323700 | -3.16406000  |
| C | 1.85832100  | -1.82376600 | -5.11594800  |
| H | 2.94461000  | -1.79683200 | -4.94654400  |
| H | 1.55215200  | -0.85300300 | -5.53680900  |
| H | 1.66086200  | -2.58833900 | - 5.88279500 |

|    |             |             |             |
|----|-------------|-------------|-------------|
| C  | -0.42189900 | -2.21835500 | -4.10580100 |
| H  | -0.99466500 | -2.40685800 | -3.18728600 |
| H  | -0.62609800 | -3.05010900 | -4.79813700 |
| H  | -0.80293500 | -1.29331300 | -4.56759200 |
| C  | 2.51075400  | -4.47824600 | 0.50409800  |
| H  | 2.32506000  | -3.45651900 | 0.86516100  |
| C  | 3.96552500  | -4.83878700 | 0.83982800  |
| H  | 4.67731600  | -4.19295400 | 0.30224500  |
| H  | 4.19585100  | -5.87903300 | 0.56196100  |
| H  | 4.15406600  | -4.73544500 | 1.92002100  |
| C  | 1.52638800  | -5.40718000 | 1.23179800  |
| H  | 0.48264200  | -5.14446800 | 1.00335300  |
| H  | 1.66506000  | -5.34322500 | 2.32265500  |
| H  | 1.67668000  | -6.45768800 | 0.93786900  |
| Ge | 3.06888000  | -0.81383700 | -0.80290100 |
| C  | 4.09064900  | -1.10176500 | 0.83154000  |
| H  | 4.61420200  | -0.17573600 | 1.11064000  |
| H  | 4.83251700  | -1.89446700 | 0.66013600  |
| H  | 3.42942300  | -1.40791900 | 1.65272900  |
| C  | 4.09920100  | -0.66000400 | -2.44118100 |
| H  | 5.03115100  | -0.11116800 | -2.24477400 |
| H  | 3.52182100  | -0.14048700 | -3.21617500 |
| H  | 4.34578400  | -1.67275600 | -2.79346400 |

---

Sn/P-Rea

---

|   |             |             |             |
|---|-------------|-------------|-------------|
| C | -1.19823900 | -0.18251100 | 0.18523500  |
| H | -1.66873300 | 0.80850500  | 0.16049600  |
| C | 0.21584200  | -0.25626400 | -0.38634200 |
| C | 0.47599900  | -1.59086800 | -0.66543900 |
| C | -1.16004100 | -0.85260900 | 1.59059300  |
| H | -2.13467800 | -0.75874800 | 2.09243700  |
| H | -0.40568000 | -0.38899500 | 2.24089400  |
| C | -0.84080200 | -2.33880200 | 1.24808000  |
| H | 0.10214400  | -2.69211000 | 1.68649200  |

|   |             |             |              |
|---|-------------|-------------|--------------|
| H | -1.63514000 | -3.01598900 | 1.59339500   |
| C | -0.79306100 | -2.35305100 | -0.31963700  |
| H | -0.87814200 | -3.34755200 | -0.77224800  |
| C | -1.87322200 | -1.29826600 | -0.64584700  |
| H | -1.94045000 | -1.05887200 | -1.71611200  |
| H | -2.86837400 | -1.58055600 | -0.27081400  |
| N | 1.66122700  | -2.13614600 | -1.02147500  |
| P | 1.48209900  | 0.93668700  | -0.55921600  |
| C | 1.62515800  | 2.03246400  | 0.87786700   |
| C | 1.75365100  | 3.62731800  | 3.17071500   |
| C | 2.01618500  | 1.47058700  | 2.10619400   |
| C | 1.29198200  | 3.39301300  | 0.80315700   |
| C | 1.35873000  | 4.18534100  | 1.95271800   |
| C | 2.08048100  | 2.26825200  | 3.24734200   |
| H | 2.25897200  | 0.40750300  | 2.17348900   |
| H | 0.97495700  | 3.83381900  | -0.14319200  |
| H | 1.09610900  | 5.24366700  | 1.89411300   |
| H | 2.38448400  | 1.83017500  | 4.20028400   |
| H | 1.80505200  | 4.25102600  | 4.06564900   |
| C | 1.30820500  | 1.91962600  | -2.07727400  |
| C | 1.14610100  | 3.25970900  | -4.52410900  |
| C | 2.25874600  | 2.90277800  | -2.40313700  |
| C | 0.28786600  | 1.59885900  | -2.98450500  |
| C | 0.20761600  | 2.27468900  | -4.20480400  |
| C | 2.17134300  | 3.57284300  | -3.62347300  |
| H | 3.06422100  | 3.14808400  | -1.70583000  |
| H | -0.43216000 | 0.81782500  | -2.73255600  |
| H | -0.59129100 | 2.02978400  | -4.90791300  |
| H | 2.90620700  | 4.34035600  | -3.87552600  |
| H | 1.08227900  | 3.78509400  | -5.47941200  |
| C | 1.76270300  | -3.40816500 | -1.67546200  |
| C | 2.02196400  | -5.85923000 | -2.98190400  |
| C | 1.53456600  | -3.47673600 | -3.07246300  |
| C | 2.13192700  | -4.55121400 | -0.93322000  |
| C | 2.25477300  | -5.77170500 | -1.61132400  |
| C | 1.66565600  | -4.71991100 | -3.70321000  |
| H | 2.53397800  | -6.66928300 | - 1.05553700 |

|    |             |             |             |
|----|-------------|-------------|-------------|
| H  | 1.48630900  | -4.80052000 | -4.77686200 |
| H  | 2.11934900  | -6.81981700 | -3.49245000 |
| C  | 1.11737600  | -2.25264900 | -3.87779000 |
| H  | 1.33475100  | -1.36192900 | -3.26995600 |
| C  | 1.88706800  | -2.10697100 | -5.19735800 |
| H  | 2.97526200  | -2.15528300 | -5.04497600 |
| H  | 1.64979300  | -1.14107200 | -5.67054800 |
| H  | 1.61731800  | -2.89518200 | -5.91672900 |
| C  | -0.39816200 | -2.26087600 | -4.13560100 |
| H  | -0.96723700 | -2.34336200 | -3.19970200 |
| H  | -0.68036100 | -3.11567700 | -4.77019000 |
| H  | -0.71234000 | -1.33896400 | -4.65114600 |
| C  | 2.39128200  | -4.48758100 | 0.56351100  |
| H  | 2.20876100  | -3.44984400 | 0.87946200  |
| C  | 3.85216100  | -4.82927300 | 0.89435200  |
| H  | 4.55352900  | -4.19575000 | 0.32904100  |
| H  | 4.08444600  | -5.87608200 | 0.64397700  |
| H  | 4.05416400  | -4.69174000 | 1.96850500  |
| C  | 1.41930400  | -5.38276400 | 1.34658200  |
| H  | 0.37231000  | -5.13677800 | 1.11455600  |
| H  | 1.56750300  | -5.26204400 | 2.43137900  |
| H  | 1.57223900  | -6.44661300 | 1.10721500  |
| Sn | 3.32062900  | -0.81657300 | -0.89203200 |
| C  | 4.43285100  | -1.19274300 | 0.91441500  |
| H  | 4.79898800  | -0.23696400 | 1.31428000  |
| H  | 5.28249100  | -1.85224800 | 0.69397300  |
| H  | 3.76927400  | -1.67592600 | 1.64340600  |
| C  | 4.30998700  | -0.67465000 | -2.79092800 |
| H  | 5.29297800  | -0.20154300 | -2.66457900 |
| H  | 3.68661800  | -0.08423400 | -3.47469300 |
| H  | 4.43269800  | -1.69321400 | -3.18464000 |

---

**Pb/P-Rea**

---

|   |             |             |            |
|---|-------------|-------------|------------|
| C | -1.16827200 | -0.18136200 | 0.25316200 |
|---|-------------|-------------|------------|

|   |             |             |              |
|---|-------------|-------------|--------------|
| H | -1.62971900 | 0.81424900  | 0.25330300   |
| C | 0.23836100  | -0.25460100 | -0.34006700  |
| C | 0.48552600  | -1.59074200 | -0.64972600  |
| C | -1.12239600 | -0.87886500 | 1.64403400   |
| H | -2.09107800 | -0.78690700 | 2.15789200   |
| H | -0.35768600 | -0.43504000 | 2.29592600   |
| C | -0.81982100 | -2.36069200 | 1.26858100   |
| H | 0.12548300  | -2.72996600 | 1.68830700   |
| H | -1.61529000 | -3.03799800 | 1.61124500   |
| C | -0.79151700 | -2.34435900 | -0.29866800  |
| H | -0.89184500 | -3.32930700 | -0.76901300  |
| C | -1.86459300 | -1.27354800 | -0.59115600  |
| H | -1.94410400 | -1.01208800 | -1.65537200  |
| H | -2.85770000 | -1.55371500 | -0.20871000  |
| N | 1.64697900  | -2.14479400 | -1.03062400  |
| P | 1.47647800  | 0.95666900  | -0.52757800  |
| C | 1.58455900  | 2.08616100  | 0.88438300   |
| C | 1.67939100  | 3.73001100  | 3.14442000   |
| C | 1.94051900  | 1.54741500  | 2.13401300   |
| C | 1.27182900  | 3.44911800  | 0.77184000   |
| C | 1.32062200  | 4.26559500  | 1.90531000   |
| C | 1.98775200  | 2.36905100  | 3.25861100   |
| H | 2.16832700  | 0.48264100  | 2.22818100   |
| H | 0.98213800  | 3.87226500  | -0.19118600  |
| H | 1.07190900  | 5.32529000  | 1.81760400   |
| H | 2.26320100  | 1.94879800  | 4.22815200   |
| H | 1.71675400  | 4.37268300  | 4.02654100   |
| C | 1.31974500  | 1.89631400  | -2.07514400  |
| C | 1.19712000  | 3.15036300  | -4.57061000  |
| C | 2.26946500  | 2.87540100  | -2.41675700  |
| C | 0.32041900  | 1.53690500  | -2.99137200  |
| C | 0.26003900  | 2.16907700  | -4.23594100  |
| C | 2.20129600  | 3.50310500  | -3.66055100  |
| H | 3.06032300  | 3.14910100  | -1.71313500  |
| H | -0.39775500 | 0.75879900  | -2.72612000  |
| H | -0.52253000 | 1.89306000  | -4.94594800  |
| H | 2.93490800  | 4.26801000  | - 3.92412300 |

|    |             |             |              |
|----|-------------|-------------|--------------|
| H  | 1.14887600  | 3.64182100  | -5.54469500  |
| C  | 1.74512400  | -3.40620400 | -1.69048500  |
| C  | 2.01022200  | -5.84499800 | -3.02409300  |
| C  | 1.52731200  | -3.46073400 | -3.09114700  |
| C  | 2.11362300  | -4.55884000 | -0.96144600  |
| C  | 2.23763000  | -5.77205000 | -1.65163700  |
| C  | 1.65990400  | -4.69685800 | -3.73471200  |
| H  | 2.51456800  | -6.67571200 | -1.10447200  |
| H  | 1.48689700  | -4.76561800 | -4.81018200  |
| H  | 2.10853200  | -6.80016100 | -3.54452300  |
| C  | 1.11937600  | -2.22377300 | -3.88102100  |
| H  | 1.37684700  | -1.34317100 | -3.27370500  |
| C  | 1.85189400  | -2.08908600 | -5.22244100  |
| H  | 2.94266100  | -2.17284800 | -5.10655000  |
| H  | 1.63039000  | -1.11121000 | -5.67838200  |
| H  | 1.53515800  | -2.86033800 | -5.94109200  |
| C  | -0.40240400 | -2.19209800 | -4.09616700  |
| H  | -0.94709000 | -2.25596900 | -3.14479500  |
| H  | -0.72415900 | -3.04157200 | -4.71901500  |
| H  | -0.70658500 | -1.26410400 | -4.60685200  |
| C  | 2.37895500  | -4.50701700 | 0.53436200   |
| H  | 2.18478500  | -3.47417500 | 0.85974500   |
| C  | 3.84678500  | -4.83219500 | 0.85140100   |
| H  | 4.53527500  | -4.18421900 | 0.28600900   |
| H  | 4.09096900  | -5.87313300 | 0.58811600   |
| H  | 4.05631300  | -4.70294000 | 1.92527800   |
| C  | 1.42418300  | -5.42076200 | 1.31646200   |
| H  | 0.37281900  | -5.18429900 | 1.09453700   |
| H  | 1.57911500  | -5.30841200 | 2.40126200   |
| H  | 1.58732700  | -6.48059300 | 1.06622700   |
| Pb | 3.43714400  | -0.78718600 | -0.85582600  |
| C  | 4.46299300  | -1.25494900 | 1.09475600   |
| H  | 4.72840300  | -0.29812600 | 1.56140100   |
| H  | 5.35439900  | -1.85809600 | 0.88722700   |
| H  | 3.74053800  | -1.81148600 | 1.70305600   |
| C  | 4.37240500  | -0.69972000 | -2.89192800  |
| H  | 5.40197700  | -0.33654700 | - 2.79091500 |

|   |            |             |             |
|---|------------|-------------|-------------|
| H | 3.75817800 | -0.02341000 | -3.49791700 |
| H | 4.34237700 | -1.72374400 | -3.28390700 |

---

Si/N-Rea

---

|   |             |             |             |
|---|-------------|-------------|-------------|
| C | -1.17813200 | 0.33279400  | -0.50920000 |
| H | -1.52042500 | 1.36277100  | -0.66941800 |
| C | 0.23988100  | 0.00909300  | -0.95174600 |
| C | 0.35394600  | -1.33640400 | -1.07401500 |
| C | -1.39939800 | -0.21107100 | 0.93900000  |
| H | -2.42479400 | 0.02064400  | 1.26260600  |
| H | -0.71644000 | 0.23543900  | 1.66986200  |
| C | -1.19840300 | -1.74404300 | 0.76831500  |
| H | -0.33338700 | -2.12648000 | 1.32738600  |
| H | -2.07911300 | -2.31276300 | 1.09905200  |
| C | -1.00561200 | -1.92403100 | -0.78016800 |
| H | -1.18464800 | -2.93941500 | -1.14812000 |
| C | -1.90378300 | -0.78007000 | -1.31460400 |
| H | -1.83176000 | -0.65088800 | -2.40363800 |
| H | -2.95717700 | -0.89750900 | -1.02224000 |
| N | 1.59695400  | -1.92777700 | -1.19600400 |
| N | 1.51417700  | 0.74257800  | -0.77334900 |
| C | 1.62905400  | 1.09954900  | 0.67671100  |
| C | 1.62570000  | 1.68090400  | 3.40801300  |
| C | 1.92303500  | 0.09556200  | 1.60178300  |
| C | 1.30075200  | 2.38529100  | 1.10881200  |
| C | 1.30316700  | 2.67046700  | 2.47741600  |
| C | 1.92996700  | 0.39069300  | 2.96512800  |
| H | 2.10250900  | -0.92604100 | 1.27613100  |
| H | 1.03544000  | 3.16242400  | 0.39368900  |
| H | 1.04547400  | 3.67701000  | 2.81281800  |
| H | 2.16298300  | -0.39846800 | 3.68266200  |
| H | 1.62972600  | 1.91068800  | 4.47514700  |
| C | 1.70544700  | 1.91821200  | -1.66189700 |
| C | 2.18398500  | 4.04070900  | -3.40058100 |



|   |             |             |             |
|---|-------------|-------------|-------------|
| C | 2.87950200  | 2.66714800  | -1.53069500 |
| C | 0.77286300  | 2.21553300  | -2.65064900 |
| C | 1.01729500  | 3.28439400  | -3.52045700 |
| C | 3.11505900  | 3.72931400  | -2.40320100 |
| H | 3.59870300  | 2.43364600  | -0.74366300 |
| H | -0.12592500 | 1.60864700  | -2.75171500 |
| H | 0.28652300  | 3.52167000  | -4.29615300 |
| H | 4.02932500  | 4.31735700  | -2.30140800 |
| H | 2.37000200  | 4.87335700  | -4.08161400 |
| C | 1.76211800  | -3.31703600 | -1.55436100 |
| C | 2.08337300  | -6.01349700 | -2.20836600 |
| C | 1.33106900  | -3.77866400 | -2.82205700 |
| C | 2.35077200  | -4.19512000 | -0.61529300 |
| C | 2.50781400  | -5.54121700 | -0.96909400 |
| C | 1.49732200  | -5.13804900 | -3.11926600 |
| H | 2.95815700  | -6.23392100 | -0.25558300 |
| H | 1.16699700  | -5.51698300 | -4.08832600 |
| H | 2.20750600  | -7.06776800 | -2.46484100 |
| C | 0.70582600  | -2.87242700 | -3.87610300 |
| H | 0.68907800  | -1.84703100 | -3.48276200 |
| C | 1.53551600  | -2.86130300 | -5.17087500 |
| H | 2.59344300  | -2.63123900 | -4.97923400 |
| H | 1.14274800  | -2.11185300 | -5.87598200 |
| H | 1.49923000  | -3.83885200 | -5.67552900 |
| C | -0.74930500 | -3.26417000 | -4.18201500 |
| H | -1.37492800 | -3.25998600 | -3.27870000 |
| H | -0.80620500 | -4.27250600 | -4.62020900 |
| H | -1.19228800 | -2.56273900 | -4.90640900 |
| C | 2.76460100  | -3.74063100 | 0.77532300  |
| H | 2.65486400  | -2.64955700 | 0.80172400  |
| C | 4.23019400  | -4.06707000 | 1.09206500  |
| H | 4.91049400  | -3.67151900 | 0.32263500  |
| H | 4.39889000  | -5.15308600 | 1.15356600  |
| H | 4.52170300  | -3.63597200 | 2.06286300  |
| C | 1.82090500  | -4.31582200 | 1.84333700  |
| H | 0.77143900  | -4.06539200 | 1.62722500  |
| H | 2.07241700  | -3.92239600 | 2.84136500  |

|    |            |             |             |
|----|------------|-------------|-------------|
| H  | 1.89608400 | -5.41346100 | 1.88796700  |
| Si | 2.78090300 | -0.63642200 | -1.44625000 |
| C  | 4.36314600 | -0.68938800 | -0.48320100 |
| H  | 4.94454500 | 0.22487300  | -0.67799600 |
| H  | 4.94885400 | -1.53774600 | -0.87502900 |
| H  | 4.25142500 | -0.81850000 | 0.59836400  |
| C  | 3.09100000 | -0.27606100 | -3.23713800 |
| H  | 3.74065400 | 0.60103400  | -3.36530800 |
| H  | 2.16348400 | -0.11585300 | -3.80096800 |
| H  | 3.60628000 | -1.15200300 | -3.66373100 |

---

Si/As-Rea

---

|    |             |             |             |
|----|-------------|-------------|-------------|
| C  | -1.28612600 | -0.36305400 | 0.34613700  |
| H  | -1.82085300 | 0.59465100  | 0.34295400  |
| C  | 0.10243600  | -0.35750000 | -0.27524600 |
| C  | 0.43455400  | -1.65861500 | -0.55174400 |
| C  | -1.15028700 | -1.03311400 | 1.74936600  |
| H  | -2.10806100 | -0.99399300 | 2.28893800  |
| H  | -0.40030000 | -0.52447100 | 2.37075500  |
| C  | -0.75890700 | -2.49944400 | 1.39582000  |
| H  | 0.21666800  | -2.79980300 | 1.80249900  |
| H  | -1.50290000 | -3.21879600 | 1.76677000  |
| C  | -0.76079900 | -2.50984800 | -0.17328000 |
| H  | -0.79748600 | -3.50547000 | -0.63005500 |
| C  | -1.91735500 | -1.52500700 | -0.46027800 |
| H  | -2.03531400 | -1.29376200 | -1.52788900 |
| H  | -2.87909900 | -1.86616700 | -0.04936900 |
| N  | 1.68515500  | -2.10306400 | -0.92722300 |
| As | 1.50749900  | 0.86798600  | -0.53344800 |
| C  | 1.68571000  | 2.15273200  | 0.88558700  |
| C  | 1.91583000  | 3.98331700  | 2.97441300  |
| C  | 1.88476900  | 1.69131800  | 2.19550500  |
| C  | 1.59739100  | 3.52408000  | 0.61623700  |

|   |             |             |              |
|---|-------------|-------------|--------------|
| C | 1.71422200  | 4.43698600  | 1.66847400   |
| C | 1.99907800  | 2.61160700  | 3.23791300   |
| H | 1.94154400  | 0.62188900  | 2.40719700   |
| H | 1.43136500  | 3.88280400  | -0.40116000  |
| H | 1.64295100  | 5.50735100  | 1.46434100   |
| H | 2.15113600  | 2.25730500  | 4.25956200   |
| H | 2.00546600  | 4.70080800  | 3.79275600   |
| C | 1.28311900  | 1.77479500  | -2.21962300  |
| C | 1.03078000  | 2.91073400  | -4.75147700  |
| C | 2.32155000  | 2.56654300  | -2.73165000  |
| C | 0.12583700  | 1.53981000  | -2.97142800  |
| C | 0.00212100  | 2.11460700  | -4.23881300  |
| C | 2.18873400  | 3.13695000  | -3.99940500  |
| H | 3.23184700  | 2.73909300  | -2.15127800  |
| H | -0.66490600 | 0.90072100  | -2.57334900  |
| H | -0.90027800 | 1.93832800  | -4.82804200  |
| H | 2.99265900  | 3.75575600  | -4.40345900  |
| H | 0.93194400  | 3.35593000  | -5.74378700  |
| C | 1.83811600  | -3.30911200 | -1.70690900  |
| C | 2.17369600  | -5.61134300 | -3.23787100  |
| C | 1.59732600  | -3.25166800 | -3.10038000  |
| C | 2.24632100  | -4.50170900 | -1.07343600  |
| C | 2.40900300  | -5.64713500 | -1.86562400  |
| C | 1.76986200  | -4.42341900 | -3.84688300  |
| H | 2.72115400  | -6.58328700 | -1.39824100  |
| H | 1.58593800  | -4.40794400 | -4.92274900  |
| H | 2.30443100  | -6.51458800 | -3.83783900  |
| C | 1.12514000  | -1.97702700 | -3.78649200  |
| H | 1.26809100  | -1.14397600 | -3.08531200  |
| C | 1.92368400  | -1.64256100 | -5.05360100  |
| H | 3.00780300  | -1.64593100 | -4.86552800  |
| H | 1.64146800  | -0.64480700 | -5.42489800  |
| H | 1.72651700  | -2.36178100 | -5.86326700  |
| C | -0.37871200 | -2.05183000 | -4.09402500  |
| H | -0.96528400 | -2.25847100 | -3.18762700  |
| H | -0.59109800 | -2.85575400 | -4.81610900  |
| H | -0.73485300 | -1.10435600 | - 4.52852600 |

|    |            |             |             |
|----|------------|-------------|-------------|
| C  | 2.49519100 | -4.57932200 | 0.42456000  |
| H  | 2.30375000 | -3.57998000 | 0.83956600  |
| C  | 3.95427200 | -4.94518000 | 0.73606900  |
| H  | 4.65921000 | -4.26371200 | 0.23370300  |
| H  | 4.19323600 | -5.96539900 | 0.39776300  |
| H  | 4.14526100 | -4.90175600 | 1.81988000  |
| C  | 1.51981900 | -5.54972000 | 1.10827800  |
| H  | 0.47360100 | -5.27950500 | 0.90050700  |
| H  | 1.66513600 | -5.54043400 | 2.20002400  |
| H  | 1.67213400 | -6.58346300 | 0.76107700  |
| Si | 3.04011400 | -0.97466900 | -0.67341000 |
| C  | 3.86213200 | -1.18519000 | 0.98768900  |
| H  | 4.46342400 | -0.29829400 | 1.24268600  |
| H  | 4.53152200 | -2.05918200 | 0.96317900  |
| H  | 3.11977300 | -1.35010800 | 1.78212300  |
| C  | 4.19710400 | -0.87425700 | -2.12214400 |
| H  | 5.07221600 | -0.25407900 | -1.87430300 |
| H  | 3.70178600 | -0.45486500 | -3.00853600 |
| H  | 4.55256600 | -1.88661900 | -2.37497300 |

---

Si/Sb-Rea

---

|   |             |             |             |
|---|-------------|-------------|-------------|
| C | -1.25616700 | -0.45359300 | 0.30636900  |
| H | -1.81060200 | 0.49257300  | 0.27921000  |
| C | 0.13148800  | -0.43439400 | -0.31739700 |
| C | 0.48841200  | -1.73416300 | -0.55111700 |
| C | -1.09628300 | -1.07598900 | 1.72967000  |
| H | -2.04767300 | -1.03070700 | 2.28010100  |
| H | -0.34457800 | -0.53690300 | 2.32388600  |
| C | -0.68997200 | -2.54799600 | 1.41928000  |
| H | 0.28852300  | -2.82754700 | 1.83459500  |
| H | -1.42733800 | -3.26298800 | 1.81160100  |
| C | -0.69188600 | -2.60043400 | -0.14761800 |
| H | -0.70808200 | -3.60826300 | -0.57835900 |

|    |             |             |              |
|----|-------------|-------------|--------------|
| C  | -1.86870700 | -1.65065000 | -0.46037400  |
| H  | -1.99473900 | -1.45424600 | -1.53403200  |
| H  | -2.82259000 | -1.99692000 | -0.03535000  |
| N  | 1.74662200  | -2.19847000 | -0.90710700  |
| Sb | 1.66188400  | 0.95715900  | -0.62053600  |
| C  | 1.75026300  | 2.39495700  | 0.94221700   |
| C  | 1.81961700  | 4.27300000  | 2.99975800   |
| C  | 2.06761600  | 1.98482900  | 2.24498700   |
| C  | 1.46801300  | 3.73786800  | 0.66209400   |
| C  | 1.50441700  | 4.67518500  | 1.69917600   |
| C  | 2.09919000  | 2.92982500  | 3.27269900   |
| H  | 2.28402100  | 0.93833800  | 2.46955800   |
| H  | 1.21396700  | 4.05916800  | -0.35043000  |
| H  | 1.28243800  | 5.72338900  | 1.48723700   |
| H  | 2.34229200  | 2.61551700  | 4.29006200   |
| H  | 1.84641300  | 5.00896200  | 3.80611700   |
| C  | 1.21630300  | 1.98403600  | -2.43114300  |
| C  | 0.63858300  | 3.20370200  | -4.86857700  |
| C  | 2.05417500  | 2.99939100  | -2.91277800  |
| C  | 0.09616800  | 1.57081900  | -3.16324700  |
| C  | -0.19022900 | 2.18683000  | -4.38471500  |
| C  | 1.75744600  | 3.61029200  | -4.13417700  |
| H  | 2.93407100  | 3.32050800  | -2.34908900  |
| H  | -0.54627500 | 0.77148000  | -2.78640400  |
| H  | -1.06474200 | 1.87200500  | -4.95855200  |
| H  | 2.40415100  | 4.40403100  | -4.51455700  |
| H  | 0.41217800  | 3.68252100  | -5.82365800  |
| C  | 1.87597200  | -3.39258300 | -1.71080100  |
| C  | 2.16762300  | -5.67777100 | -3.27595300  |
| C  | 1.66540000  | -3.30310400 | -3.10662100  |
| C  | 2.23478000  | -4.60874900 | -1.09150800  |
| C  | 2.37639000  | -5.74494500 | -1.90040300  |
| C  | 1.81404100  | -4.46694700 | -3.87072900  |
| H  | 2.65122500  | -6.69830500 | -1.44446400  |
| H  | 1.65253800  | -4.42691200 | -4.94955600  |
| H  | 2.28100400  | -6.57404200 | -3.88973600  |
| C  | 1.25425300  | -2.00127700 | - 3.78123500 |

|    |             |             |             |
|----|-------------|-------------|-------------|
| H  | 1.40526700  | -1.18591100 | -3.05935800 |
| C  | 2.09871800  | -1.67149300 | -5.01950300 |
| H  | 3.17700200  | -1.70447600 | -4.80046000 |
| H  | 1.85237500  | -0.66333200 | -5.38779400 |
| H  | 1.90930800  | -2.37692600 | -5.84291500 |
| C  | -0.24165200 | -2.02427200 | -4.13222300 |
| H  | -0.86020800 | -2.20173400 | -3.24099100 |
| H  | -0.46055000 | -2.82669300 | -4.85392800 |
| H  | -0.55087000 | -1.06965700 | -4.58574800 |
| C  | 2.46583300  | -4.71544900 | 0.40782900  |
| H  | 2.25395100  | -3.72867900 | 0.84189500  |
| C  | 3.92939800  | -5.06113600 | 0.72298000  |
| H  | 4.62494700  | -4.34903300 | 0.25004400  |
| H  | 4.19285800  | -6.06411400 | 0.35274800  |
| H  | 4.10995700  | -5.04927800 | 1.80950600  |
| C  | 1.50145700  | -5.71366200 | 1.06521000  |
| H  | 0.45284400  | -5.45321600 | 0.85647800  |
| H  | 1.63998300  | -5.72240300 | 2.15776700  |
| H  | 1.67008700  | -6.73895100 | 0.70105200  |
| Si | 3.15692800  | -1.17735300 | -0.58562900 |
| C  | 3.76014200  | -1.30539500 | 1.17841500  |
| H  | 4.40956000  | -0.45546400 | 1.44031700  |
| H  | 4.34019800  | -2.23332500 | 1.30221700  |
| H  | 2.91322400  | -1.33774500 | 1.88004200  |
| C  | 4.46041700  | -1.31930500 | -1.89824400 |
| H  | 5.32922900  | -0.68969600 | -1.65317600 |
| H  | 4.07385100  | -1.03067400 | -2.88517700 |
| H  | 4.79668500  | -2.36755800 | -1.95810400 |

---

Si/Bi-Rea

---

|   |             |             |             |
|---|-------------|-------------|-------------|
| C | -1.01257000 | -0.33513400 | 0.29696300  |
| H | -1.50661100 | 0.64245900  | 0.23597400  |
| C | 0.36163100  | -0.43183300 | -0.34580200 |
| C | 0.62226900  | -1.75291700 | -0.52443100 |

|    |             |             |              |
|----|-------------|-------------|--------------|
| C  | -0.85789600 | -0.89597200 | 1.74776800   |
| H  | -1.78992000 | -0.75629800 | 2.31510300   |
| H  | -0.05785500 | -0.37798700 | 2.29608700   |
| C  | -0.56070000 | -2.40651200 | 1.50723600   |
| H  | 0.40409300  | -2.73295300 | 1.92221300   |
| H  | -1.33813200 | -3.04655400 | 1.94883400   |
| C  | -0.59382400 | -2.53337000 | -0.05357400  |
| H  | -0.68020400 | -3.55760100 | -0.43565500  |
| C  | -1.71556000 | -1.52908600 | -0.39631300  |
| H  | -1.84686900 | -1.38248200 | -1.47774700  |
| H  | -2.68249400 | -1.78895600 | 0.06006900   |
| N  | 1.85880200  | -2.30839500 | -0.87776700  |
| Bi | 2.02877700  | 0.97652700  | -0.75404300  |
| C  | 1.82870800  | 2.49850800  | 0.87603500   |
| C  | 1.49733700  | 4.39072400  | 2.88635200   |
| C  | 2.29105700  | 2.21691800  | 2.16558500   |
| C  | 1.20948000  | 3.71440900  | 0.57509000   |
| C  | 1.04505700  | 4.66171900  | 1.59219600   |
| C  | 2.11855700  | 3.17123200  | 3.17309300   |
| H  | 2.77872000  | 1.26866000  | 2.40121400   |
| H  | 0.85180600  | 3.93157100  | -0.43427900  |
| H  | 0.56016500  | 5.61460000  | 1.36802100   |
| H  | 2.47281800  | 2.95967600  | 4.18456900   |
| H  | 1.36673500  | 5.13377500  | 3.67589100   |
| C  | 1.22667800  | 2.03323000  | -2.56209400  |
| C  | 0.18560800  | 3.28704300  | -4.81338200  |
| C  | 1.93612700  | 3.08618800  | -3.14793700  |
| C  | 0.00741000  | 1.59638400  | -3.08536600  |
| C  | -0.51251400 | 2.23193700  | -4.21825300  |
| C  | 1.40541400  | 3.71467900  | -4.27962900  |
| H  | 2.89013900  | 3.42785600  | -2.73803200  |
| H  | -0.53365000 | 0.76871600  | -2.62067300  |
| H  | -1.46688900 | 1.90084100  | -4.63431300  |
| H  | 1.94906200  | 4.53993400  | -4.74514300  |
| H  | -0.22334200 | 3.78007500  | -5.69789900  |
| C  | 1.91219300  | -3.46343900 | -1.74436200  |
| C  | 2.08346600  | -5.68671700 | - 3.40711800 |

|    |             |             |             |
|----|-------------|-------------|-------------|
| C  | 1.72971900  | -3.29471300 | -3.13513600 |
| C  | 2.17268100  | -4.72835900 | -1.17348600 |
| C  | 2.25792700  | -5.83233900 | -2.03208800 |
| C  | 1.81766800  | -4.43025600 | -3.95023100 |
| H  | 2.45898400  | -6.82224800 | -1.61780200 |
| H  | 1.67866600  | -4.33063600 | -5.02845500 |
| H  | 2.15241800  | -6.55905800 | -4.06068300 |
| C  | 1.41906500  | -1.93913400 | -3.75431200 |
| H  | 1.55780500  | -1.17414600 | -2.97751300 |
| C  | 2.35878900  | -1.58134200 | -4.91368800 |
| H  | 3.41752500  | -1.65060200 | -4.61841400 |
| H  | 2.16486800  | -0.55262600 | -5.25512500 |
| H  | 2.21499300  | -2.24815300 | -5.77747900 |
| C  | -0.05096400 | -1.87177200 | -4.19615000 |
| H  | -0.72957600 | -2.05623100 | -3.35035600 |
| H  | -0.26363100 | -2.62942400 | -4.96641900 |
| H  | -0.28366200 | -0.88327400 | -4.62016300 |
| C  | 2.36082400  | -4.91196200 | 0.32560500  |
| H  | 2.11240000  | -3.95535200 | 0.80587700  |
| C  | 3.82366200  | -5.23816000 | 0.66604800  |
| H  | 4.51342200  | -4.46890300 | 0.28175800  |
| H  | 4.13223800  | -6.19747700 | 0.22215000  |
| H  | 3.96717100  | -5.31145500 | 1.75573800  |
| C  | 1.40443800  | -5.96398000 | 0.90451700  |
| H  | 0.35672300  | -5.72164000 | 0.67011900  |
| H  | 1.50648600  | -6.01464900 | 1.99977900  |
| H  | 1.61332700  | -6.96909000 | 0.50682800  |
| Si | 3.31104900  | -1.45500200 | -0.45062900 |
| C  | 3.65216400  | -1.39526700 | 1.38083400  |
| H  | 4.37720900  | -0.60747700 | 1.63552300  |
| H  | 4.07737800  | -2.36680900 | 1.68323100  |
| H  | 2.72309800  | -1.23501800 | 1.94664100  |
| C  | 4.73379300  | -1.76821600 | -1.59290700 |
| H  | 5.59049900  | -1.12535200 | -1.34170800 |
| H  | 4.44365800  | -1.59870800 | -2.63912200 |
| H  | 5.04665800  | -2.82106900 | -1.49562200 |



---

benzaldehyde

---

|   |             |             |             |
|---|-------------|-------------|-------------|
| C | 0.21630400  | 0.30475400  | 1.07492800  |
| O | -0.12034400 | 0.01038400  | -0.04829200 |
| C | 1.40738800  | -0.24005700 | 1.77020000  |
| C | 3.64574900  | -1.26973700 | 3.08517400  |
| C | 2.23827700  | -1.16778100 | 1.12017800  |
| C | 1.70422500  | 0.16854100  | 3.07814000  |
| C | 2.82268500  | -0.34579700 | 3.73631600  |
| C | 3.35391000  | -1.68007100 | 1.77707400  |
| H | 1.98298400  | -1.46751800 | 0.10160600  |
| H | 1.05263500  | 0.89209300  | 3.57685600  |
| H | 3.05446800  | -0.02864200 | 4.75559000  |
| H | 4.00243200  | -2.40189200 | 1.27500800  |
| H | 4.52126200  | -1.67424000 | 3.59907500  |
| H | -0.37875900 | 1.03665900  | 1.68289600  |

---

C/P-PC

---

|   |             |             |             |
|---|-------------|-------------|-------------|
| C | -0.78625400 | -1.79417800 | -0.12512700 |
| C | -1.12641800 | -2.55400200 | -1.35374500 |
| C | 0.46162800  | -2.16918700 | 0.59126700  |
| H | -0.86558100 | -3.61476400 | -1.24769200 |
| H | -2.16665000 | -2.43727700 | -1.67147600 |
| H | -0.46996000 | -2.13471300 | -2.14633500 |
| P | 1.22542000  | 0.98133900  | -0.10494400 |
| N | -1.55851900 | -0.81301100 | 0.28877200  |
| H | 0.49742600  | -3.26576400 | 0.67132300  |
| H | 0.52990500  | -1.71001000 | 1.58219100  |
| H | 1.33797500  | -1.87085400 | -0.00254600 |
| C | 0.90000200  | 2.61520300  | -0.88776100 |

|   |             |             |             |
|---|-------------|-------------|-------------|
| C | 2.76266200  | 1.26411700  | 0.87133200  |
| C | -0.03708700 | 0.92799900  | 1.23400100  |
| C | -2.94666400 | -0.70707200 | -0.16884000 |
| C | -1.15925600 | 0.16711500  | 1.25033900  |
| C | 0.93994400  | 2.65632600  | -2.29156800 |
| C | 0.63480800  | 3.79954100  | -0.17906600 |
| C | 3.21275600  | 0.23070200  | 1.71441200  |
| C | 3.56709600  | 2.40272300  | 0.71311500  |
| C | -0.06366200 | 1.69921200  | 2.55534500  |
| C | -3.89702300 | -1.54287700 | 0.45620000  |
| C | -3.27002600 | 0.21810700  | -1.17412800 |
| C | -1.94951700 | 0.46698800  | 2.51296500  |
| C | 0.73815200  | 3.86034900  | -2.97274500 |
| H | 1.10010700  | 1.73747300  | -2.85853800 |
| C | 0.42319600  | 4.99852400  | -0.86088400 |
| H | 0.60271200  | 3.79374400  | 0.91029300  |
| C | 4.41749400  | 0.34766800  | 2.40737600  |
| H | 2.62412400  | -0.68183000 | 1.82477000  |
| C | 4.78182500  | 2.51212600  | 1.39852100  |
| H | 3.24949800  | 3.21032700  | 0.05248400  |
| C | 0.16696200  | 0.65639500  | 3.69828200  |
| C | -1.58083100 | 1.95478800  | 2.70279300  |
| H | 0.61152500  | 2.55982200  | 2.60521200  |
| C | -3.54129300 | -2.54833900 | 1.54592800  |
| C | -5.22209000 | -1.43432700 | 0.01688900  |
| C | -2.24084900 | 1.12703900  | -1.82303400 |
| C | -4.61269800 | 0.28127000  | -1.57305900 |
| C | -1.13840300 | -0.18896300 | 3.67680900  |
| H | -3.01290900 | 0.21022900  | 2.48053200  |
| C | 0.48010900  | 5.03258300  | -2.25869200 |
| H | 0.77367700  | 3.87817700  | -4.06423700 |
| H | 0.21670600  | 5.91250900  | -0.29954100 |
| C | 5.20787700  | 1.49129300  | 2.25042300  |
| H | 4.74511300  | -0.45967500 | 3.06648500  |
| H | 5.39611800  | 3.40547900  | 1.26530600  |
| H | 1.07648000  | 0.06527600  | 3.53326600  |
| H | 0.28975300  | 1.18178000  | 4.65621000  |

|   |             |             |              |
|---|-------------|-------------|--------------|
| H | -1.98737300 | 2.59935900  | 1.91068400   |
| H | -1.86558400 | 2.35134400  | 3.68872800   |
| C | -4.43579800 | -2.40302000 | 2.78627400   |
| C | -3.59056700 | -3.98845500 | 1.00692000   |
| H | -2.50963300 | -2.35408000 | 1.87405700   |
| C | -5.57727400 | -0.53549800 | -0.98852100  |
| H | -5.98922900 | -2.06476800 | 0.46931600   |
| C | -2.14086100 | 0.88880200  | -3.33634400  |
| C | -2.54355700 | 2.59607300  | -1.49409000  |
| H | -1.25592100 | 0.88920000  | -1.40034700  |
| H | -4.90274000 | 0.98202700  | -2.35768000  |
| H | -0.96237700 | -1.26141800 | 3.50679600   |
| H | -1.69788100 | -0.09882100 | 4.61893500   |
| H | 0.31847700  | 5.97337800  | -2.78947100  |
| H | 6.15434400  | 1.58257100  | 2.78755500   |
| H | -4.08686700 | -3.07377400 | 3.58621700   |
| H | -5.48038300 | -2.67072900 | 2.56699400   |
| H | -4.42928500 | -1.37446100 | 3.17666400   |
| H | -4.60890500 | -4.24900600 | 0.67917700   |
| H | -3.29596700 | -4.70494700 | 1.78932700   |
| H | -2.92215600 | -4.12919600 | 0.14499800   |
| H | -6.61680900 | -0.47116700 | -1.31686500  |
| H | -3.09030400 | 1.11410100  | -3.84623700  |
| H | -1.36655400 | 1.53932400  | -3.76802000  |
| H | -1.86436300 | -0.15108100 | -3.56402800  |
| H | -2.55345700 | 2.76511800  | -0.40697000  |
| H | -3.52514700 | 2.89807500  | -1.89117600  |
| H | -1.78352500 | 3.25480800  | -1.93388700  |
| C | 2.09826900  | -0.84651000 | -2.79091000  |
| O | 0.99856900  | -0.96299300 | -3.29646400  |
| C | 2.80463800  | -1.91208100 | -2.05056100  |
| C | 4.06341400  | -3.87631400 | -0.51597700  |
| C | 2.39320500  | -3.25293500 | -2.15200700  |
| C | 3.86353600  | -1.56545500 | -1.19683200  |
| C | 4.48119700  | -2.54499800 | -0.41798600  |
| C | 3.02735300  | -4.23234400 | -1.39153000  |
| H | 1.58656800  | -3.50757300 | - 2.84221700 |

|   |            |             |             |
|---|------------|-------------|-------------|
| H | 4.18211100 | -0.52306000 | -1.12318000 |
| H | 5.29055500 | -2.27012900 | 0.26123500  |
| H | 2.72503200 | -5.27826200 | -1.48046800 |
| H | 4.55607000 | -4.64597100 | 0.08277900  |
| H | 2.65022000 | 0.12194000  | -2.84691600 |

---

Si/P-PC

---

|    |             |             |             |
|----|-------------|-------------|-------------|
| Si | -0.63666800 | -0.93087400 | -0.57912500 |
| C  | -1.02903500 | -0.98009900 | -2.39021400 |
| C  | -0.06352700 | -2.54632400 | 0.15241600  |
| H  | -0.22538200 | -1.50272000 | -2.92641300 |
| H  | -1.97737700 | -1.52276700 | -2.53455700 |
| H  | -1.14395500 | 0.02762700  | -2.80997800 |
| P  | 0.71926500  | 0.80224800  | 0.12738500  |
| N  | -1.99637500 | -0.24208900 | 0.37600200  |
| H  | -0.78596900 | -3.33617000 | -0.10446000 |
| H  | 0.01334600  | -2.49954200 | 1.24802200  |
| H  | 0.91160200  | -2.80734300 | -0.27952500 |
| C  | 0.74338300  | 2.14293100  | -1.09955600 |
| C  | 2.40735800  | 0.45984300  | 0.68657000  |
| C  | -0.36426800 | 1.19069800  | 1.46034600  |
| C  | -3.37757500 | -0.37802000 | -0.01346200 |
| C  | -1.61916300 | 0.63578400  | 1.35775200  |
| C  | 1.13629300  | 1.87329400  | -2.42153400 |
| C  | 0.28169000  | 3.41882800  | -0.74469900 |
| C  | 2.63543300  | -0.59902400 | 1.57894400  |
| C  | 3.47804100  | 1.25557200  | 0.25329900  |
| C  | -0.29809300 | 1.90043700  | 2.80589100  |
| C  | -4.12957200 | -1.47867700 | 0.44685000  |
| C  | -3.93603600 | 0.59417400  | -0.87754500 |
| C  | -2.38559100 | 1.02884400  | 2.60214100  |
| C  | 1.07614000  | 2.88799400  | -3.37833500 |
| H  | 1.46259000  | 0.86789300  | -2.69540000 |

|   |             |             |              |
|---|-------------|-------------|--------------|
| C | 0.22910800  | 4.42825000  | -1.70782800  |
| H | -0.05255300 | 3.61367900  | 0.27596100   |
| C | 3.93007700  | -0.86505100 | 2.02463300   |
| H | 1.80517900  | -1.21725200 | 1.92298900   |
| C | 4.76989200  | 0.98655500  | 0.71192500   |
| H | 3.30407400  | 2.08246200  | -0.43737000  |
| C | -0.31578300 | 0.79167600  | 3.90343300   |
| C | -1.75772800 | 2.41067400  | 2.89875300   |
| H | 0.49920900  | 2.64545400  | 2.91944000   |
| C | -3.54406600 | -2.51841600 | 1.38886600   |
| C | -5.46188400 | -1.59172700 | 0.02470200   |
| C | -3.14089900 | 1.80448000  | -1.34832200  |
| C | -5.27152700 | 0.43908300  | -1.26780500  |
| C | -1.73466600 | 0.16751900  | 3.74083100   |
| H | -3.47670600 | 0.95379900  | 2.53135400   |
| C | 0.62483500  | 4.16365700  | -3.02280700  |
| H | 1.37349600  | 2.68018400  | -4.40847000  |
| H | -0.12821900 | 5.42276100  | -1.43236400  |
| C | 4.99809000  | -0.07288600 | 1.59292400   |
| H | 4.10700900  | -1.69632300 | 2.70957300   |
| H | 5.60215100  | 1.60867200  | 0.37600300   |
| H | 0.49388300  | 0.06379700  | 3.75707200   |
| H | -0.18688800 | 1.23498300  | 4.90202100   |
| H | -1.99825400 | 3.16717900  | 2.13908100   |
| H | -2.02281200 | 2.79301700  | 3.89577800   |
| C | -4.27286200 | -2.52591700 | 2.74139200   |
| C | -3.53533500 | -3.91653500 | 0.75308700   |
| H | -2.50117900 | -2.23132800 | 1.58199500   |
| C | -6.02946700 | -0.64441200 | -0.82397900  |
| H | -6.06502500 | -2.43391100 | 0.37024400   |
| C | -3.24894400 | 2.04856200  | -2.85949500  |
| C | -3.54918400 | 3.06114700  | -0.56352600  |
| H | -2.08193900 | 1.61972600  | -1.12635300  |
| H | -5.72763500 | 1.17743100  | -1.92999400  |
| H | -1.71317500 | -0.89948200 | 3.47951700   |
| H | -2.33021900 | 0.26724900  | 4.65958200   |
| H | 0.57491900  | 4.95326600  | - 3.77574600 |

|   |             |             |             |
|---|-------------|-------------|-------------|
| H | 6.01058300  | -0.28694500 | 1.94004800  |
| H | -3.79342700 | -3.23281700 | 3.43697900  |
| H | -5.32499100 | -2.83101900 | 2.62918600  |
| H | -4.26360400 | -1.52895400 | 3.20717500  |
| H | -4.55834500 | -4.28917000 | 0.58804900  |
| H | -3.02013100 | -4.63919300 | 1.40545800  |
| H | -3.02890900 | -3.91261100 | -0.22511800 |
| H | -7.06941600 | -0.74891500 | -1.14116900 |
| H | -4.25860100 | 2.37761800  | -3.14991400 |
| H | -2.54479600 | 2.83842000  | -3.16473100 |
| H | -3.01802300 | 1.14055700  | -3.43628300 |
| H | -3.45835000 | 2.90525600  | 0.52077000  |
| H | -4.59662000 | 3.33052700  | -0.77202100 |
| H | -2.91497800 | 3.91703400  | -0.84393100 |
| C | 3.35066000  | -1.07392400 | -2.01744600 |
| O | 2.14521000  | -1.23989400 | -1.92297900 |
| C | 4.38048500  | -1.89914700 | -1.37743600 |
| C | 6.37735400  | -3.38346000 | -0.10995400 |
| C | 4.03807000  | -3.01943100 | -0.59963700 |
| C | 5.72936700  | -1.53424800 | -1.52029400 |
| C | 6.72652000  | -2.27265200 | -0.88553000 |
| C | 5.03422300  | -3.75896000 | 0.02994800  |
| H | 2.98824300  | -3.29632300 | -0.49945000 |
| H | 5.98965200  | -0.66165400 | -2.12533200 |
| H | 7.77514300  | -1.98905100 | -0.99548700 |
| H | 4.77242500  | -4.63257700 | 0.63062500  |
| H | 7.15769200  | -3.96636000 | 0.38494000  |
| H | 3.74944200  | -0.22019900 | -2.61751900 |

---

#### Ge/P-PC

---

|    |             |             |             |
|----|-------------|-------------|-------------|
| Ge | -0.57089900 | -0.95787500 | -0.65827200 |
| C  | -1.03341800 | -0.93943700 | -2.53935400 |
| C  | -0.05253000 | -2.66013100 | 0.13086800  |

|   |             |             |             |
|---|-------------|-------------|-------------|
| H | -0.30587000 | -1.54870300 | -3.08986700 |
| H | -2.04467900 | -1.35693200 | -2.65356300 |
| H | -1.02383100 | 0.08618300  | -2.92743600 |
| P | 0.74739000  | 0.83162100  | 0.14595000  |
| N | -2.01430100 | -0.24479300 | 0.38911100  |
| H | -0.81554300 | -3.41160400 | -0.11502400 |
| H | 0.01926900  | -2.57398800 | 1.22321200  |
| H | 0.91120800  | -2.96401700 | -0.29335700 |
| C | 0.77729400  | 2.17671500  | -1.07723600 |
| C | 2.43308400  | 0.48107500  | 0.70461200  |
| C | -0.35741900 | 1.17973400  | 1.46032200  |
| C | -3.38906800 | -0.39512500 | 0.00276700  |
| C | -1.62205000 | 0.63130500  | 1.34882300  |
| C | 1.19224200  | 1.91965600  | -2.39510100 |
| C | 0.29125900  | 3.44406500  | -0.72431200 |
| C | 2.64859700  | -0.58145400 | 1.59621300  |
| C | 3.51356200  | 1.26151200  | 0.26791600  |
| C | -0.30308900 | 1.91347500  | 2.79494400  |
| C | -4.13447900 | -1.49737800 | 0.47209800  |
| C | -3.95374700 | 0.55848500  | -0.87953300 |
| C | -2.39321800 | 1.05556200  | 2.58362000  |
| C | 1.13232000  | 2.93774200  | -3.34824900 |
| H | 1.53163500  | 0.91943600  | -2.67147600 |
| C | 0.23936400  | 4.45757900  | -1.68332400 |
| H | -0.06194500 | 3.62847100  | 0.29182600  |
| C | 3.94024300  | -0.86604700 | 2.03814000  |
| H | 1.80897400  | -1.18687000 | 1.94204500  |
| C | 4.80269700  | 0.97452400  | 0.72361800  |
| H | 3.34901100  | 2.09122700  | -0.42168700 |
| C | -0.34027500 | 0.82748500  | 3.91286200  |
| C | -1.75859600 | 2.43742800  | 2.86250200  |
| H | 0.49872900  | 2.65471000  | 2.90304600  |
| C | -3.54106900 | -2.52110300 | 1.42629000  |
| C | -5.46469500 | -1.62646200 | 0.04859200  |
| C | -3.16467300 | 1.76709900  | -1.36553600 |
| C | -5.28657100 | 0.38722800  | -1.27189200 |
| C |             | -1.76098700 | 0.20911600  |
|   |             |             | 3.74289100  |

|   |             |             |             |
|---|-------------|-------------|-------------|
| H | -3.48421500 | 0.98704900  | 2.50401700  |
| C | 0.65873400  | 4.20551000  | -2.99331400 |
| H | 1.44683500  | 2.73886800  | -4.37503800 |
| H | -0.13614800 | 5.44550000  | -1.40851800 |
| C | 5.01812600  | -0.08836200 | 1.60355000  |
| H | 4.10775700  | -1.69961300 | 2.72267200  |
| H | 5.64283600  | 1.58512600  | 0.38624700  |
| H | 0.46622100  | 0.09174700  | 3.78986500  |
| H | -0.22160700 | 1.28800300  | 4.90504700  |
| H | -1.98431600 | 3.18224100  | 2.08692500  |
| H | -2.03290200 | 2.83945200  | 3.84936500  |
| C | -4.25738800 | -2.50306200 | 2.78545800  |
| C | -3.54122000 | -3.93105500 | 0.81716300  |
| H | -2.49569700 | -2.23104800 | 1.60272100  |
| C | -6.03782200 | -0.69524300 | -0.81414000 |
| H | -6.06200100 | -2.46887400 | 0.40371800  |
| C | -3.29381100 | 2.00844600  | -2.87543900 |
| C | -3.56200100 | 3.02642000  | -0.57916500 |
| H | -2.10235400 | 1.58255600  | -1.15657500 |
| H | -5.74648600 | 1.11198300  | -1.94630000 |
| H | -1.74217100 | -0.86185000 | 3.49857900  |
| H | -2.36677200 | 0.32641000  | 4.65287800  |
| H | 0.60923800  | 4.99810900  | -3.74310200 |
| H | 6.02841000  | -0.31646900 | 1.94814500  |
| H | -3.77270700 | -3.19728900 | 3.49019700  |
| H | -5.31064000 | -2.80927900 | 2.68710400  |
| H | -4.24401500 | -1.49771800 | 3.23244500  |
| H | -4.56617900 | -4.30772900 | 0.67509100  |
| H | -3.01580100 | -4.64108200 | 1.47528700  |
| H | -3.05022900 | -3.94582700 | -0.16877700 |
| H | -7.07620400 | -0.81198400 | -1.13218000 |
| H | -4.30633700 | 2.34067800  | -3.15182500 |
| H | -2.59254400 | 2.79637200  | -3.19235000 |
| H | -3.07353600 | 1.09924600  | -3.45404900 |
| H | -3.45842500 | 2.87366400  | 0.50415100  |
| H | -4.61189400 | 3.29504100  | -0.77602900 |
| H | -2.93084500 | 3.88134100  | -0.86949500 |



|   |            |             |             |
|---|------------|-------------|-------------|
| C | 3.32853400 | -1.07504200 | -2.00692800 |
| O | 2.12351500 | -1.24823100 | -1.91283600 |
| C | 4.36544900 | -1.89541700 | -1.37341800 |
| C | 6.38001800 | -3.37360000 | -0.12661900 |
| C | 4.03465600 | -3.01531100 | -0.59012600 |
| C | 5.71191300 | -1.52701900 | -1.53081200 |
| C | 6.71783900 | -2.26270800 | -0.90695200 |
| C | 5.03938300 | -3.75170500 | 0.02917800  |
| H | 2.98691900 | -3.29387500 | -0.47685000 |
| H | 5.96341800 | -0.65442100 | -2.13945700 |
| H | 7.76444600 | -1.97675000 | -1.02894400 |
| H | 4.78627500 | -4.62479100 | 0.63423800  |
| H | 7.16718700 | -3.95424300 | 0.36001600  |
| H | 3.72102600 | -0.21722300 | -2.60501600 |

---

#### Sn/P-PC

---

|    |             |             |             |
|----|-------------|-------------|-------------|
| Sn | -0.40790500 | -1.09441400 | -0.86513300 |
| C  | -1.07864900 | -0.96005300 | -2.89121700 |
| C  | 0.07427900  | -2.97121400 | 0.06828800  |
| H  | -0.51524000 | -1.67691400 | -3.50128100 |
| H  | -2.15294000 | -1.18785700 | -2.91330400 |
| H  | -0.90929700 | 0.06112300  | -3.25390900 |
| P  | 0.82482500  | 0.90455200  | 0.14031100  |
| N  | -1.98945200 | -0.26922700 | 0.36227000  |
| H  | 0.51609800  | -3.63996500 | -0.68104100 |
| H  | -0.84603900 | -3.41190300 | 0.46923900  |
| H  | 0.78712800  | -2.80034900 | 0.88478000  |
| C  | 0.79927600  | 2.28529300  | -1.04843400 |
| C  | 2.52911500  | 0.62845300  | 0.68667000  |
| C  | -0.30347500 | 1.13437100  | 1.44938700  |
| C  | -3.36675500 | -0.42475000 | 0.00614300  |
| C  | -1.57565100 | 0.58290900  | 1.31892000  |
| C  | 1.17774500  | 2.07225600  | -2.38503900 |

|   |             |             |             |
|---|-------------|-------------|-------------|
| C | 0.30569800  | 3.53546900  | -0.64843600 |
| C | 2.77681100  | -0.37730300 | 1.63523000  |
| C | 3.59563800  | 1.37585500  | 0.16442300  |
| C | -0.26750800 | 1.87058600  | 2.78575400  |
| C | -4.11792600 | -1.50663700 | 0.51471700  |
| C | -3.93444600 | 0.49446400  | -0.91326400 |
| C | -2.35202500 | 1.01396700  | 2.55469400  |
| C | 1.07513800  | 3.11377000  | -3.30909400 |
| H | 1.52851500  | 1.08783700  | -2.70260500 |
| C | 0.20985000  | 4.57336200  | -1.57767900 |
| H | -0.01951300 | 3.68738400  | 0.38230400  |
| C | 4.08235800  | -0.63970100 | 2.04763000  |
| H | 1.94563600  | -0.95033200 | 2.05273000  |
| C | 4.89959600  | 1.11504800  | 0.59276800  |
| H | 3.40693500  | 2.16519300  | -0.56527500 |
| C | -0.31656500 | 0.79281800  | 3.90926900  |
| C | -1.72210400 | 2.39601100  | 2.83768000  |
| H | 0.53369000  | 2.61210600  | 2.89960700  |
| C | -3.52276100 | -2.50470900 | 1.49451300  |
| C | -5.45030300 | -1.64649100 | 0.10114700  |
| C | -3.14089700 | 1.68337500  | -1.43995600 |
| C | -5.26840900 | 0.31268300  | -1.29634300 |
| C | -1.73368900 | 0.17134900  | 3.72255200  |
| H | -3.44231900 | 0.94567600  | 2.46506300  |
| C | 0.59300800  | 4.36376900  | -2.90613600 |
| H | 1.36289800  | 2.94740000  | -4.34946800 |
| H | -0.17262700 | 5.54735600  | -1.26507400 |
| C | 5.14508700  | 0.10621700  | 1.52698100  |
| H | 4.27310000  | -1.42824100 | 2.77798600  |
| H | 5.72751700  | 1.70427900  | 0.19265800  |
| H | 0.49178600  | 0.05655100  | 3.80271800  |
| H | -0.21247700 | 1.25892900  | 4.90069200  |
| H | -1.93922100 | 3.14068600  | 2.05967100  |
| H | -2.00765500 | 2.79927700  | 3.82112400  |
| C | -4.24114300 | -2.46358000 | 2.85171400  |
| C | -3.51510700 | -3.92771900 | 0.91531100  |
| H | -2.47859300 | -2.20426600 | 1.66515100  |

|   |             |             |              |
|---|-------------|-------------|--------------|
| C | -6.02363800 | -0.74760700 | -0.79465200  |
| H | -6.04897500 | -2.47328900 | 0.48952200   |
| C | -3.34611700 | 1.94586600  | -2.93733900  |
| C | -3.45773800 | 2.94706800  | -0.62450200  |
| H | -2.07376900 | 1.46615300  | -1.28947500  |
| H | -5.72744200 | 1.01212400  | -1.99732400  |
| H | -1.70800200 | -0.89980000 | 3.48099300   |
| H | -2.35072200 | 0.28826200  | 4.62510500   |
| H | 0.50862200  | 5.17519700  | -3.63226700  |
| H | 6.16639300  | -0.10111800 | 1.85184700   |
| H | -3.75087700 | -3.13667900 | 3.57297300   |
| H | -5.29092300 | -2.78306700 | 2.75839200   |
| H | -4.23924700 | -1.44863900 | 3.27600700   |
| H | -4.53824300 | -4.30894600 | 0.77287600   |
| H | -2.99443900 | -4.62391400 | 1.59224400   |
| H | -3.01676000 | -3.96284200 | -0.06653700  |
| H | -7.06345600 | -0.87231500 | -1.10482700  |
| H | -4.35915400 | 2.31910900  | -3.15288900  |
| H | -2.63630100 | 2.71304800  | -3.28482000  |
| H | -3.19118500 | 1.03772500  | -3.53801800  |
| H | -3.29126200 | 2.78497300  | 0.44887200   |
| H | -4.51175600 | 3.23893600  | -0.75556400  |
| H | -2.82530900 | 3.78867300  | -0.94839700  |
| C | 3.25296500  | -1.08078900 | -1.99724900  |
| O | 2.03430000  | -1.21376800 | -1.98026700  |
| C | 4.21970900  | -1.91621000 | -1.28770200  |
| C | 6.11586800  | -3.45466800 | 0.06620100   |
| C | 3.80763500  | -2.99963100 | -0.49007300  |
| C | 5.58729200  | -1.61217700 | -1.40086200  |
| C | 6.53392700  | -2.37997500 | -0.72525600  |
| C | 4.75342500  | -3.76480600 | 0.18328200   |
| H | 2.74554700  | -3.22650600 | -0.41264400  |
| H | 5.90198700  | -0.76735900 | -2.01876500  |
| H | 7.59654200  | -2.14616000 | -0.81507000  |
| H | 4.43793800  | -4.60943800 | 0.79929200   |
| H | 6.85668900  | -4.06001900 | 0.59374000   |
| H | 3.70184200  | -0.25571600 | - 2.59740100 |

---

Pb/P-PC

---

|    |             |             |              |
|----|-------------|-------------|--------------|
| Pb | -0.38097800 | -1.15296900 | -0.97336100  |
| C  | -1.11043900 | -0.85617700 | -3.06324400  |
| C  | 0.08515600  | -3.09272000 | 0.05919100   |
| H  | -0.56548200 | -1.55357400 | -3.70929300  |
| H  | -2.18858800 | -1.05682800 | -3.05204100  |
| H  | -0.90230200 | 0.18680800  | -3.32605000  |
| P  | 0.84302300  | 0.90788500  | 0.12196900   |
| N  | -2.02325800 | -0.23653500 | 0.34935700   |
| H  | 0.48140100  | -3.78879500 | -0.68964900  |
| H  | -0.84965100 | -3.46311400 | 0.49330400   |
| H  | 0.82642800  | -2.87998100 | 0.83808700   |
| C  | 0.79869300  | 2.27180800  | -1.08620800  |
| C  | 2.54841700  | 0.65240100  | 0.67102200   |
| C  | -0.28817300 | 1.12075100  | 1.42351200   |
| C  | -3.39903100 | -0.40334700 | 0.02027100   |
| C  | -1.57672700 | 0.59013600  | 1.29998100   |
| C  | 1.24901800  | 2.06746300  | -2.40228100  |
| C  | 0.21403600  | 3.49445400  | -0.72631200  |
| C  | 2.80241200  | -0.35984500 | 1.61187900   |
| C  | 3.60954600  | 1.42010900  | 0.16655500   |
| C  | -0.22489900 | 1.84054500  | 2.76904500   |
| C  | -4.13397000 | -1.49757800 | 0.52867200   |
| C  | -3.98912500 | 0.51317300  | -0.88947800  |
| C  | -2.32634200 | 1.02414100  | 2.55509000   |
| C  | 1.12865500  | 3.09144000  | -3.34323400  |
| H  | 1.66801700  | 1.10102100  | -2.69156700  |
| C  | 0.09989300  | 4.51518100  | -1.67273400  |
| H  | -0.16623800 | 3.63557700  | 0.28684800   |
| C  | 4.10633300  | -0.60383200 | 2.03926900   |
| H  | 1.97505400  | -0.95072100 | 2.01218000   |
| C  | 4.91210500  | 1.17732300  | 0.60952100   |
| H  | 3.41670800  | 2.21311500  | - 0.55803300 |

|   |             |             |             |
|---|-------------|-------------|-------------|
| C | -0.27996100 | 0.75541500  | 3.88390000  |
| C | -1.66897000 | 2.39155500  | 2.84265900  |
| H | 0.58996200  | 2.56757400  | 2.87949200  |
| C | -3.51417200 | -2.49674800 | 1.49155300  |
| C | -5.46941100 | -1.64931600 | 0.13041800  |
| C | -3.21053800 | 1.71125300  | -1.41684500 |
| C | -5.32540100 | 0.31959300  | -1.25746800 |
| C | -1.70928700 | 0.15967200  | 3.70665600  |
| H | -3.41889500 | 0.97558600  | 2.47911500  |
| C | 0.55572400  | 4.31525000  | -2.97923300 |
| H | 1.47366500  | 2.93177300  | -4.36718400 |
| H | -0.35323000 | 5.46791100  | -1.39036800 |
| C | 5.16254200  | 0.16539400  | 1.53933400  |
| H | 4.30142800  | -1.39650300 | 2.76396100  |
| H | 5.73495300  | 1.78416300  | 0.22540700  |
| H | 0.51441600  | 0.00632000  | 3.76257200  |
| H | -0.15774300 | 1.21074900  | 4.87840500  |
| H | -1.88252300 | 3.14786100  | 2.07477100  |
| H | -1.93564700 | 2.79050200  | 3.83328600  |
| C | -4.20968200 | -2.47096100 | 2.86093500  |
| C | -3.50419900 | -3.91605900 | 0.90322300  |
| H | -2.46979400 | -2.18733100 | 1.64634400  |
| C | -6.06374100 | -0.75136800 | -0.75280300 |
| H | -6.05451400 | -2.48492600 | 0.52086700  |
| C | -3.45303800 | 1.99884100  | -2.90385400 |
| C | -3.50908900 | 2.96086000  | -0.57312200 |
| H | -2.14018300 | 1.49084400  | -1.29416200 |
| H | -5.80028200 | 1.01806600  | -1.94884900 |
| H | -1.70364400 | -0.90909400 | 3.45387300  |
| H | -2.31399500 | 0.27662900  | 4.61759500  |
| H | 0.45772500  | 5.11264500  | -3.71908900 |
| H | 6.18281900  | -0.02669700 | 1.87658200  |
| H | -3.70139100 | -3.14349000 | 3.57025400  |
| H | -5.25783000 | -2.79973800 | 2.78252500  |
| H | -4.21036900 | -1.45843100 | 3.29070900  |
| H | -4.52625200 | -4.30523600 | 0.77572700  |
| H | -2.96671900 | -4.61293100 | 1.56642600  |

|   |             |             |             |
|---|-------------|-------------|-------------|
| H | -3.02337200 | -3.94081200 | -0.08783900 |
| H | -7.10593600 | -0.88530600 | -1.05087500 |
| H | -4.47139800 | 2.37422800  | -3.08865300 |
| H | -2.75291700 | 2.77272500  | -3.25619700 |
| H | -3.31231900 | 1.10148500  | -3.52435500 |
| H | -3.30895400 | 2.78404500  | 0.49216700  |
| H | -4.56824500 | 3.24826800  | -0.66782800 |
| H | -2.89218200 | 3.81143300  | -0.90348800 |
| C | 3.37923600  | -1.07690500 | -2.01586400 |
| O | 2.16302400  | -1.20685700 | -2.08403900 |
| C | 4.29229900  | -1.92899300 | -1.25437300 |
| C | 6.07928200  | -3.49965300 | 0.20705700  |
| C | 3.81942300  | -3.02270100 | -0.50642400 |
| C | 5.66543100  | -1.63198700 | -1.26567400 |
| C | 6.55787600  | -2.41654300 | -0.53675200 |
| C | 4.71016600  | -3.80340000 | 0.22174900  |
| H | 2.75354700  | -3.24568200 | -0.51215800 |
| H | 6.02731000  | -0.77958800 | -1.84618500 |
| H | 7.62546700  | -2.18822000 | -0.54766600 |
| H | 4.34745900  | -4.65582100 | 0.80005700  |
| H | 6.77750000  | -4.11726800 | 0.77679300  |
| H | 3.87127300  | -0.24294200 | -2.56847800 |

---

Si/N-PC

---

|    |             |             |             |
|----|-------------|-------------|-------------|
| Si | -0.34566500 | -1.58647600 | -0.39133000 |
| C  | -1.06385200 | -2.54051400 | -1.81288000 |
| C  | 0.39426300  | -2.53235700 | 1.04346000  |
| H  | -0.34932700 | -3.28031600 | -2.20539200 |
| H  | -1.98667700 | -3.06243800 | -1.52901000 |
| H  | -1.31714900 | -1.83951300 | -2.62290400 |
| N  | 0.98225600  | 1.59273800  | 0.49615400  |
| N  | -1.48127100 | -0.39703000 | 0.16856500  |

|   |             |             |                       |
|---|-------------|-------------|-----------------------|
| H | -0.04384500 | -3.54302000 | 1.05577500            |
| H | 0.11258200  | -2.03972000 | 1.98416600            |
| H | 1.48624500  | -2.63264800 | 1.02402600            |
| C | 0.76232600  | 2.68852700  | -0.41480900           |
| C | 2.28488900  | 1.20029100  | 0.77917900            |
| C | -0.09862300 | 1.31173500  | 1.38299800            |
| C | -2.86007400 | -0.52731700 | -0.28088100           |
| C | -1.20154600 | 0.54715500  | 1.16961100            |
| C | 0.82403900  | 2.47964300  | -1.79813900           |
| C | 0.50334500  | 3.97540600  | 0.07502100            |
| C | 2.52982500  | 0.09023500  | 1.62129800            |
| C | 3.40480000  | 1.87087600  | 0.22566900            |
| C | -0.27740300 | 1.98673300  | 2.74849100            |
| C | -3.70836000 | -1.49837800 | 0.30271100            |
| C | -3.31263900 | 0.31134100  | -1.32253800           |
| C | -2.13078400 | 0.78404700  | 2.36388900            |
| C | 0.64972300  | 3.54842200  | -2.68014800           |
| H | 0.98058100  | 1.47448400  | -2.18433800           |
| C | 0.31431900  | 5.03919200  | -0.80948700           |
| H | 0.46250700  | 4.14592200  | 1.15038300            |
| C | 3.82829100  | -0.32271200 | 1.90584400            |
| H | 1.68348600  | -0.42556000 | 2.06706500            |
| C | 4.69795400  | 1.44850500  | 0.52359100            |
| H | 3.25156400  | 2.74139400  | -0.41106200           |
| C | -0.21998900 | 0.89855500  | 3.86684900            |
| C | -1.79817500 | 2.25117800  | 2.70455300            |
| H | 0.38722000  | 2.84121000  | 2.92564300            |
| C | -3.27879900 | -2.39028100 | 1.46212000            |
| C | -5.01109700 | -1.62418300 | -0.19911700           |
| C | -2.42354300 | 1.38967400  | -1.91548200           |
| C | -4.62684900 | 0.15393700  | -1.78167100           |
| C | -1.49227400 | 0.04936800  | 3.58527500            |
| H | -3.18072700 | 0.54007900  | 2.17408400            |
| C | 0.39404900  | 4.83138400  | -2.18932800           |
| H | 0.70278000  | 3.37427300  | -3.75704000           |
| H | 0.11377000  | 6.03806600  | -0.41625600           |
| C |             | 4.92677400  | 0.34598500 1.35703200 |

|   |             |             |              |
|---|-------------|-------------|--------------|
| H | 3.98248400  | -1.17882000 | 2.56667100   |
| H | 5.54342000  | 1.99792600  | 0.10222600   |
| H | 0.70972300  | 0.31585300  | 3.83727900   |
| H | -0.27107100 | 1.37670900  | 4.85612300   |
| H | -2.08942000 | 2.95299400  | 1.91057800   |
| H | -2.21952300 | 2.58090700  | 3.66657100   |
| C | -4.19465300 | -2.21703400 | 2.68495300   |
| C | -3.20508800 | -3.87424300 | 1.06737500   |
| H | -2.27267300 | -2.07587000 | 1.76588100   |
| C | -5.46919600 | -0.81007400 | -1.23254400  |
| H | -5.68211800 | -2.36902600 | 0.23349700   |
| C | -2.41112000 | 1.37759700  | -3.44874000  |
| C | -2.81603300 | 2.77078800  | -1.36835300  |
| H | -1.40003400 | 1.18896700  | -1.57906200  |
| H | -4.99528600 | 0.79605400  | -2.58376700  |
| H | -1.27066900 | -1.00400200 | 3.36378000   |
| H | -2.18537300 | 0.05701800  | 4.43899400   |
| H | 0.25364200  | 5.66570100  | -2.87947700  |
| H | 5.94423400  | 0.02732100  | 1.58957800   |
| H | -3.79667500 | -2.77835700 | 3.54471600   |
| H | -5.20848900 | -2.59557500 | 2.48344800   |
| H | -4.28619800 | -1.16237600 | 2.98006100   |
| H | -4.18935900 | -4.25080500 | 0.74855700   |
| H | -2.87673900 | -4.48530200 | 1.92293000   |
| H | -2.50354800 | -4.05179400 | 0.23908100   |
| H | -6.48904700 | -0.92368500 | -1.60673500  |
| H | -3.39103800 | 1.64539000  | -3.87351600  |
| H | -1.68216300 | 2.11085800  | -3.82621300  |
| H | -2.13707300 | 0.38597500  | -3.84372300  |
| H | -2.77063300 | 2.78681500  | -0.26957200  |
| H | -3.84284800 | 3.03650600  | -1.66681200  |
| H | -2.13492900 | 3.54654600  | -1.74728500  |
| C | 2.25743000  | -0.73530200 | -1.38033400  |
| O | 0.99729400  | -0.75735800 | -1.21842500  |
| C | 3.17818400  | -1.82087100 | -1.27143400  |
| C | 5.11812400  | -3.82725400 | -1.08585500  |
| C | 2.78868900  | -3.17991900 | - 1.15965900 |



|   |            |             |             |
|---|------------|-------------|-------------|
| C | 4.55624700 | -1.49337600 | -1.32206700 |
| C | 5.51717200 | -2.49398600 | -1.21648800 |
| C | 3.75425500 | -4.16945800 | -1.07031600 |
| H | 1.73570500 | -3.45481900 | -1.18319300 |
| H | 4.85335800 | -0.45127800 | -1.43686000 |
| H | 6.57783800 | -2.23825400 | -1.24394900 |
| H | 3.45723800 | -5.21749000 | -1.00031800 |
| H | 5.87174500 | -4.61466800 | -1.01305800 |
| H | 2.66169400 | 0.22962900  | -1.70933000 |

---

Si/As-PC

---

|    |             |             |             |
|----|-------------|-------------|-------------|
| Si | -0.68562800 | -1.03053600 | -0.52062600 |
| C  | -1.08322700 | -1.16292300 | -2.32542700 |
| C  | -0.06590300 | -2.58907900 | 0.29411900  |
| H  | -0.27049600 | -1.68997900 | -2.84342900 |
| H  | -2.02293400 | -1.72521500 | -2.44851900 |
| H  | -1.21526800 | -0.17249700 | -2.78092900 |
| As | 0.75820600  | 0.77296100  | 0.10067700  |
| N  | -2.01436100 | -0.27634900 | 0.40943500  |
| H  | -0.77049200 | -3.41291300 | 0.10281800  |
| H  | 0.02700200  | -2.46550700 | 1.38304000  |
| H  | 0.91120400  | -2.85566100 | -0.13142300 |
| C  | 0.75788500  | 2.20266800  | -1.19456500 |
| C  | 2.55411800  | 0.48076900  | 0.72049400  |
| C  | -0.42092700 | 1.21504000  | 1.50390700  |
| C  | -3.39125700 | -0.38620800 | -0.00605100 |
| C  | -1.65029300 | 0.62132600  | 1.39231300  |
| C  | 1.08376200  | 1.92378800  | -2.53002000 |
| C  | 0.33344300  | 3.48108400  | -0.81127500 |
| C  | 2.82598400  | -0.59291200 | 1.57758700  |
| C  | 3.58059200  | 1.33446400  | 0.29817900  |
| C  | -0.36389700 | 1.88869300  | 2.86573600  |
| C  | -4.17312100 | -1.46793600 | 0.44965700  |

|   |             |             |              |
|---|-------------|-------------|--------------|
| C | -3.91454400 | 0.58859100  | -0.88888900  |
| C | -2.42656600 | 0.96696200  | 2.64809100   |
| C | 0.99442100  | 2.94240000  | -3.48209100  |
| H | 1.38276900  | 0.91381000  | -2.81940800  |
| C | 0.25171900  | 4.49297700  | -1.77070500  |
| H | 0.04948000  | 3.67950300  | 0.22440900   |
| C | 4.13501500  | -0.81463800 | 2.00838100   |
| H | 2.02679100  | -1.26083900 | 1.90302000   |
| C | 4.88616700  | 1.10849400  | 0.74213500   |
| H | 3.36508000  | 2.16987200  | -0.37125200  |
| C | -0.34608600 | 0.74738300  | 3.93168700   |
| C | -1.83605500 | 2.35656000  | 2.97829200   |
| H | 0.41371700  | 2.65130500  | 2.99767700   |
| C | -3.61983300 | -2.51776000 | 1.40027900   |
| C | -5.50072700 | -1.55681000 | 0.00738000   |
| C | -3.08291900 | 1.77249400  | -1.36352700  |
| C | -5.24699600 | 0.45893700  | -1.29828100  |
| C | -1.75281500 | 0.09692000  | 3.76573700   |
| H | -3.51575700 | 0.86710900  | 2.57614500   |
| C | 0.58103500  | 4.22385900  | -3.10324700  |
| H | 1.24000600  | 2.73247000  | -4.52539600  |
| H | -0.07645800 | 5.49278400  | -1.47829400  |
| C | 5.16409700  | 0.03461900  | 1.59164100   |
| H | 4.35317600  | -1.65769200 | 2.66651100   |
| H | 5.68942500  | 1.77414100  | 0.41912500   |
| H | 0.47801900  | 0.04212000  | 3.75434400   |
| H | -0.21462600 | 1.16353500  | 4.94161200   |
| H | -2.09903000 | 3.12587100  | 2.23942100   |
| H | -2.10507300 | 2.70555200  | 3.98646000   |
| C | -4.38465700 | -2.53683500 | 2.73214200   |
| C | -3.59693700 | -3.90863800 | 0.74866100   |
| H | -2.58185000 | -2.23674300 | 1.62596300   |
| C | -6.03499600 | -0.60395300 | -0.85668700  |
| H | -6.12653000 | -2.38410200 | 0.34866200   |
| C | -3.16902300 | 2.00519000  | -2.87782700  |
| C | -3.46198200 | 3.04712000  | -0.59376300  |
| H | -2.03148400 | 1.55978200  | - 1.13078000 |

|   |             |             |             |
|---|-------------|-------------|-------------|
| H | -5.67650400 | 1.20008700  | -1.97496800 |
| H | -1.71135800 | -0.96434500 | 3.48339800  |
| H | -2.34289400 | 0.16641300  | 4.69086700  |
| H | 0.50895700  | 5.01596500  | -3.85174300 |
| H | 6.18715800  | -0.14524900 | 1.92716100  |
| H | -3.92775900 | -3.25488900 | 3.43140500  |
| H | -5.43540600 | -2.83391300 | 2.58972700  |
| H | -4.38043600 | -1.54546300 | 3.20992400  |
| H | -4.61573200 | -4.27245600 | 0.54276200  |
| H | -3.10897800 | -4.64256900 | 1.40946300  |
| H | -3.05659500 | -3.89590600 | -0.21142200 |
| H | -7.07199200 | -0.68880600 | -1.18907000 |
| H | -4.16647600 | 2.35794300  | -3.18221800 |
| H | -2.44068700 | 2.77291900  | -3.18244300 |
| H | -2.95656500 | 1.08587900  | -3.44417100 |
| H | -3.37667200 | 2.89978300  | 0.49207200  |
| H | -4.50203500 | 3.33938700  | -0.80841600 |
| H | -2.80573400 | 3.88355800  | -0.88141300 |
| C | 3.31946500  | -1.00992600 | -2.01251400 |
| O | 2.11379300  | -1.19231500 | -1.94315900 |
| C | 4.34785100  | -1.85120900 | -1.39192900 |
| C | 6.33945400  | -3.37762000 | -0.16668600 |
| C | 4.00520100  | -3.01513400 | -0.68051500 |
| C | 5.69423300  | -1.46352500 | -1.48918700 |
| C | 6.68881000  | -2.22373800 | -0.87566800 |
| C | 4.99816300  | -3.77509000 | -0.07131500 |
| H | 2.95706800  | -3.31057200 | -0.62016100 |
| H | 5.95470700  | -0.55712000 | -2.04199000 |
| H | 7.73571900  | -1.92262100 | -0.95075700 |
| H | 4.73637100  | -4.68264400 | 0.47684900  |
| H | 7.11780800  | -3.97731200 | 0.31097500  |
| H | 3.71710100  | -0.12849200 | -2.57133000 |

---

Si/Sb-PC

|    |             |             |              |
|----|-------------|-------------|--------------|
| Si | -0.71425800 | -1.21932200 | -0.37126300  |
| C  | -1.11822200 | -1.62700400 | -2.13202500  |
| C  | -0.00661800 | -2.60967100 | 0.66114500   |
| H  | -0.21562000 | -2.00889200 | -2.63108700  |
| H  | -1.90898000 | -2.39318500 | -2.17052700  |
| H  | -1.47214200 | -0.73894600 | -2.67258400  |
| Sb | 0.84678300  | 0.78706100  | 0.01750800   |
| N  | -2.02459700 | -0.37841500 | 0.47874400   |
| H  | -0.68182000 | -3.47883200 | 0.62378000   |
| H  | 0.08917800  | -2.29736000 | 1.71207200   |
| H  | 0.98132600  | -2.91970100 | 0.29081600   |
| C  | 0.79634200  | 2.45497900  | -1.30418700  |
| C  | 2.83801300  | 0.56120700  | 0.71983900   |
| C  | -0.49650300 | 1.22068700  | 1.56841800   |
| C  | -3.38716000 | -0.47173800 | 0.01237700   |
| C  | -1.68885200 | 0.56185000  | 1.44732800   |
| C  | 1.12991300  | 2.29890000  | -2.65667900  |
| C  | 0.33144200  | 3.68313100  | -0.81549300  |
| C  | 3.18346000  | -0.54129400 | 1.51205600   |
| C  | 3.80909200  | 1.49097500  | 0.32848900   |
| C  | -0.50810900 | 1.91739700  | 2.92070800   |
| C  | -4.21004000 | -1.51648300 | 0.48250400   |
| C  | -3.85343300 | 0.47449600  | -0.93054600  |
| C  | -2.50767200 | 0.88052600  | 2.68669700   |
| C  | 1.00703500  | 3.39156100  | -3.52005900  |
| H  | 1.46509800  | 1.32926300  | -3.03136800  |
| C  | 0.21753600  | 4.76942600  | -1.68717600  |
| H  | 0.04239300  | 3.79221500  | 0.23252100   |
| C  | 4.50946700  | -0.71049300 | 1.91518100   |
| H  | 2.43253500  | -1.27523900 | 1.81119200   |
| C  | 5.13334100  | 1.31595200  | 0.74221900   |
| H  | 3.54140900  | 2.34842500  | -0.29410500  |
| C  | -0.44201900 | 0.79158000  | 4.00194000   |
| C  | -2.00442600 | 2.30472200  | 3.00627700   |
| H  | 0.22435400  | 2.72306200  | 3.05660700   |
| C  | -3.70669300 | -2.54472600 | 1.48352100   |
| C  | -5.52199100 | -1.59536600 | - 0.00506500 |

|   |             |             |              |
|---|-------------|-------------|--------------|
| C | -2.97374400 | 1.61302100  | -1.42922800  |
| C | -5.17308700 | 0.35761400  | -1.38334600  |
| C | -1.81057800 | 0.06603500  | 3.82948100   |
| H | -3.58813200 | 0.71968900  | 2.59440900   |
| C | 0.55424600  | 4.62326600  | -3.03667800  |
| H | 1.26004900  | 3.27762500  | -4.57659300  |
| H | -0.14115600 | 5.73055100  | -1.31203400  |
| C | 5.48272300  | 0.21646300  | 1.53065800   |
| H | 4.78464500  | -1.57478100 | 2.52292600   |
| H | 5.89329800  | 2.04244400  | 0.44566700   |
| H | 0.42055000  | 0.12878600  | 3.84163300   |
| H | -0.34341300 | 1.22630400  | 5.00784800   |
| H | -2.29873100 | 3.04775600  | 2.25246000   |
| H | -2.30768200 | 2.65265200  | 4.00522100   |
| C | -4.56082700 | -2.57503900 | 2.75880000   |
| C | -3.60523400 | -3.93776200 | 0.84292800   |
| H | -2.69365700 | -2.23935700 | 1.77962800   |
| C | -6.00168700 | -0.66743000 | -0.92688000  |
| H | -6.17880800 | -2.39452000 | 0.34486800   |
| C | -2.99063000 | 1.77168700  | -2.95520100  |
| C | -3.34701800 | 2.93366600  | -0.73926200  |
| H | -1.93811700 | 1.38461000  | -1.14342900  |
| H | -5.55956900 | 1.07770600  | -2.10713700  |
| H | -1.71064200 | -0.99711700 | 3.56786300   |
| H | -2.41604600 | 0.12163000  | 4.74569700   |
| H | 0.45824100  | 5.47298500  | -3.71616500  |
| H | 6.51921000  | 0.07853000  | 1.84527700   |
| H | -4.13444600 | -3.27688600 | 3.49278600   |
| H | -5.59190300 | -2.90012700 | 2.54982700   |
| H | -4.61230500 | -1.58079900 | 3.22808100   |
| H | -4.59696500 | -4.31747600 | 0.55113100   |
| H | -3.16356900 | -4.66217000 | 1.54570400   |
| H | -2.98480100 | -3.91942900 | -0.06773400  |
| H | -7.02759700 | -0.74326500 | -1.29403800  |
| H | -3.96776700 | 2.12433700  | -3.31943500  |
| H | -2.23583100 | 2.51127200  | -3.26490800  |
| H | -2.77124400 | 0.82252400  | - 3.46809400 |

|   |             |             |             |
|---|-------------|-------------|-------------|
| H | -3.29344500 | 2.84110200  | 0.35450100  |
| H | -4.37462500 | 3.23289500  | -0.99938800 |
| H | -2.66545400 | 3.73983200  | -1.05174700 |
| C | 3.38117400  | -0.73110000 | -2.14495500 |
| O | 2.15896800  | -0.78925300 | -2.17654700 |
| C | 4.25545100  | -1.74155900 | -1.54500600 |
| C | 5.93584200  | -3.60476900 | -0.32340100 |
| C | 3.72260100  | -2.93643100 | -1.02711800 |
| C | 5.63402100  | -1.49295600 | -1.45563400 |
| C | 6.47312500  | -2.42316300 | -0.84239000 |
| C | 4.56023000  | -3.86424200 | -0.41889500 |
| H | 2.65136500  | -3.11849100 | -1.12537700 |
| H | 6.04133500  | -0.56253000 | -1.85882900 |
| H | 7.54539500  | -2.23093800 | -0.76946200 |
| H | 4.15298500  | -4.79656400 | -0.02188900 |
| H | 6.59298300  | -4.33591200 | 0.15323900  |
| H | 3.90711300  | 0.15478200  | -2.57275500 |

---

#### Si/Bi-PC

---

|    |             |             |             |
|----|-------------|-------------|-------------|
| Si | -0.76436300 | -1.43079700 | -0.30305700 |
| C  | -1.18277500 | -2.03240900 | -2.00394000 |
| C  | 0.09129100  | -2.61039300 | 0.86448500  |
| H  | -0.26384500 | -2.30557300 | -2.54487800 |
| H  | -1.83868200 | -2.91594200 | -1.94780000 |
| H  | -1.70696400 | -1.24956400 | -2.56949000 |
| Bi | 0.90783400  | 0.69470900  | -0.25467600 |
| N  | -2.01673500 | -0.50093000 | 0.47564500  |
| H  | -0.53909300 | -3.50728100 | 0.98059100  |
| H  | 0.20791600  | -2.14274900 | 1.85322900  |
| H  | 1.07899600  | -2.92140600 | 0.49562400  |
| C  | 0.80087800  | 2.61375700  | -1.40312200 |
| C  | 2.97535000  | 0.61825200  | 0.58371200  |
| C  | -0.44766000 | 1.12558400  | 1.45966700  |

|   |             |             |             |
|---|-------------|-------------|-------------|
| C | -3.38061300 | -0.55059300 | 0.00526000  |
| C | -1.63571300 | 0.46620200  | 1.41936600  |
| C | 1.25817200  | 2.68049100  | -2.72271700 |
| C | 0.21149700  | 3.71412900  | -0.77446500 |
| C | 3.34669500  | -0.41777900 | 1.44605800  |
| C | 3.89950900  | 1.58157100  | 0.17157000  |
| C | -0.39888200 | 1.85462000  | 2.79357000  |
| C | -4.23376400 | -1.56204100 | 0.49707400  |
| C | -3.81807300 | 0.39218800  | -0.95275800 |
| C | -2.39371500 | 0.78954900  | 2.69673500  |
| C | 1.12463600  | 3.88655100  | -3.42040100 |
| H | 1.70434900  | 1.80596400  | -3.20073700 |
| C | 0.08888500  | 4.91384800  | -1.48314700 |
| H | -0.16359400 | 3.64124400  | 0.24909600  |
| C | 4.66470100  | -0.48374300 | 1.90563000  |
| H | 2.62878900  | -1.17813800 | 1.75987000  |
| C | 5.21685300  | 1.50710300  | 0.63957200  |
| H | 3.60539200  | 2.38933900  | -0.50376200 |
| C | -0.25813100 | 0.75016400  | 3.89114600  |
| C | -1.89370400 | 2.22699000  | 2.95598200  |
| H | 0.33200100  | 2.66910400  | 2.87424300  |
| C | -3.76228400 | -2.57272400 | 1.53236500  |
| C | -5.54220800 | -1.62112300 | -0.00089800 |
| C | -2.91440100 | 1.50636000  | -1.46149000 |
| C | -5.13662300 | 0.29580100  | -1.41487100 |
| C | -1.62783600 | 0.01067800  | 3.81810400  |
| H | -3.47595000 | 0.61496200  | 2.66522300  |
| C | 0.54325300  | 4.99839400  | -2.80302300 |
| H | 1.47421700  | 3.95379600  | -4.45334800 |
| H | -0.36722100 | 5.78234000  | -1.00221800 |
| C | 5.59785600  | 0.47674800  | 1.50295500  |
| H | 4.96379600  | -1.29308100 | 2.57499700  |
| H | 5.94421800  | 2.26106100  | 0.32942800  |
| H | 0.60056300  | 0.09259000  | 3.69193800  |
| H | -0.10164700 | 1.20664900  | 4.87988200  |
| H | -2.24085100 | 2.94578600  | 2.20050200  |
| H |             | -2.14432900 | 2.59776000  |
|   |             |             | 3.96149000  |

|   |             |             |              |
|---|-------------|-------------|--------------|
| C | -4.68742600 | -2.62799800 | 2.75573100   |
| C | -3.58145200 | -3.96393200 | 0.90461300   |
| H | -2.77804500 | -2.23783300 | 1.88835300   |
| C | -5.99080700 | -0.70299600 | -0.94869500  |
| H | -6.22206300 | -2.39478000 | 0.36153800   |
| C | -2.83874000 | 1.57320900  | -2.99248800  |
| C | -3.33646600 | 2.85963800  | -0.87005100  |
| H | -1.89810300 | 1.30379200  | -1.09969800  |
| H | -5.50109200 | 1.01237000  | -2.15364800  |
| H | -1.53434300 | -1.05888800 | 3.57911800   |
| H | -2.17767200 | 0.08544800  | 4.76755200   |
| H | 0.44132200  | 5.93588500  | -3.35406200  |
| H | 6.62700800  | 0.42080200  | 1.86414800   |
| H | -4.27334000 | -3.30364100 | 3.52049300   |
| H | -5.68992900 | -3.00099800 | 2.49475300   |
| H | -4.80761800 | -1.63222100 | 3.20906000   |
| H | -4.53975200 | -4.36212100 | 0.53584900   |
| H | -3.18087600 | -4.67949900 | 1.64029500   |
| H | -2.89239800 | -3.93522500 | 0.04483300   |
| H | -7.01440700 | -0.76398300 | -1.32493500  |
| H | -3.80224400 | 1.86489000  | -3.43796600  |
| H | -2.08997600 | 2.31956800  | -3.30065000  |
| H | -2.55274900 | 0.60400800  | -3.43039700  |
| H | -3.33303600 | 2.83041100  | 0.22937200   |
| H | -4.35368300 | 3.12972400  | -1.19466600  |
| H | -2.65052000 | 3.65513800  | -1.19782800  |
| C | 3.61729400  | -0.52833700 | -2.39485400  |
| O | 2.42298700  | -0.35490300 | -2.59209400  |
| C | 4.17552800  | -1.65947600 | -1.64457400  |
| C | 5.22804800  | -3.75572400 | -0.13160200  |
| C | 3.34495900  | -2.71887700 | -1.23587700  |
| C | 5.53579600  | -1.66436800 | -1.30253700  |
| C | 6.05974700  | -2.70988300 | -0.54087300  |
| C | 3.86956500  | -3.76389200 | -0.48387300  |
| H | 2.29548600  | -2.70339000 | -1.53480000  |
| H | 6.17566600  | -0.83793500 | -1.62138000  |
| H | 7.11663900  | -2.71189900 | - 0.26681700 |



|   |            |             |             |
|---|------------|-------------|-------------|
| H | 3.23275700 | -4.59591100 | -0.17441400 |
| H | 5.63985500 | -4.57789600 | 0.45840500  |
| H | 4.36249000 | 0.21015100  | -2.77269300 |

---

C/P-TS

---

|   |             |             |             |
|---|-------------|-------------|-------------|
| C | -1.15550600 | -1.62537300 | -0.52631300 |
| C | -1.98044700 | -2.40960500 | -1.50016700 |
| C | -0.14620000 | -2.39552900 | 0.28861200  |
| H | -1.33373300 | -3.08837900 | -2.06447200 |
| H | -2.71504300 | -3.01542700 | -0.95251500 |
| H | -2.51518700 | -1.75588500 | -2.19701300 |
| P | 1.62657100  | 0.50230900  | 0.07271000  |
| N | -1.73152700 | -0.53703200 | 0.04606400  |
| H | -0.14531000 | -3.44565500 | -0.02404400 |
| H | -0.41747600 | -2.33569100 | 1.35241100  |
| H | 0.88169500  | -2.03596200 | 0.18857700  |
| C | 1.84822200  | 2.25561500  | -0.40731200 |
| C | 3.06186300  | 0.03739500  | 1.08598100  |
| C | 0.21183200  | 0.59132600  | 1.19556800  |
| C | -3.08953300 | -0.14449900 | -0.32757400 |
| C | -1.09619600 | 0.25630300  | 1.02237100  |
| C | 1.32463900  | 2.69583400  | -1.63460300 |
| C | 2.47124800  | 3.18622700  | 0.44496100  |
| C | 2.92473700  | -0.99847900 | 2.02611000  |
| C | 4.34028000  | 0.56650100  | 0.83393800  |
| C | 0.28325000  | 1.34462800  | 2.53317900  |
| C | -4.18198900 | -0.87231500 | 0.20043700  |
| C | -3.26534700 | 0.95691000  | -1.18717600 |
| C | -1.87769900 | 0.84369100  | 2.19364400  |
| C | 1.42860800  | 4.03808600  | -2.00701900 |
| H | 0.81476000  | 2.00281400  | -2.30317800 |
| C | 2.57368900  | 4.52569600  | 0.06744500  |
| H | 2.88836100  | 2.86557300  | 1.40064700  |

|   |             |             |             |
|---|-------------|-------------|-------------|
| C | 4.03573900  | -1.47233200 | 2.72472600  |
| H | 1.94463300  | -1.43763600 | 2.21587400  |
| C | 5.44921700  | 0.08814700  | 1.53357800  |
| H | 4.47370300  | 1.35658400  | 0.09276200  |
| C | -0.01896100 | 0.33521500  | 3.68085900  |
| C | -1.05199400 | 2.11583400  | 2.47008100  |
| H | 1.19437700  | 1.93440200  | 2.68001100  |
| C | -4.04286100 | -1.98861200 | 1.23123400  |
| C | -5.46708500 | -0.49915100 | -0.21223900 |
| C | -2.11003100 | 1.81098700  | -1.68486700 |
| C | -4.57460200 | 1.28604600  | -1.56647500 |
| C | -1.50835300 | -0.03178200 | 3.43459400  |
| H | -2.95003900 | 0.96609600  | 2.01475400  |
| C | 2.05391100  | 4.95451000  | -1.15871400 |
| H | 1.01779100  | 4.36528600  | -2.96486100 |
| H | 3.06386700  | 5.23880900  | 0.73409300  |
| C | 5.30005700  | -0.92824800 | 2.48211200  |
| H | 3.91347800  | -2.27029100 | 3.46029600  |
| H | 6.43585800  | 0.51336000  | 1.33721000  |
| H | 0.65044000  | -0.53330500 | 3.66124200  |
| H | 0.11738200  | 0.82927300  | 4.65386400  |
| H | -1.08681100 | 2.84023300  | 1.64495300  |
| H | -1.31751600 | 2.61222400  | 3.41551300  |
| C | -4.62330900 | -1.55460500 | 2.58968000  |
| C | -4.71353100 | -3.30031600 | 0.78834800  |
| H | -2.97097300 | -2.18780600 | 1.38021000  |
| C | -5.66511400 | 0.56002700  | -1.09619500 |
| H | -6.33096500 | -1.04386600 | 0.17306500  |
| C | -1.95136100 | 1.72001700  | -3.20880700 |
| C | -2.27110900 | 3.26481200  | -1.21263500 |
| H | -1.18758600 | 1.41634100  | -1.24567300 |
| H | -4.73932200 | 2.12885100  | -2.24030200 |
| H | -1.66683800 | -1.10259700 | 3.24487100  |
| H | -2.14378800 | 0.24343400  | 4.28857800  |
| H | 2.13803500  | 6.00320400  | -1.45196900 |
| H | 6.16947100  | -1.29799600 | 3.02993000  |
| H | -4.43214700 | -2.32488500 | 3.35316900  |

|   |             |             |             |
|---|-------------|-------------|-------------|
| H | -5.71326200 | -1.41567400 | 2.52141100  |
| H | -4.19110900 | -0.60944700 | 2.94279800  |
| H | -5.80724200 | -3.18935300 | 0.73700700  |
| H | -4.49984100 | -4.10122700 | 1.51281800  |
| H | -4.37670900 | -3.63916700 | -0.20216300 |
| H | -6.67693500 | 0.82830500  | -1.40780400 |
| H | -2.86580900 | 2.03989800  | -3.73205000 |
| H | -1.13482200 | 2.37689900  | -3.55053100 |
| H | -1.71093700 | 0.69179900  | -3.51557800 |
| H | -2.42491700 | 3.31736400  | -0.12386600 |
| H | -3.13331300 | 3.75374300  | -1.69212700 |
| H | -1.37341700 | 3.85186300  | -1.45797800 |
| C | 1.21268100  | -0.66847000 | -1.94592000 |
| O | -0.05239400 | -0.82722200 | -1.99563300 |
| C | 2.17771100  | -1.81065300 | -1.94644600 |
| C | 3.99341900  | -3.94932600 | -2.05702000 |
| C | 1.72766500  | -3.11262800 | -2.21294400 |
| C | 3.55473600  | -1.58616300 | -1.78029600 |
| C | 4.45534100  | -2.64876000 | -1.82111900 |
| C | 2.62978900  | -4.17617600 | -2.26777000 |
| H | 0.66852500  | -3.27836400 | -2.40697800 |
| H | 3.92506300  | -0.57319000 | -1.61199100 |
| H | 5.52189500  | -2.46351900 | -1.67338600 |
| H | 2.26887800  | -5.18422700 | -2.48598100 |
| H | 4.69887400  | -4.78264700 | -2.09270400 |
| H | 1.61081700  | 0.21347800  | -2.48203600 |

---

Si/P-TS

---

|    |             |             |             |
|----|-------------|-------------|-------------|
| Si | -0.37561700 | -1.47430600 | -0.60312200 |
| C  | -1.27382100 | -2.51162800 | -1.87499600 |
| C  | 0.51036100  | -2.34342700 | 0.80155100  |
| H  | -0.55454500 | -3.18023300 | -2.36972700 |
| H  | -2.08889300 | -3.10763200 | -1.45177900 |

|   |             |             |              |
|---|-------------|-------------|--------------|
| H | -1.71908400 | -1.86002100 | -2.64398800  |
| P | 1.13958200  | 0.99488400  | 0.15321100   |
| N | -1.64471800 | -0.43003900 | 0.11282000   |
| H | 0.16689800  | -3.39140300 | 0.81930500   |
| H | 0.22529100  | -1.87789900 | 1.75499100   |
| H | 1.60588200  | -2.34005000 | 0.72796800   |
| C | 1.23948200  | 2.55831000  | -0.80057000  |
| C | 2.66527700  | 0.90703000  | 1.15781100   |
| C | -0.22580900 | 1.24680100  | 1.24906700   |
| C | -3.01624400 | -0.69865600 | -0.27570800  |
| C | -1.40254500 | 0.59342300  | 1.01801700   |
| C | 0.65725100  | 2.56324600  | -2.08012600  |
| C | 1.73936000  | 3.75946900  | -0.26900500  |
| C | 2.65111500  | 0.16894800  | 2.35415000   |
| C | 3.87563800  | 1.47983800  | 0.72903700   |
| C | -0.47466000 | 2.25723900  | 2.36125000   |
| C | -3.64037300 | -1.88557400 | 0.18117100   |
| C | -3.69153500 | 0.19391800  | -1.13733500  |
| C | -2.42266600 | 1.17689500  | 1.98891200   |
| C | 0.56932400  | 3.74947200  | -2.81410700  |
| H | 0.25577700  | 1.63626000  | -2.49827900  |
| C | 1.65714800  | 4.94091200  | -1.00766800  |
| H | 2.19239300  | 3.77107500  | 0.72423000   |
| C | 3.81058400  | 0.02922100  | 3.11742100   |
| H | 1.72022100  | -0.28608000 | 2.69593400   |
| C | 5.03354900  | 1.34633300  | 1.50170700   |
| H | 3.91176200  | 2.06041400  | -0.19525600  |
| C | -0.67066300 | 1.45341400  | 3.67982500   |
| C | -1.93579400 | 2.64647100  | 2.04017000   |
| H | 0.25978200  | 3.07029600  | 2.42154400   |
| C | -3.08508600 | -2.71766700 | 1.33226700   |
| C | -4.87887400 | -2.23790600 | -0.36859600  |
| C | -3.12221600 | 1.54994700  | -1.53170900  |
| C | -4.95140400 | -0.18149600 | -1.62465800  |
| C | -1.99600800 | 0.68014500  | 3.41064000   |
| H | -3.47220000 | 0.99243300  | 1.73637900   |
| C | 1.06993400  | 4.93877400  | - 2.27813600 |

|   |             |             |              |
|---|-------------|-------------|--------------|
| H | 0.11011900  | 3.74433900  | -3.80524500  |
| H | 2.04779300  | 5.87057300  | -0.58800100  |
| C | 5.00458100  | 0.62562400  | 2.69859800   |
| H | 3.77739200  | -0.53577400 | 4.05164800   |
| H | 5.95998800  | 1.82426800  | 1.17407300   |
| H | 0.18048300  | 0.79142600  | 3.88615200   |
| H | -0.77061700 | 2.13735700  | 4.53572800   |
| H | -2.03184100 | 3.16902300  | 1.07850900   |
| H | -2.42232700 | 3.23564600  | 2.83271700   |
| C | -3.99775600 | -2.52290000 | 2.55797200   |
| C | -2.91831700 | -4.21271700 | 1.02241600   |
| H | -2.09787700 | -2.31575300 | 1.59682500   |
| C | -5.52337800 | -1.40537200 | -1.28183600  |
| H | -5.35593900 | -3.17189900 | -0.06235400  |
| C | -2.86887200 | 1.63823400  | -3.04264800  |
| C | -4.04359300 | 2.68777800  | -1.05727700  |
| H | -2.15419700 | 1.68095300  | -1.02954300  |
| H | -5.49052800 | 0.49418500  | -2.29214900  |
| H | -1.87434000 | -0.41170400 | 3.43971900   |
| H | -2.77333300 | 0.94395200  | 4.14229700   |
| H | 1.00354300  | 5.86701800  | -2.84979800  |
| H | 5.90568400  | 0.53720900  | 3.30936800   |
| H | -3.58755300 | -3.03716800 | 3.44154600   |
| H | -5.00212300 | -2.93153700 | 2.36420100   |
| H | -4.11590000 | -1.45663400 | 2.80026800   |
| H | -3.87767100 | -4.68227000 | 0.75537400   |
| H | -2.53332400 | -4.74276900 | 1.90776000   |
| H | -2.21854900 | -4.39543700 | 0.19336000   |
| H | -6.48736700 | -1.69792600 | -1.70335400  |
| H | -3.80587900 | 1.53283100  | -3.61158900  |
| H | -2.42492500 | 2.61129400  | -3.30385300  |
| H | -2.18452100 | 0.84369600  | -3.38005400  |
| H | -4.22809300 | 2.63393400  | 0.02584000   |
| H | -5.02258400 | 2.65098000  | -1.56056200  |
| H | -3.59333600 | 3.66853800  | -1.27795700  |
| C | 2.27661400  | -1.02538900 | -1.79541500  |
| O | 1.07448600  | -1.38735100 | - 1.81673200 |

|   |            |             |             |
|---|------------|-------------|-------------|
| C | 3.34720400 | -1.96101000 | -1.62040100 |
| C | 5.40530800 | -3.77012700 | -1.12299400 |
| C | 3.06767000 | -3.34774600 | -1.54319500 |
| C | 4.67038200 | -1.49232900 | -1.44931300 |
| C | 5.69270700 | -2.40022600 | -1.19325700 |
| C | 4.09496000 | -4.24514800 | -1.30020600 |
| H | 2.04136400 | -3.68891300 | -1.68235500 |
| H | 4.87621700 | -0.42058800 | -1.48773000 |
| H | 6.71546800 | -2.04997400 | -1.04463000 |
| H | 3.88817800 | -5.31552700 | -1.24551300 |
| H | 6.21123200 | -4.48142500 | -0.92733300 |
| H | 2.52111200 | 0.04427800  | -1.91198400 |

---

#### Ge/P-TS

---

|    |             |             |             |
|----|-------------|-------------|-------------|
| Ge | -0.60428400 | -1.53732300 | -0.54229000 |
| C  | -1.70478400 | -2.58204300 | -1.75627800 |
| C  | 0.40867900  | -2.48858400 | 0.82560100  |
| H  | -1.08055800 | -3.32345700 | -2.27456200 |
| H  | -2.50083700 | -3.09428800 | -1.20279200 |
| H  | -2.16825000 | -1.91684400 | -2.49685400 |
| P  | 1.34706400  | 0.69546300  | 0.33320900  |
| N  | -1.71388300 | -0.25435400 | 0.21088000  |
| H  | 0.18329700  | -3.56269900 | 0.75188100  |
| H  | 0.04745800  | -2.10028400 | 1.78840000  |
| H  | 1.48908900  | -2.32584000 | 0.76237000  |
| C  | 1.78324100  | 2.29682900  | -0.45992100 |
| C  | 2.78937800  | 0.28932000  | 1.38215800  |
| C  | -0.02134500 | 1.13018100  | 1.39443900  |
| C  | -3.06280500 | -0.18067600 | -0.30358600 |
| C  | -1.29033200 | 0.70385800  | 1.11860400  |
| C  | 1.26940600  | 2.53860400  | -1.74587400 |
| C  | 2.50829200  | 3.31235000  | 0.18706800  |
| C  | 2.62582600  | -0.36541500 | 2.61395400  |

|   |             |             |             |
|---|-------------|-------------|-------------|
| C | 4.09269500  | 0.50995700  | 0.90174000  |
| C | -0.14147200 | 2.16409900  | 2.51465700  |
| C | -4.05966900 | -1.01963800 | 0.24531200  |
| C | -3.34237300 | 0.70871600  | -1.36418500 |
| C | -2.23079500 | 1.45233800  | 2.05639100  |
| C | 1.46805200  | 3.77202300  | -2.37217900 |
| H | 0.68806900  | 1.76574100  | -2.25167700 |
| C | 2.70695500  | 4.54360600  | -0.44089600 |
| H | 2.91845400  | 3.14006600  | 1.18435400  |
| C | 3.73672000  | -0.78563700 | 3.34890300  |
| H | 1.62177800  | -0.53978700 | 3.00417400  |
| C | 5.20187700  | 0.09604900  | 1.64119200  |
| H | 4.24293300  | 1.02695300  | -0.04820800 |
| C | -0.53615800 | 1.40627200  | 3.81752900  |
| C | -1.49720500 | 2.80951400  | 2.14669700  |
| H | 0.71934400  | 2.83592900  | 2.61870000  |
| C | -3.81220000 | -1.89733700 | 1.46641300  |
| C | -5.33796000 | -0.98022600 | -0.32718300 |
| C | -2.29003000 | 1.65984800  | -1.91568400 |
| C | -4.63678700 | 0.71268400  | -1.89985200 |
| C | -1.95973900 | 0.87277300  | 3.48428300  |
| H | -3.28345300 | 1.45977700  | 1.75365900  |
| C | 2.18732500  | 4.77650300  | -1.71945600 |
| H | 1.05971600  | 3.94814300  | -3.37032100 |
| H | 3.26637200  | 5.32966700  | 0.07183500  |
| C | 5.02839500  | -0.55602400 | 2.86584900  |
| H | 3.59222400  | -1.28580700 | 4.30946000  |
| H | 6.20828000  | 0.29071000  | 1.26202900  |
| H | 0.17470500  | 0.60757900  | 4.06597100  |
| H | -0.55935400 | 2.10048600  | 4.67078500  |
| H | -1.46640500 | 3.34725200  | 1.18868700  |
| H | -1.90390600 | 3.46723600  | 2.93054100  |
| C | -4.65284400 | -1.41134300 | 2.66013000  |
| C | -4.07832800 | -3.38730600 | 1.20390200  |
| H | -2.75288800 | -1.78876900 | 1.74273500  |
| C | -5.62443700 | -0.13180800 | -1.39552000 |
| H | -6.12678500 | -1.61813800 | 0.07684300  |

|   |             |             |             |
|---|-------------|-------------|-------------|
| C | -1.96284500 | 1.36335500  | -3.38644600 |
| C | -2.70478100 | 3.12608400  | -1.71945500 |
| H | -1.36957000 | 1.51199400  | -1.33788800 |
| H | -4.87611500 | 1.38919000  | -2.72306600 |
| H | -2.02238400 | -0.22424300 | 3.49760100  |
| H | -2.71314500 | 1.25102200  | 4.19053500  |
| H | 2.34386100  | 5.74208400  | -2.20554000 |
| H | 5.89679600  | -0.87519500 | 3.44615300  |
| H | -4.39064500 | -1.97086800 | 3.57182100  |
| H | -5.72751100 | -1.56225100 | 2.47329900  |
| H | -4.49701100 | -0.34185300 | 2.85847800  |
| H | -5.12612200 | -3.56559800 | 0.91670100  |
| H | -3.88035600 | -3.97803000 | 2.11185600  |
| H | -3.44336500 | -3.78885700 | 0.40024900  |
| H | -6.62718000 | -0.11926200 | -1.82832100 |
| H | -2.85154200 | 1.46982800  | -4.02764800 |
| H | -1.20201700 | 2.06693600  | -3.76114400 |
| H | -1.57129700 | 0.34287200  | -3.51420000 |
| H | -2.95733300 | 3.33067700  | -0.66828300 |
| H | -3.58379900 | 3.38467400  | -2.33064900 |
| H | -1.88213100 | 3.79851100  | -2.00970300 |
| C | 1.71259400  | -0.88455900 | -2.51035800 |
| O | 0.50033600  | -0.95313600 | -2.24268700 |
| C | 2.73945300  | -1.78575000 | -2.03992400 |
| C | 4.76039300  | -3.43556600 | -1.05155900 |
| C | 2.43285900  | -3.09298400 | -1.60078500 |
| C | 4.07571400  | -1.33202700 | -2.01999700 |
| C | 5.07708000  | -2.14787400 | -1.50101600 |
| C | 3.44287100  | -3.91534800 | -1.11931100 |
| H | 1.41115900  | -3.46655000 | -1.68175800 |
| H | 4.31173900  | -0.32837300 | -2.38273700 |
| H | 6.10679600  | -1.78860100 | -1.45013000 |
| H | 3.21452400  | -4.93418900 | -0.79861100 |
| H | 5.54933000  | -4.08113400 | -0.65817200 |
| H | 2.03814900  | -0.04737300 | -3.15850400 |



Sn/P-TS

---

|    |             |             |             |
|----|-------------|-------------|-------------|
| Sn | -0.68224700 | -1.67052500 | -0.63843000 |
| C  | -2.06410300 | -2.52269500 | -2.03629800 |
| C  | 0.50718500  | -2.68994300 | 0.83082000  |
| H  | -1.50452400 | -3.15217200 | -2.73998500 |
| H  | -2.82959600 | -3.10639200 | -1.51120800 |
| H  | -2.54529900 | -1.69070400 | -2.56757800 |
| P  | 1.41080900  | 0.77947000  | 0.22437200  |
| N  | -1.74231800 | -0.14745900 | 0.29052200  |
| H  | 0.40637600  | -3.77540500 | 0.69826000  |
| H  | 0.09806400  | -2.38273200 | 1.80312800  |
| H  | 1.55764000  | -2.38986800 | 0.75481200  |
| C  | 1.67269200  | 2.42258400  | -0.56340400 |
| C  | 2.91716500  | 0.47856600  | 1.21876400  |
| C  | 0.09396700  | 1.11937900  | 1.38978200  |
| C  | -3.10694800 | -0.01274200 | -0.14182300 |
| C  | -1.20897300 | 0.75070800  | 1.18564700  |
| C  | 1.16361600  | 2.61051100  | -1.85895400 |
| C  | 2.24456100  | 3.51759600  | 0.10808600  |
| C  | 2.84997600  | -0.37922400 | 2.33074000  |
| C  | 4.17138700  | 0.97779800  | 0.82814000  |
| C  | 0.09569100  | 2.06227300  | 2.59545100  |
| C  | -4.10084600 | -0.84273100 | 0.42834700  |
| C  | -3.41231000 | 0.90531100  | -1.17250700 |
| C  | -2.04802100 | 1.47372900  | 2.23814800  |
| C  | 1.22012400  | 3.86475100  | -2.47333600 |
| H  | 0.69375000  | 1.77761900  | -2.38577400 |
| C  | 2.30348400  | 4.76892300  | -0.50751000 |
| H  | 2.64791500  | 3.39224500  | 1.11455700  |
| C  | 4.00540300  | -0.73267900 | 3.02887600  |
| H  | 1.88258000  | -0.76332200 | 2.65875000  |
| C  | 5.32606400  | 0.62928500  | 1.53350600  |
| H  | 4.24836200  | 1.65705700  | -0.02253900 |
| C  | -0.24090200 | 1.21987800  | 3.86141300  |
| C  | -1.25058300 | 2.78880400  | 2.37063500  |

|   |             |             |              |
|---|-------------|-------------|--------------|
| H | 0.98971800  | 2.68919300  | 2.69383800   |
| C | -3.81124700 | -1.76129600 | 1.60892300   |
| C | -5.40180400 | -0.76210000 | -0.08560400  |
| C | -2.35317800 | 1.82414400  | -1.76538200  |
| C | -4.72839700 | 0.95135800  | -1.64983100  |
| C | -1.71060100 | 0.78030600  | 3.59795200   |
| H | -3.11720800 | 1.54268500  | 2.00879300   |
| C | 1.79110800  | 4.94577100  | -1.79793700  |
| H | 0.81774600  | 3.99623700  | -3.48049400  |
| H | 2.74901500  | 5.61341100  | 0.02331200   |
| C | 5.24906700  | -0.23075700 | 2.63133000   |
| H | 3.93365000  | -1.39463900 | 3.89496600   |
| H | 6.29112100  | 1.03876900  | 1.22531200   |
| H | 0.44593600  | 0.37259900  | 3.98681200   |
| H | -0.16560300 | 1.84081700  | 4.76664700   |
| H | -1.26000200 | 3.39294000  | 1.45216300   |
| H | -1.57119300 | 3.40425300  | 3.22562500   |
| C | -4.62532100 | -1.34046400 | 2.84372700   |
| C | -4.04720000 | -3.24377700 | 1.28331800   |
| H | -2.74796800 | -1.64049300 | 1.86381400   |
| C | -5.71394500 | 0.11849800  | -1.12054700  |
| H | -6.18718300 | -1.39222200 | 0.33754200   |
| C | -2.07448600 | 1.48968500  | -3.23892300  |
| C | -2.72192400 | 3.30371000  | -1.58293200  |
| H | -1.42098800 | 1.66190800  | -1.21051900  |
| H | -4.98676900 | 1.64923600  | -2.44927400  |
| H | -1.83193300 | -0.31052200 | 3.54201300   |
| H | -2.39177800 | 1.14366000  | 4.38131000   |
| H | 1.83848500  | 5.92705700  | -2.27525700  |
| H | 6.15184600  | -0.49981800 | 3.18391000   |
| H | -4.33300900 | -1.93731100 | 3.72201300   |
| H | -5.70395600 | -1.49211200 | 2.68135100   |
| H | -4.47029200 | -0.27884000 | 3.08478400   |
| H | -5.09197000 | -3.43207200 | 0.99071000   |
| H | -3.83002600 | -3.87240400 | 2.16103900   |
| H | -3.40777700 | -3.59097600 | 0.45689900   |
| H | -6.73377700 | 0.16402000  | - 1.50902800 |

|   |             |             |             |
|---|-------------|-------------|-------------|
| H | -2.98513500 | 1.57408700  | -3.85202500 |
| H | -1.32897800 | 2.18265000  | -3.65961800 |
| H | -1.68423800 | 0.46603800  | -3.35609100 |
| H | -2.92635000 | 3.53288200  | -0.52585800 |
| H | -3.61666300 | 3.57698800  | -2.16435900 |
| H | -1.89272900 | 3.94702900  | -1.91686400 |
| C | 1.85794100  | -0.87816500 | -2.31090800 |
| O | 0.65623300  | -1.23562600 | -2.36265700 |
| C | 2.94741800  | -1.70254200 | -1.84380100 |
| C | 5.06887800  | -3.21556600 | -0.84300800 |
| C | 2.76590700  | -3.07633200 | -1.56343900 |
| C | 4.21369700  | -1.10951600 | -1.65340000 |
| C | 5.26497600  | -1.86177400 | -1.13807400 |
| C | 3.82406600  | -3.82678200 | -1.06969800 |
| H | 1.79992000  | -3.54272800 | -1.76469800 |
| H | 4.35454300  | -0.05375600 | -1.89274000 |
| H | 6.23674700  | -1.39703300 | -0.96208600 |
| H | 3.69367100  | -4.89135100 | -0.86312200 |
| H | 5.89606000  | -3.80806700 | -0.44466200 |
| H | 2.12690100  | 0.11608900  | -2.71280700 |

---

**Pb/P-TS**

---

|    |             |             |             |
|----|-------------|-------------|-------------|
| Pb | -0.74027000 | -1.65694000 | -0.40357200 |
| C  | -2.20962300 | -2.34940800 | -1.93486100 |
| C  | 0.57523700  | -2.26325700 | 1.30355600  |
| H  | -1.64106900 | -2.94992000 | -2.65363800 |
| H  | -3.00804000 | -2.90969600 | -1.43950400 |
| H  | -2.58649200 | -1.41880200 | -2.37594900 |
| P  | 1.69495700  | 0.98037800  | 0.08392600  |
| N  | -1.60851100 | 0.21451400  | 0.34197500  |
| H  | 0.25900400  | -3.26624600 | 1.61909300  |
| H  | 0.36164000  | -1.49684000 | 2.05783200  |
| H  | 1.61873600  | -2.23744800 | 0.97372500  |

|   |             |             |             |
|---|-------------|-------------|-------------|
| C | 1.88940700  | 2.47760000  | -0.97112700 |
| C | 3.20511100  | 0.86581000  | 1.10284600  |
| C | 0.36843100  | 1.49146200  | 1.18301400  |
| C | -3.01144100 | 0.23009700  | 0.07999500  |
| C | -0.96516700 | 1.17960100  | 1.06352200  |
| C | 1.17961900  | 2.49073300  | -2.18586200 |
| C | 2.59526700  | 3.62841400  | -0.58118000 |
| C | 3.13163500  | 0.25405000  | 2.36628100  |
| C | 4.47057600  | 1.21241800  | 0.59535000  |
| C | 0.45694800  | 2.62227700  | 2.21818400  |
| C | -3.82347400 | -0.77860700 | 0.66400900  |
| C | -3.55116000 | 1.14667200  | -0.85479500 |
| C | -1.72064700 | 2.10936300  | 2.01758700  |
| C | 1.17910800  | 3.63045000  | -2.99482800 |
| H | 0.60898300  | 1.61042000  | -2.49419200 |
| C | 2.59787600  | 4.76325900  | -1.39585000 |
| H | 3.14518500  | 3.64214000  | 0.36157700  |
| C | 4.28687700  | 0.00517600  | 3.10847700  |
| H | 2.15790200  | -0.02224800 | 2.77354500  |
| C | 5.62562600  | 0.96919300  | 1.34349200  |
| H | 4.55728700  | 1.68965900  | -0.38319100 |
| C | 0.11946100  | 2.03322100  | 3.61756900  |
| C | -0.85383800 | 3.38025200  | 1.90691900  |
| H | 1.38589300  | 3.20451000  | 2.18201200  |
| C | -3.34652200 | -1.61240700 | 1.85129800  |
| C | -5.13858700 | -0.92823400 | 0.20564800  |
| C | -2.73375100 | 2.30077100  | -1.41758500 |
| C | -4.88297700 | 0.97674100  | -1.25520800 |
| C | -1.37382700 | 1.62385100  | 3.45998500  |
| H | -2.79403600 | 2.19561600  | 1.81460400  |
| C | 1.89094500  | 4.76739700  | -2.60268300 |
| H | 0.62529500  | 3.62843600  | -3.93655300 |
| H | 3.15238800  | 5.65189300  | -1.08496600 |
| C | 5.53885700  | 0.36405100  | 2.60047600  |
| H | 4.20787000  | -0.46534100 | 4.09127100  |
| H | 6.59980600  | 1.26027600  | 0.94341700  |
| H | 0.77210000  | 1.19161200  | 3.88302300  |

|   |             |             |              |
|---|-------------|-------------|--------------|
| H | 0.24247000  | 2.80122800  | 4.39619100   |
| H | -0.86143300 | 3.82307100  | 0.90092700   |
| H | -1.11257100 | 4.14821500  | 2.65280500   |
| C | -4.12152700 | -1.19271600 | 3.11249900   |
| C | -3.43800100 | -3.13108800 | 1.64052300   |
| H | -2.29177500 | -1.35724000 | 2.03825600   |
| C | -5.66191500 | -0.07035600 | -0.76053500  |
| H | -5.77041300 | -1.71534500 | 0.62454500   |
| C | -2.55834600 | 2.18893700  | -2.93819900  |
| C | -3.35379500 | 3.65156600  | -1.02245900  |
| H | -1.72950700 | 2.25797200  | -0.97536900  |
| H | -5.31656000 | 1.66976400  | -1.97947100  |
| H | -1.54124000 | 0.54298600  | 3.57562700   |
| H | -2.01685000 | 2.13347300  | 4.19257600   |
| H | 1.89650700  | 5.65686700  | -3.23687300  |
| H | 6.44246000  | 0.17740600  | 3.18473500   |
| H | -3.73422500 | -1.71308800 | 4.00254400   |
| H | -5.19123400 | -1.43499100 | 3.01539100   |
| H | -4.03768600 | -0.10922100 | 3.28087200   |
| H | -4.46945600 | -3.45185000 | 1.42889900   |
| H | -3.10552000 | -3.66728600 | 2.54288100   |
| H | -2.81667900 | -3.48431300 | 0.79977300   |
| H | -6.68746500 | -0.20326400 | -1.11184700  |
| H | -3.52629700 | 2.23255100  | -3.46207700  |
| H | -1.93741600 | 3.01710900  | -3.31346600  |
| H | -2.06712000 | 1.24229300  | -3.21548400  |
| H | -3.46221100 | 3.74010700  | 0.06892600   |
| H | -4.35331600 | 3.78315600  | -1.46668400  |
| H | -2.72168200 | 4.48383300  | -1.36977000  |
| C | 1.87632500  | -0.96609200 | -2.04149100  |
| O | 0.64112400  | -1.12137400 | -2.20810200  |
| C | 2.76126200  | -2.02674200 | -1.56758700  |
| C | 4.49009700  | -4.09800900 | -0.81413200  |
| C | 2.28145400  | -3.34897900 | -1.44360300  |
| C | 4.12157900  | -1.75980500 | -1.31666900  |
| C | 4.97805500  | -2.79156500 | -0.93603200  |
| C | 3.13919000  | -4.37650300 | - 1.06743600 |

|   |            |             |             |
|---|------------|-------------|-------------|
| H | 1.24187400 | -3.57138100 | -1.69434600 |
| H | 4.50130400 | -0.74170700 | -1.41622500 |
| H | 6.03341600 | -2.58389000 | -0.74711800 |
| H | 2.76749300 | -5.40095200 | -0.99305100 |
| H | 5.16768800 | -4.90975700 | -0.53834900 |
| H | 2.35727500 | -0.05854900 | -2.44656500 |

---

Si/N-TS

---

|    |             |             |             |
|----|-------------|-------------|-------------|
| Si | 0.05434700  | -0.87856400 | -0.54514800 |
| C  | -0.32573400 | -1.50566500 | -2.26704300 |
| C  | 0.87274400  | -2.05467200 | 0.65299800  |
| H  | 0.53377600  | -2.02921700 | -2.70569400 |
| H  | -1.18396600 | -2.19066900 | -2.20739400 |
| H  | -0.61967500 | -0.68878100 | -2.94280900 |
| N  | 0.59018400  | 1.14797200  | 0.52840800  |
| N  | -1.57806600 | -0.51053600 | 0.07427000  |
| H  | 0.70768700  | -3.06771400 | 0.25164900  |
| H  | 0.38673400  | -2.00452500 | 1.63548400  |
| H  | 1.94902200  | -1.90199200 | 0.78079300  |
| C  | 0.35343400  | 2.33169100  | -0.33061000 |
| C  | 1.93071500  | 1.13168400  | 1.09976100  |
| C  | -0.50169200 | 1.05702500  | 1.49873500  |
| C  | -2.81603000 | -0.97904200 | -0.49496000 |
| C  | -1.57982400 | 0.31599900  | 1.17289200  |
| C  | 0.25440400  | 2.21436200  | -1.71692300 |
| C  | 0.21911800  | 3.59151700  | 0.27184900  |
| C  | 2.20507200  | 0.32036500  | 2.20696800  |
| C  | 2.96072700  | 1.91192200  | 0.55444000  |
| C  | -0.80121000 | 1.75080500  | 2.82647300  |
| C  | -3.27197500 | -2.27767800 | -0.17084200 |
| C  | -3.55461900 | -0.13866900 | -1.35755700 |
| C  | -2.62297100 | 0.51975400  | 2.25584700  |
| C  | 0.00001900  | 3.34793400  | -2.49858800 |

|   |             |             |             |            |
|---|-------------|-------------|-------------|------------|
| H | 0.38938200  | 1.25254400  | -2.20423100 |            |
| C | -0.03353300 | 4.71670000  | -0.50987800 |            |
| H | 0.32493300  | 3.69534500  | 1.35070500  |            |
| C | 3.49396800  | 0.25896800  | 2.73619000  |            |
| H | 1.40581700  | -0.26061700 | 2.65776400  |            |
| C | 4.24916100  | 1.84991200  | 1.09375100  |            |
| H | 2.75756800  | 2.58297800  | -0.27824200 |            |
| C | -0.87019100 | 0.66439700  | 3.95175100  |            |
| C | -2.32234700 | 1.99661100  | 2.62477400  |            |
| H | -0.18197900 | 2.61718000  | 3.08601100  |            |
| C | -2.53546500 | -3.17366300 | 0.81330600  |            |
| C | -4.45410400 | -2.73664900 | -0.76642800 |            |
| C | -3.12326100 | 1.28699200  | -1.65912200 |            |
| C | -4.73681200 | -0.63825800 | -1.91982400 |            |
| C | -2.08340300 | -0.21470300 | 3.52669600  |            |
| H | -3.64899300 | 0.25961800  | 1.96985200  |            |
| C | -0.14921500 | 4.59898700  | -1.90073200 |            |
| H | -0.08118100 | 3.24136500  | -3.58246100 |            |
| H | -0.13538600 | 5.69300600  | -0.02962300 |            |
| C | 4.52699600  | 1.01859700  | 2.17926700  |            |
| H | 3.68663800  | -0.38173500 | 3.59958300  |            |
| H | 5.03773200  | 2.47059500  | 0.66181600  |            |
| H | 0.06096200  | 0.09358900  | 4.05461000  |            |
| H | -1.05483600 | 1.15244100  | 4.92038500  |            |
| H | -2.53507200 | 2.69605400  | 1.80421300  |            |
| H | -2.83810100 | 2.32457700  | 3.54047500  |            |
| C | -3.43035200 | -3.57434300 | 1.99578100  |            |
| C | -1.93871800 | -4.40952400 | 0.12293400  |            |
| H | -1.70511000 | -2.58851600 | 1.22656100  |            |
| C | -5.17981200 | -1.92925600 | -1.63959800 |            |
| H | -4.81755300 | -3.74003600 | -0.53451800 |            |
| C | -3.00025600 | 1.55301600  | -3.16504600 |            |
| C | -4.06807300 | 2.30055900  | -0.99298200 |            |
| H | -2.13029000 | 1.43485400  | -1.21888700 |            |
| H | -5.32166400 | -0.00421600 | -2.58928600 |            |
| H | -1.80614000 | -1.25489200 | 3.30436100  |            |
| H |             | -2.85794300 | -0.24287800 | 4.30684400 |

|   |             |             |             |
|---|-------------|-------------|-------------|
| H | -0.34721700 | 5.48175100  | -2.51194100 |
| H | 5.53313500  | 0.97537000  | 2.60049900  |
| H | -2.85304100 | -4.14453500 | 2.74092500  |
| H | -4.27140200 | -4.20769700 | 1.67366900  |
| H | -3.85150100 | -2.68812400 | 2.49434600  |
| H | -2.72897700 | -5.05855800 | -0.28590100 |
| H | -1.34941200 | -5.00969000 | 0.83458900  |
| H | -1.28194300 | -4.12935000 | -0.71557100 |
| H | -6.09974700 | -2.30350600 | -2.09436200 |
| H | -3.96720400 | 1.44291500  | -3.68026000 |
| H | -2.64566200 | 2.57933800  | -3.34414100 |
| H | -2.29095900 | 0.85713100  | -3.64129800 |
| H | -4.15352400 | 2.11675100  | 0.08843700  |
| H | -5.08213700 | 2.24327800  | -1.42044500 |
| H | -3.69671000 | 3.32764400  | -1.13754400 |
| C | 3.08725100  | -0.09753800 | -1.58142400 |
| O | 1.88423700  | -0.33004400 | -1.42846600 |
| C | 4.16060300  | -1.04886400 | -1.36181800 |
| C | 6.27483400  | -2.82286800 | -0.95463500 |
| C | 3.89948300  | -2.41822800 | -1.14598000 |
| C | 5.48975500  | -0.58148400 | -1.38845300 |
| C | 6.54325500  | -1.46642100 | -1.17490200 |
| C | 4.95556100  | -3.29976300 | -0.94711000 |
| H | 2.87095400  | -2.77761400 | -1.16390200 |
| H | 5.68550300  | 0.47897300  | -1.56566300 |
| H | 7.57409300  | -1.10714500 | -1.18654800 |
| H | 4.76062600  | -4.36312500 | -0.79325300 |
| H | 7.10170100  | -3.51961700 | -0.79741900 |
| H | 3.38648600  | 0.90259300  | -1.95086400 |

---

Si/As-TS

---

|    |             |             |             |
|----|-------------|-------------|-------------|
| Si | -0.49513200 | -1.67049900 | -0.48281300 |
| C  | -1.29226900 | -2.66229100 | -1.84801500 |



|    |             |             |              |
|----|-------------|-------------|--------------|
| C  | 0.29524700  | -2.44679000 | 1.03069900   |
| H  | -0.58648300 | -3.41054700 | -2.23552900  |
| H  | -2.22054300 | -3.15627100 | -1.54170400  |
| H  | -1.55344400 | -1.97549900 | -2.67122800  |
| As | 1.03288200  | 1.11037700  | -0.04916300  |
| N  | -1.74967400 | -0.55599100 | 0.09782700   |
| H  | -0.05671600 | -3.49035400 | 1.08730000   |
| H  | -0.04009900 | -1.92596200 | 1.93742000   |
| H  | 1.39255700  | -2.46007900 | 1.01287000   |
| C  | 1.13103200  | 2.92185500  | -0.76668700  |
| C  | 2.62200500  | 0.95054200  | 1.07628600   |
| C  | -0.40161700 | 1.22026800  | 1.18726300   |
| C  | -3.10841000 | -0.79842200 | -0.35428300  |
| C  | -1.53568900 | 0.49232800  | 0.99251600   |
| C  | 0.53497000  | 3.11369700  | -2.02294600  |
| C  | 1.71082400  | 4.00999200  | -0.09946900  |
| C  | 2.56490700  | 0.15463000  | 2.23090800   |
| C  | 3.85224900  | 1.50690900  | 0.69072900   |
| C  | -0.67559700 | 2.18146800  | 2.33762600   |
| C  | -3.78556700 | -1.95444000 | 0.10782300   |
| C  | -3.71974200 | 0.08886500  | -1.26718900  |
| C  | -2.56392900 | 0.99120900  | 2.00436600   |
| C  | 0.50941700  | 4.38311900  | -2.60546200  |
| H  | 0.08628800  | 2.26750500  | -2.54985000  |
| C  | 1.69205400  | 5.27712100  | -0.68997100  |
| H  | 2.18318800  | 3.87165600  | 0.87529200   |
| C  | 3.71116100  | -0.06913700 | 2.99708500   |
| H  | 1.61436000  | -0.28145700 | 2.54140400   |
| C  | 4.99745700  | 1.28874700  | 1.46467000   |
| H  | 3.91771000  | 2.13484700  | -0.20138100  |
| C  | -0.77880000 | 1.33266000  | 3.64139000   |
| C  | -2.16915600 | 2.48592700  | 2.07905000   |
| H  | 0.00668600  | 3.03834900  | 2.40007200   |
| C  | -3.27976700 | -2.79540700 | 1.27557300   |
| C  | -5.01766000 | -2.27813600 | -0.47285200  |
| C  | -3.11033100 | 1.43233400  | -1.64544900  |
| C  | -4.96805000 | -0.26532400 | - 1.79886600 |

|   |             |             |              |
|---|-------------|-------------|--------------|
| C | -2.06743300 | 0.49042900  | 3.40078500   |
| H | -3.60653400 | 0.74649800  | 1.77314200   |
| C | 1.09135500  | 5.46528200  | -1.93940600  |
| H | 0.04273700  | 4.52438300  | -3.58314700  |
| H | 2.14844700  | 6.12346600  | -0.17182100  |
| C | 4.93012600  | 0.50153400  | 2.61828700   |
| H | 3.64832400  | -0.68065100 | 3.90023200   |
| H | 5.94496400  | 1.74758400  | 1.17206600   |
| H | 0.11569300  | 0.71751100  | 3.80364000   |
| H | -0.88823600 | 1.99010500  | 4.51661500   |
| H | -2.33252500 | 3.02533000  | 1.13669600   |
| H | -2.66075800 | 3.02309300  | 2.90469100   |
| C | -4.22454300 | -2.62041400 | 2.47812100   |
| C | -3.09754600 | -4.28532500 | 0.94759300   |
| H | -2.30445300 | -2.39561200 | 1.57988500   |
| C | -5.59684300 | -1.45499300 | -1.43723400  |
| H | -5.54066100 | -3.18227900 | -0.15317600  |
| C | -2.82136600 | 1.54071000  | -3.14827600  |
| C | -4.02348400 | 2.57913300  | -1.17408800  |
| H | -2.15312900 | 1.53870500  | -1.11900200  |
| H | -5.45544100 | 0.40364200  | -2.51109900  |
| H | -1.88616400 | -0.59404800 | 3.40456800   |
| H | -2.83291300 | 0.69623900  | 4.16311400   |
| H | 1.08061600  | 6.45705800  | -2.39650000  |
| H | 5.82272100  | 0.34108300  | 3.22693300   |
| H | -3.83127500 | -3.14676600 | 3.36194900   |
| H | -5.22288400 | -3.02957300 | 2.25851100   |
| H | -4.34827100 | -1.55846100 | 2.73571400   |
| H | -4.04518000 | -4.75001800 | 0.63450500   |
| H | -2.74478700 | -4.83084000 | 1.83682700   |
| H | -2.36745800 | -4.45179600 | 0.14178300   |
| H | -6.55488200 | -1.72717500 | -1.88504900  |
| H | -3.74298300 | 1.44980600  | -3.74388500  |
| H | -2.37106800 | 2.51818000  | -3.38188400  |
| H | -2.12836700 | 0.75224600  | -3.48219800  |
| H | -4.25319200 | 2.49512600  | -0.10189600  |
| H | -4.98198500 | 2.57840100  | - 1.71677600 |

|   |             |             |             |
|---|-------------|-------------|-------------|
| H | -3.54231100 | 3.55491400  | -1.34599600 |
| C | 2.33430500  | -1.39649700 | -1.54296600 |
| O | 1.14758300  | -1.77395900 | -1.46494300 |
| C | 3.43805000  | -2.31203800 | -1.49079400 |
| C | 5.59336200  | -4.04976300 | -1.20948400 |
| C | 3.21464800  | -3.70811400 | -1.43941600 |
| C | 4.75018500  | -1.79567200 | -1.40209400 |
| C | 5.82337100  | -2.66874500 | -1.25370200 |
| C | 4.29199900  | -4.57055100 | -1.30574500 |
| H | 2.19329300  | -4.08514500 | -1.50840500 |
| H | 4.90961000  | -0.71504900 | -1.41744100 |
| H | 6.83974700  | -2.28109100 | -1.16731800 |
| H | 4.13131900  | -5.64953900 | -1.27127300 |
| H | 6.43760600  | -4.73356100 | -1.09560600 |
| H | 2.54514000  | -0.31599400 | -1.61477900 |

---

#### Si/Sb-TS

---

|    |             |             |             |
|----|-------------|-------------|-------------|
| Si | 0.64748100  | 1.68828400  | -0.52492000 |
| C  | 1.42208200  | 2.55929400  | -1.97965800 |
| C  | -0.10119700 | 2.53381900  | 0.97261800  |
| H  | 0.76831900  | 3.36298200  | -2.34435100 |
| H  | 2.41361500  | 2.96250100  | -1.74316500 |
| H  | 1.55994100  | 1.82701400  | -2.79358900 |
| Sb | -0.92987900 | -1.12088800 | -0.21020700 |
| N  | 1.90770200  | 0.61424100  | 0.10259600  |
| H  | 0.24328600  | 3.58174700  | 0.95283000  |
| H  | 0.27363600  | 2.06568400  | 1.89202300  |
| H  | -1.19765800 | 2.54123200  | 0.99222100  |
| C  | -1.16339500 | -3.21739000 | -0.63292000 |
| C  | -2.69570600 | -0.73386500 | 0.97591700  |
| C  | 0.55522000  | -1.09299300 | 1.27855400  |
| C  | 3.25601000  | 0.76229300  | -0.40544500 |
| C  | 1.68638100  | -0.36450100 | 1.07043900  |

|   |             |             |                       |
|---|-------------|-------------|-----------------------|
| C | -0.61488200 | -3.67668200 | -1.84015700           |
| C | -1.83906500 | -4.10879500 | 0.21180500            |
| C | -2.61385200 | 0.13160300  | 2.07758500            |
| C | -3.94728900 | -1.24796600 | 0.60189200            |
| C | 0.79222400  | -1.91808700 | 2.53778300            |
| C | 4.01975300  | 1.87842500  | 0.01336800            |
| C | 3.76834000  | -0.18123800 | -1.32076400           |
| C | 2.68004100  | -0.73695100 | 2.16538300            |
| C | -0.73379000 | -5.02207500 | -2.19950400           |
| H | -0.09654100 | -2.98514600 | -2.51101600           |
| C | -1.95797600 | -5.45402000 | -0.15353600           |
| H | -2.28138400 | -3.76063200 | 1.14855900            |
| C | -3.76239900 | 0.47869700  | 2.79524700            |
| H | -1.64548600 | 0.52516000  | 2.39195700            |
| C | -5.09522400 | -0.90628300 | 1.32610000            |
| H | -4.03329100 | -1.93697000 | -0.24341700           |
| C | 0.82144100  | -0.92389200 | 3.74061800            |
| C | 2.30199200  | -2.21960100 | 2.38441800            |
| H | 0.12245000  | -2.77692800 | 2.67064400            |
| C | 3.55772500  | 2.81570200  | 1.12347600            |
| C | 5.27170300  | 2.08023700  | -0.57952800           |
| C | 3.02581700  | -1.46475000 | -1.66809100           |
| C | 5.03169900  | 0.05969700  | -1.87881100           |
| C | 2.11500500  | -0.09708500 | 3.47536300            |
| H | 3.72821000  | -0.50098200 | 1.94925100            |
| C | -1.40718500 | -5.91012900 | -1.35603700           |
| H | -0.30793800 | -5.37338700 | -3.14265700           |
| H | -2.48600500 | -6.15018300 | 0.50266300            |
| C | -5.00534900 | -0.03960600 | 2.42020700            |
| H | -3.68327800 | 1.14523500  | 3.65775900            |
| H | -6.06288100 | -1.32761700 | 1.04198400            |
| H | -0.08524300 | -0.30538400 | 3.78261500            |
| H | 0.88751300  | -1.47477200 | 4.69061200            |
| H | 2.52063300  | -2.85400200 | 1.51493400            |
| H | 2.75917100  | -2.65482300 | 3.28644900            |
| C | 4.48104800  | 2.69682800  | 2.34749600            |
| C |             | 3.43576500  | 4.28031700 0.67623400 |

|   |             |             |              |
|---|-------------|-------------|--------------|
| H | 2.56363100  | 2.48182400  | 1.44603800   |
| C | 5.76796200  | 1.19117100  | -1.53260100  |
| H | 5.87348500  | 2.94251600  | -0.28385000  |
| C | 2.71419800  | -1.58558800 | -3.16527100  |
| C | 3.81412400  | -2.68542200 | -1.16116600  |
| H | 2.06636000  | -1.45546800 | -1.13529400  |
| H | 5.44615900  | -0.65194500 | -2.59603900  |
| H | 1.92840300  | 0.98026200  | 3.35765300   |
| H | 2.84384200  | -0.21227500 | 4.29089700   |
| H | -1.50767600 | -6.96043700 | -1.63929100  |
| H | -5.90115900 | 0.22151000  | 2.98848200   |
| H | 4.09364300  | 3.30091300  | 3.18303800   |
| H | 5.49694400  | 3.05387500  | 2.11798800   |
| H | 4.56155100  | 1.65435200  | 2.68826000   |
| H | 4.40522800  | 4.68408800  | 0.34545100   |
| H | 3.08647300  | 4.90768700  | 1.51143400   |
| H | 2.72664300  | 4.40401400  | -0.15602000  |
| H | 6.74288000  | 1.37085400  | -1.99113300  |
| H | 3.63263300  | -1.59839900 | -3.77243600  |
| H | 2.17402700  | -2.52472900 | -3.36784400  |
| H | 2.09071000  | -0.74812500 | -3.51731500  |
| H | 4.06956400  | -2.58029300 | -0.09632800  |
| H | 4.75800000  | -2.81086900 | -1.71502700  |
| H | 3.22539900  | -3.60859300 | -1.28404600  |
| C | -2.30396000 | 1.63779800  | -1.54635100  |
| O | -1.11318100 | 1.97730300  | -1.46367400  |
| C | -3.39677400 | 2.57081600  | -1.45752100  |
| C | -5.52917500 | 4.32151300  | -1.09544200  |
| C | -3.15747700 | 3.96128900  | -1.37819500  |
| C | -4.71082000 | 2.06595100  | -1.35880100  |
| C | -5.77342500 | 2.94492700  | -1.17004400  |
| C | -4.22450000 | 4.83093500  | -1.20386700  |
| H | -2.13322800 | 4.32975900  | -1.45698900  |
| H | -4.88054500 | 0.98746400  | -1.39717600  |
| H | -6.79162800 | 2.56348800  | -1.07478500  |
| H | -4.05245000 | 5.90742400  | -1.14648500  |
| H | -6.36434000 | 5.01037300  | - 0.94774200 |

|   |             |            |             |
|---|-------------|------------|-------------|
| H | -2.55150100 | 0.56487300 | -1.65182000 |
|---|-------------|------------|-------------|

---

Si/Bi-TS

---

|    |             |             |             |
|----|-------------|-------------|-------------|
| Si | 0.81726600  | 1.76257500  | -0.41052500 |
| C  | 1.41306000  | 2.58880300  | -1.96401600 |
| C  | 0.03185400  | 2.59276000  | 1.06549800  |
| H  | 0.74110300  | 3.40778300  | -2.25153000 |
| H  | 2.44017000  | 2.95841300  | -1.84377000 |
| H  | 1.42578400  | 1.84232400  | -2.77653900 |
| Bi | -0.82175400 | -1.02170600 | -0.26311100 |
| N  | 2.08245900  | 0.69998300  | 0.15117200  |
| H  | 0.30389200  | 3.66039900  | 1.00277400  |
| H  | 0.45806100  | 2.17250500  | 1.98582000  |
| H  | -1.06059100 | 2.52466200  | 1.10317800  |
| C  | -1.11393600 | -3.23479000 | -0.60633500 |
| C  | -2.61538200 | -0.62058500 | 1.06271900  |
| C  | 0.74056700  | -1.00929400 | 1.32483400  |
| C  | 3.40526200  | 0.82584600  | -0.42085200 |
| C  | 1.87070400  | -0.28352300 | 1.12576900  |
| C  | -0.61607900 | -3.74682700 | -1.81185100 |
| C  | -1.81501100 | -4.06140100 | 0.27870300  |
| C  | -2.48535200 | 0.20709400  | 2.18636800  |
| C  | -3.88126100 | -1.10868700 | 0.70863800  |
| C  | 0.97400200  | -1.82808600 | 2.58778500  |
| C  | 4.19705700  | 1.93571000  | -0.04077500 |
| C  | 3.85906400  | -0.12558200 | -1.35822300 |
| C  | 2.86365700  | -0.64394200 | 2.22359700  |
| C  | -0.81470500 | -5.09384000 | -2.13230200 |
| H  | -0.07916400 | -3.10231500 | -2.51480700 |
| C  | -2.01055700 | -5.40888700 | -0.04816000 |
| H  | -2.21959300 | -3.66528900 | 1.21376100  |
| C  | -3.60915500 | 0.54958700  | 2.94599300  |
| H  | -1.50303200 | 0.57614900  | 2.48666700  |

|   |             |             |             |
|---|-------------|-------------|-------------|
| C | -5.00395600 | -0.77038600 | 1.47410600  |
| H | -4.00241300 | -1.77154600 | -0.15342600 |
| C | 0.99696400  | -0.82643700 | 3.78656800  |
| C | 2.48747500  | -2.12664200 | 2.44516500  |
| H | 0.30619600  | -2.68766000 | 2.72468800  |
| C | 3.77940100  | 2.89819100  | 1.06559900  |
| C | 5.43055200  | 2.11115600  | -0.67939400 |
| C | 3.06149700  | -1.37765200 | -1.69673900 |
| C | 5.10484700  | 0.09051400  | -1.96287400 |
| C | 2.29310300  | -0.00111100 | 3.52882700  |
| H | 3.91208900  | -0.40600700 | 2.00822800  |
| C | -1.51366300 | -5.92323600 | -1.25058500 |
| H | -0.43114400 | -5.49102800 | -3.07564500 |
| H | -2.55899500 | -6.05927600 | 0.63788800  |
| C | -4.86995600 | 0.06277800  | 2.58932900  |
| H | -3.49640100 | 1.18957400  | 3.82484800  |
| H | -5.98597200 | -1.16688800 | 1.20369300  |
| H | 0.09012800  | -0.20783200 | 3.82042300  |
| H | 1.05569000  | -1.37422400 | 4.73879900  |
| H | 2.71468600  | -2.76276500 | 1.57887500  |
| H | 2.93795600  | -2.55919500 | 3.35189500  |
| C | 4.75129600  | 2.81947300  | 2.25404400  |
| C | 3.62656100  | 4.34645700  | 0.57621300  |
| H | 2.80141900  | 2.56937700  | 1.44091000  |
| C | 5.87600000  | 1.20694400  | -1.64332300 |
| H | 6.05764300  | 2.96452700  | -0.41221900 |
| C | 2.67650400  | -1.44819800 | -3.18042600 |
| C | 3.82377400  | -2.63755200 | -1.25271100 |
| H | 2.12912000  | -1.34818800 | -1.11920600 |
| H | 5.47637800  | -0.62637900 | -2.69802600 |
| H | 2.10843100  | 1.07652300  | 3.40767400  |
| H | 3.01590100  | -0.11506400 | 4.34994700  |
| H | -1.67695000 | -6.97324300 | -1.50453000 |
| H | -5.74609000 | 0.32339700  | 3.18757400  |
| H | 4.39630600  | 3.45053200  | 3.08393000  |
| H | 5.75721500  | 3.16865300  | 1.97419300  |
| H | 4.84492400  | 1.78816400  | 2.62503000  |

|   |             |             |             |
|---|-------------|-------------|-------------|
| H | 4.57844100  | 4.74567200  | 0.19305500  |
| H | 3.30379000  | 4.99925900  | 1.40241900  |
| H | 2.88464100  | 4.43522000  | -0.23213400 |
| H | 6.83760400  | 1.36577200  | -2.13633600 |
| H | 3.56447400  | -1.48017500 | -3.83060000 |
| H | 2.09008000  | -2.35999500 | -3.37998800 |
| H | 2.07119900  | -0.57842100 | -3.48294600 |
| H | 4.12057100  | -2.56991700 | -0.19537200 |
| H | 4.74119800  | -2.78140400 | -1.84509600 |
| H | 3.19715600  | -3.53520800 | -1.37702800 |
| C | -2.40367400 | 1.83054200  | -1.41417500 |
| O | -1.21789600 | 2.16075500  | -1.36340800 |
| C | -3.51140400 | 2.76354500  | -1.34781600 |
| C | -5.66299300 | 4.51428400  | -1.11310700 |
| C | -3.28443300 | 4.15559300  | -1.34133700 |
| C | -4.82024500 | 2.25534400  | -1.23559100 |
| C | -5.89387900 | 3.13395400  | -1.11207400 |
| C | -4.36093200 | 5.02597700  | -1.23028000 |
| H | -2.26175000 | 4.52665000  | -1.42961500 |
| H | -4.98098000 | 1.17459000  | -1.22074300 |
| H | -6.91037100 | 2.74866800  | -1.01278600 |
| H | -4.19726900 | 6.10543300  | -1.23274300 |
| H | -6.50593400 | 5.20303400  | -1.02041100 |
| H | -2.67550400 | 0.75696200  | -1.48703800 |

---

#### C/P-Prod

---

|   |             |             |            |
|---|-------------|-------------|------------|
| C | -0.72170000 | -0.64683800 | 0.98844000 |
| H | -1.32526700 | 0.26122200  | 1.11518800 |
| C | 0.74066700  | -0.40256900 | 0.58043000 |
| C | 1.21576200  | -1.59169700 | 0.05929900 |
| C | -0.69529500 | -1.58329600 | 2.22941700 |
| H | -1.70897200 | -1.72056100 | 2.63409600 |
| H | -0.06902400 | -1.17270400 | 3.03335000 |



|   |             |             |              |
|---|-------------|-------------|--------------|
| C | -0.13598200 | -2.90599900 | 1.63047500   |
| H | 0.80869100  | -3.22529500 | 2.09054800   |
| H | -0.84825000 | -3.73613100 | 1.73982100   |
| C | 0.03810700  | -2.56709700 | 0.11080200   |
| H | 0.13674100  | -3.43746800 | -0.54419100  |
| C | -1.15736200 | -1.62834900 | -0.11639900  |
| H | -1.17407600 | -1.18132500 | -1.11996900  |
| H | -2.12613900 | -2.10972700 | 0.08333400   |
| N | 2.45256300  | -2.00244300 | -0.33680100  |
| P | 1.41631900  | 1.20472200  | 0.71616900   |
| C | 0.96081100  | 1.94091500  | 2.30818100   |
| C | 0.22277300  | 2.94401800  | 4.81508700   |
| C | 1.56173200  | 1.43746700  | 3.47665500   |
| C | -0.02362300 | 2.93622200  | 2.40525100   |
| C | -0.38812700 | 3.43442300  | 3.65860700   |
| C | 1.19656800  | 1.94298800  | 4.72357600   |
| H | 2.30906400  | 0.64298500  | 3.42130800   |
| H | -0.50913200 | 3.32098800  | 1.50767400   |
| H | -1.15492700 | 4.20876900  | 3.72943200   |
| H | 1.66902500  | 1.55245000  | 5.62729700   |
| H | -0.06308100 | 3.33796900  | 5.79271000   |
| C | 0.80650100  | 2.26738000  | -0.61549000  |
| C | -0.04109600 | 3.86259100  | -2.74977500  |
| C | 1.07760900  | 3.64872000  | -0.61286600  |
| C | 0.11450000  | 1.69242800  | -1.69102200  |
| C | -0.31011300 | 2.49173200  | -2.75424800  |
| C | 0.65237600  | 4.43837300  | -1.67940200  |
| H | 1.62792900  | 4.10717500  | 0.20891300   |
| H | -0.08540000 | 0.62222700  | -1.69473500  |
| H | -0.85387000 | 2.04082200  | -3.58683700  |
| H | 0.86930000  | 5.50840400  | -1.67701100  |
| H | -0.37275600 | 4.48637300  | -3.58275500  |
| C | 2.53712000  | -3.02377200 | -1.36397500  |
| C | 2.80502300  | -4.93106700 | -3.37551500  |
| C | 2.40368000  | -2.62495600 | -2.71194000  |
| C | 2.76608400  | -4.37009200 | -1.00747100  |
| C | 2.90242900  | -5.30937300 | - 2.03795700 |

|   |             |             |             |
|---|-------------|-------------|-------------|
| C | 2.54755100  | -3.60249800 | -3.70563700 |
| H | 3.08384400  | -6.35665000 | -1.78831200 |
| H | 2.45671800  | -3.31823500 | -4.75595700 |
| H | 2.92002900  | -5.67795200 | -4.16408800 |
| C | 2.09000700  | -1.18943400 | -3.11542800 |
| H | 2.03379600  | -0.58413000 | -2.20264600 |
| C | 3.19133300  | -0.56888300 | -3.98750300 |
| H | 4.16761200  | -0.58837400 | -3.48096500 |
| H | 2.94993400  | 0.48235500  | -4.21213300 |
| H | 3.30004500  | -1.09750400 | -4.94734900 |
| C | 0.72552600  | -1.11298400 | -3.81801700 |
| H | -0.07900700 | -1.50597000 | -3.17722100 |
| H | 0.71902000  | -1.69919000 | -4.74983800 |
| H | 0.48391400  | -0.07219600 | -4.08149700 |
| C | 2.83594400  | -4.83615200 | 0.43964400  |
| H | 2.64476700  | -3.96005900 | 1.07365200  |
| C | 4.22156900  | -5.38960300 | 0.80767000  |
| H | 5.02134300  | -4.65414300 | 0.63294500  |
| H | 4.46389500  | -6.28465300 | 0.21396700  |
| H | 4.25307300  | -5.67758400 | 1.87022900  |
| C | 1.74337700  | -5.87243400 | 0.74897700  |
| H | 0.74343700  | -5.50276800 | 0.47946900  |
| H | 1.73858400  | -6.11815500 | 1.82246500  |
| H | 1.91135400  | -6.80928800 | 0.19566900  |
| C | 3.68332500  | -1.29522700 | 0.09296800  |
| C | 3.86247800  | -1.48344400 | 1.60287700  |
| H | 4.69909100  | -0.88121200 | 1.98422600  |
| H | 4.10253200  | -2.53674900 | 1.79118500  |
| H | 2.94967300  | -1.24406000 | 2.16453100  |
| C | 4.91386600  | -1.80887400 | -0.64572500 |
| H | 5.78724800  | -1.26233700 | -0.26561200 |
| H | 4.82646700  | -1.62182300 | -1.72117400 |
| H | 5.06555100  | -2.88197200 | -0.49063900 |
| C | 3.28931200  | 1.09701900  | 0.60818600  |
| O | 3.59796000  | 0.08927400  | -0.30641000 |
| C | 3.88058700  | 2.41619300  | 0.18964000  |
| C | 4.14089500  | 2.68407900  | -1.15981500 |

|   |            |            |             |
|---|------------|------------|-------------|
| C | 4.09757400 | 3.41070300 | 1.15359500  |
| C | 4.61105800 | 3.94204300 | -1.54084000 |
| H | 3.97123300 | 1.90465400 | -1.90318300 |
| C | 4.55743600 | 4.67159200 | 0.76725000  |
| H | 3.90111000 | 3.20215600 | 2.20856600  |
| C | 4.81222800 | 4.93930400 | -0.58164200 |
| H | 4.81752600 | 4.14677200 | -2.59359500 |
| H | 4.72802900 | 5.44266800 | 1.52163000  |
| H | 5.17766200 | 5.92334500 | -0.88338300 |
| H | 3.62386500 | 0.86390300 | 1.62808000  |

---

### Si/P-Prod

---

|   |             |             |             |
|---|-------------|-------------|-------------|
| C | -0.64867400 | -0.56277800 | 1.09584400  |
| H | -1.21069000 | 0.36158800  | 1.27712400  |
| C | 0.79345000  | -0.35958100 | 0.58301600  |
| C | 1.17638400  | -1.55996200 | 0.00720400  |
| C | -0.57276600 | -1.51935800 | 2.31806900  |
| H | -1.56256900 | -1.62704300 | 2.78596800  |
| H | 0.11764200  | -1.14665000 | 3.08618300  |
| C | -0.10252300 | -2.84967100 | 1.66476500  |
| H | 0.86184000  | -3.20406700 | 2.05124000  |
| H | -0.83169800 | -3.65845000 | 1.81505000  |
| C | -0.02651600 | -2.49371100 | 0.14071900  |
| H | -0.00350200 | -3.35931000 | -0.52875200 |
| C | -1.19958100 | -1.50886500 | 0.01284900  |
| H | -1.27281300 | -1.04134200 | -0.97864800 |
| H | -2.16928300 | -1.95663200 | 0.27659400  |
| N | 2.36885400  | -1.99767400 | -0.49626300 |
| P | 1.47367400  | 1.25749200  | 0.70619900  |
| C | 0.91457300  | 1.98519700  | 2.26867100  |
| C | 0.07707700  | 3.00198500  | 4.73711800  |
| C | 1.40275800  | 1.42882100  | 3.46480500  |
| C | -0.00817100 | 3.03955300  | 2.31616100  |
| C | -0.42273400 | 3.54482400  | 3.55127600  |
| C | 0.98828600  | 1.94066600  | 4.69345200  |
| H | 2.10197300  | 0.58971200  | 3.44177300  |
| H | -0.40870400 | 3.46454200  | 1.39537900  |
| H | -1.14170300 | 4.36596200  | 3.58443400  |
| H | 1.37239500  | 1.50837300  | 5.61965900  |
| H | -0.24775400 | 3.40157100  | 5.70017600  |

|    |             |             |             |
|----|-------------|-------------|-------------|
| C  | 0.92710300  | 2.29019300  | -0.67537700 |
| C  | 0.14563600  | 3.83480300  | -2.87231800 |
| C  | 1.18662700  | 3.67437300  | -0.69094200 |
| C  | 0.27726200  | 1.68849100  | -1.76320600 |
| C  | -0.11246700 | 2.46180800  | -2.85801600 |
| C  | 0.79323400  | 4.43797000  | -1.78900700 |
| H  | 1.69444300  | 4.15751100  | 0.14332000  |
| H  | 0.07920200  | 0.61796100  | -1.74854200 |
| H  | -0.62275700 | 1.99010300  | -3.70007700 |
| H  | 0.99842200  | 5.51026300  | -1.79899000 |
| H  | -0.16062300 | 4.43881300  | -3.72924700 |
| C  | 2.37487200  | -3.09222600 | -1.45195900 |
| C  | 2.51526300  | -5.13798500 | -3.34183800 |
| C  | 2.16992200  | -2.78738700 | -2.81602100 |
| C  | 2.64403900  | -4.40960400 | -1.02255700 |
| C  | 2.71148300  | -5.41976900 | -1.99187900 |
| C  | 2.24202100  | -3.83291800 | -3.74575800 |
| H  | 2.91918100  | -6.44610800 | -1.68273400 |
| H  | 2.08477000  | -3.62115300 | -4.80519300 |
| H  | 2.57294800  | -5.93913700 | -4.08185700 |
| C  | 1.84756500  | -1.37902600 | -3.29703600 |
| H  | 1.96609300  | -0.69424100 | -2.44611300 |
| C  | 2.80190400  | -0.89501200 | -4.39784500 |
| H  | 3.85292300  | -0.95364500 | -4.07712200 |
| H  | 2.58453800  | 0.15337900  | -4.65573700 |
| H  | 2.70140100  | -1.48975300 | -5.31880600 |
| C  | 0.38593700  | -1.29918500 | -3.76663000 |
| H  | -0.31162400 | -1.58737600 | -2.96576700 |
| H  | 0.20650800  | -1.97583200 | -4.61652500 |
| H  | 0.13596500  | -0.27944400 | -4.09681200 |
| C  | 2.85197700  | -4.76855600 | 0.44124200  |
| H  | 2.69265200  | -3.85510000 | 1.03013300  |
| C  | 4.28517500  | -5.25410200 | 0.70953200  |
| H  | 5.03537800  | -4.51619200 | 0.38725600  |
| H  | 4.49585600  | -6.19044600 | 0.17003500  |
| H  | 4.43608800  | -5.44799100 | 1.78328700  |
| C  | 1.82613000  | -5.80683800 | 0.92176100  |
| H  | 0.79547600  | -5.48150600 | 0.71861200  |
| H  | 1.92481500  | -5.97406800 | 2.00583500  |
| H  | 1.97306800  | -6.77704300 | 0.42274200  |
| Si | 3.94807400  | -1.28032800 | -0.06850800 |
| C  | 4.30589200  | -1.63049600 | 1.73306700  |
| H  | 5.11032000  | -0.98167800 | 2.11542500  |
| H  | 4.63514100  | -2.67240500 | 1.85551000  |
| H  | 3.41186200  | -1.49050100 | 2.36081900  |

|   |            |             |             |
|---|------------|-------------|-------------|
| C | 5.23809000 | -1.84052300 | -1.27020200 |
| H | 6.21452300 | -1.42066700 | -0.98183800 |
| H | 4.99614900 | -1.49085600 | -2.28415200 |
| H | 5.32145000 | -2.93588100 | -1.30167800 |
| C | 3.35699600 | 1.26067800  | 0.73990500  |
| C | 3.89952000 | 2.65383700  | 0.56084800  |
| C | 4.74962600 | 5.29492900  | 0.19035200  |
| C | 3.91312200 | 3.54685800  | 1.64227700  |
| C | 4.32716300 | 3.08271100  | -0.70122500 |
| C | 4.75627000 | 4.39894900  | -0.88255600 |
| C | 4.33077600 | 4.86584600  | 1.45446800  |
| H | 3.59170500 | 3.21468400  | 2.63192500  |
| H | 4.31697300 | 2.37814600  | -1.53305600 |
| H | 5.09312100 | 4.72816400  | -1.86796100 |
| H | 4.34024200 | 5.55776700  | 2.29937000  |
| H | 5.08197400 | 6.32527200  | 0.04587200  |
| O | 3.78286800 | 0.39009300  | -0.26071400 |
| H | 3.61241700 | 0.89705300  | 1.74981900  |

---

#### Ge/P-Prod

---

|   |             |             |             |
|---|-------------|-------------|-------------|
| C | -0.53393800 | -0.85281400 | 1.39314600  |
| H | -1.10398400 | 0.02819800  | 1.70976000  |
| C | 0.86232600  | -0.55377400 | 0.80274900  |
| C | 1.22535200  | -1.68962800 | 0.09149500  |
| C | -0.35767100 | -1.92857800 | 2.50208900  |
| H | -1.30967600 | -2.10211300 | 3.02549400  |
| H | 0.38468700  | -1.63147400 | 3.25543100  |
| C | 0.08219700  | -3.17753100 | 1.68846300  |
| H | 1.07260700  | -3.55251200 | 1.97683400  |
| H | -0.62769400 | -4.00924400 | 1.80214400  |
| C | 0.05473600  | -2.66659600 | 0.21026600  |
| H | 0.05065700  | -3.45863400 | -0.54548200 |
| C | -1.14089700 | -1.69869500 | 0.25691500  |
| H | -1.27670700 | -1.12899700 | -0.67265200 |
| H | -2.08561100 | -2.19252200 | 0.53068100  |
| N | 2.38536900  | -2.02902000 | -0.53195800 |
| P | 1.44100300  | 1.10739700  | 0.69702700  |

|   |             |             |              |
|---|-------------|-------------|--------------|
| C | 0.74730800  | 2.05987000  | 2.06451400   |
| C | -0.02265300 | 3.59932800  | 4.26668600   |
| C | 0.74057500  | 1.49370700  | 3.35084100   |
| C | 0.37676700  | 3.40148300  | 1.88641100   |
| C | -0.01276900 | 4.16452400  | 2.98873900   |
| C | 0.35535600  | 2.26404500  | 4.44766900   |
| H | 1.03686800  | 0.45336800  | 3.49445700   |
| H | 0.40374300  | 3.85419000  | 0.89475700   |
| H | -0.30306100 | 5.20761500  | 2.84792200   |
| H | 0.34758600  | 1.82189800  | 5.44607700   |
| H | -0.32613500 | 4.20036900  | 5.12664700   |
| C | 0.88399300  | 1.85783200  | -0.85740800  |
| C | -0.10250300 | 2.94509000  | -3.23888800  |
| C | 1.76680400  | 2.18262100  | -1.89698900  |
| C | -0.49955000 | 2.05558400  | -1.02426800  |
| C | -0.98751200 | 2.59965100  | -2.21109700  |
| C | 1.26860900  | 2.73219300  | -3.08107700  |
| H | 2.83153100  | 1.99550200  | -1.79028200  |
| H | -1.19581900 | 1.79514900  | -0.22412200  |
| H | -2.06098700 | 2.75718000  | -2.33433900  |
| H | 1.95987500  | 2.99502700  | -3.88443400  |
| H | -0.48563800 | 3.37655200  | -4.16609800  |
| C | 2.37971800  | -3.02872600 | -1.57935500  |
| C | 2.45780800  | -4.89565000 | -3.64739300  |
| C | 2.11375500  | -2.60558800 | -2.90130100  |
| C | 2.70119300  | -4.37095800 | -1.28312200  |
| C | 2.73405900  | -5.29076900 | -2.34034900  |
| C | 2.15029200  | -3.56412500 | -3.92188500  |
| H | 2.97769600  | -6.33517700 | -2.13546000  |
| H | 1.93966400  | -3.26336900 | -4.94969800  |
| H | 2.48523000  | -5.62833000 | -4.45691600  |
| C | 1.77223900  | -1.15849300 | -3.22407100  |
| H | 2.04775500  | -0.54935600 | -2.35283100  |
| C | 2.55964700  | -0.61543400 | -4.42319900  |
| H | 3.64504400  | -0.74429200 | -4.28885000  |
| H | 2.35554900  | 0.45790000  | -4.55385300  |
| H | 2.27896400  | -1.11618900 | - 5.36253400 |

|    |             |             |             |
|----|-------------|-------------|-------------|
| C  | 0.25952400  | -0.99045000 | -3.43547100 |
| H  | -0.30782900 | -1.35584400 | -2.56771400 |
| H  | -0.07920400 | -1.55908800 | -4.31623800 |
| H  | 0.00316200  | 0.06816100  | -3.58975600 |
| C  | 3.01210100  | -4.84342100 | 0.12960300  |
| H  | 2.84522100  | -3.99299600 | 0.80529800  |
| C  | 4.48193600  | -5.27002500 | 0.27275100  |
| H  | 5.17420700  | -4.46387700 | -0.01533000 |
| H  | 4.70886900  | -6.13698600 | -0.36689100 |
| H  | 4.70569700  | -5.55579200 | 1.31282700  |
| C  | 2.07051700  | -5.97261400 | 0.57498100  |
| H  | 1.01474600  | -5.68792400 | 0.45791700  |
| H  | 2.24208600  | -6.22411000 | 1.63338900  |
| H  | 2.23546700  | -6.88849700 | -0.01312500 |
| Ge | 4.07700600  | -1.30493100 | -0.09278700 |
| C  | 4.46462300  | -1.76245800 | 1.76049500  |
| H  | 5.21723200  | -1.07727700 | 2.17737300  |
| H  | 4.85879500  | -2.78684400 | 1.80454700  |
| H  | 3.54763900  | -1.71215600 | 2.36446700  |
| C  | 5.31948700  | -1.73302400 | -1.50704500 |
| H  | 6.32931800  | -1.40810600 | -1.21915700 |
| H  | 5.01338000  | -1.20193700 | -2.41866300 |
| H  | 5.32314100  | -2.81152000 | -1.71020500 |
| C  | 3.31593900  | 1.22804500  | 0.85899400  |
| C  | 3.83761900  | 2.64759100  | 0.92239100  |
| C  | 4.80254100  | 5.28110200  | 1.05383000  |
| C  | 3.64764200  | 3.41743800  | 2.08072900  |
| C  | 4.54693200  | 3.19674300  | -0.15346300 |
| C  | 5.02400100  | 4.50768900  | -0.08835800 |
| C  | 4.12065000  | 4.72872900  | 2.14191700  |
| H  | 3.13759400  | 2.99110000  | 2.94590000  |
| H  | 4.74951800  | 2.58163000  | -1.02996600 |
| H  | 5.57945200  | 4.92352000  | -0.93192000 |
| H  | 3.96516600  | 5.31703900  | 3.04877500  |
| H  | 5.17553500  | 6.30639600  | 1.10341800  |
| O  | 3.88038300  | 0.49903800  | -0.18506300 |
| H  | 3.47869800  | 0.75533400  | 1.84695300  |

---

**Sn/P-Prod**

---

|   |             |             |              |
|---|-------------|-------------|--------------|
| C | -0.51320000 | -0.77703000 | 1.38033500   |
| H | -1.04898800 | 0.12089000  | 1.70757500   |
| C | 0.90171500  | -0.52613300 | 0.80525500   |
| C | 1.21520400  | -1.66766000 | 0.07266100   |
| C | -0.39357500 | -1.87756800 | 2.47170800   |
| H | -1.35652700 | -2.01904400 | 2.98481600   |
| H | 0.35482800  | -1.62517800 | 3.23536900   |
| C | -0.00166300 | -3.13098300 | 1.63971900   |
| H | 0.97152900  | -3.55154300 | 1.92545600   |
| H | -0.74598700 | -3.93443200 | 1.73684000   |
| C | 0.00065400  | -2.59438900 | 0.17225100   |
| H | -0.03342800 | -3.37366300 | -0.59591700  |
| C | -1.14864000 | -1.57377100 | 0.22438300   |
| H | -1.24608500 | -0.98253900 | -0.69692600  |
| H | -2.11868000 | -2.02697500 | 0.48011600   |
| N | 2.34731300  | -2.05101700 | -0.56301300  |
| P | 1.50672000  | 1.12689200  | 0.69464800   |
| C | 0.80493000  | 2.09016900  | 2.05269100   |
| C | 0.03738300  | 3.64507400  | 4.24613800   |
| C | 0.75570800  | 1.52100600  | 3.33647100   |
| C | 0.48146900  | 3.44370300  | 1.87439400   |
| C | 0.09199900  | 4.21421700  | 2.97125400   |
| C | 0.37166700  | 2.29867200  | 4.42866500   |
| H | 1.01823500  | 0.47202400  | 3.48171900   |
| H | 0.54759800  | 3.90101500  | 0.88668600   |
| H | -0.16105200 | 5.26668500  | 2.82878000   |
| H | 0.33061000  | 1.85310700  | 5.42475000   |
| H | -0.26572700 | 4.25181800  | 5.10220000   |
| C | 0.95909600  | 1.86401600  | -0.87168800  |
| C | -0.01076900 | 2.88878600  | -3.28871500  |
| C | 1.83728200  | 2.08006700  | -1.94383700  |
| C | -0.41315000 | 2.13670400  | - 1.02444400 |



|    |             |             |              |
|----|-------------|-------------|--------------|
| C  | -0.89281100 | 2.64804700  | -2.22928500  |
| C  | 1.34816300  | 2.60194900  | -3.14413900  |
| H  | 2.88918600  | 1.82313700  | -1.84432100  |
| H  | -1.10668100 | 1.95939800  | -0.19985200  |
| H  | -1.95741200 | 2.86368600  | -2.34110000  |
| H  | 2.03658300  | 2.78393400  | -3.97190000  |
| H  | -0.38670200 | 3.29687200  | -4.22939200  |
| C  | 2.29556500  | -3.07511500 | -1.57726800  |
| C  | 2.28741800  | -5.00896100 | -3.58954000  |
| C  | 1.95243500  | -2.69984300 | -2.89620100  |
| C  | 2.65155600  | -4.40529100 | -1.26011400  |
| C  | 2.64219900  | -5.35804300 | -2.28778600  |
| C  | 1.94599800  | -3.69074000 | -3.88682300  |
| H  | 2.91207900  | -6.39221000 | -2.06441200  |
| H  | 1.67476600  | -3.42433000 | -4.91040000  |
| H  | 2.28005400  | -5.76684900 | -4.37588800  |
| C  | 1.60014700  | -1.26460100 | -3.25671700  |
| H  | 1.78585000  | -0.64298100 | -2.37178700  |
| C  | 2.49197900  | -0.72623300 | -4.38407100  |
| H  | 3.55893800  | -0.79567000 | -4.12020200  |
| H  | 2.25710700  | 0.32932200  | -4.58566800  |
| H  | 2.34474900  | -1.28134100 | -5.32330300  |
| C  | 0.11076900  | -1.12196200 | -3.60412000  |
| H  | -0.52630200 | -1.50468900 | -2.79300300  |
| H  | -0.14213600 | -1.68301700 | -4.51786500  |
| H  | -0.14619600 | -0.06465900 | -3.77029600  |
| C  | 3.05236600  | -4.82201100 | 0.14786900   |
| H  | 2.87380000  | -3.96172500 | 0.80935200   |
| C  | 4.54859400  | -5.16815200 | 0.22153200   |
| H  | 5.18226000  | -4.34042100 | -0.13721400  |
| H  | 4.78482000  | -6.04210700 | -0.40495200  |
| H  | 4.84844900  | -5.40536600 | 1.25460300   |
| C  | 2.19363100  | -5.98019100 | 0.67591700   |
| H  | 1.12126300  | -5.74381800 | 0.61356400   |
| H  | 2.43713500  | -6.19319100 | 1.72863200   |
| H  | 2.36612000  | -6.90460100 | 0.10360500   |
| Sn | 4.28522100  | -1.35816600 | - 0.11177200 |

|   |            |             |             |
|---|------------|-------------|-------------|
| C | 4.61269200 | -1.81079200 | 1.96376300  |
| H | 5.28804100 | -1.06647500 | 2.40753200  |
| H | 5.05605100 | -2.81088900 | 2.04986200  |
| H | 3.64014700 | -1.79211300 | 2.47409500  |
| C | 5.51469700 | -1.80150900 | -1.80007400 |
| H | 6.49419100 | -2.17593000 | -1.47593100 |
| H | 5.63741200 | -0.87121900 | -2.37108100 |
| H | 5.00081000 | -2.55674000 | -2.40899600 |
| C | 3.38669000 | 1.30156300  | 0.87866700  |
| C | 3.81567300 | 2.74646400  | 1.01922300  |
| C | 4.58371700 | 5.43315700  | 1.29742800  |
| C | 3.68743500 | 3.39965400  | 2.25469600  |
| C | 4.36077400 | 3.44345800  | -0.06663300 |
| C | 4.73996100 | 4.78040800  | 0.07183000  |
| C | 4.06338300 | 4.73605100  | 2.39159800  |
| H | 3.29216000 | 2.86168800  | 3.11856600  |
| H | 4.51239100 | 2.92721000  | -1.01345700 |
| H | 5.16729100 | 5.31248900  | -0.78097300 |
| H | 3.95684900 | 5.23154500  | 3.35895800  |
| H | 4.88097300 | 6.47869300  | 1.40414800  |
| O | 4.01141800 | 0.65221500  | -0.17632800 |
| H | 3.54573600 | 0.80425300  | 1.85737100  |

---

**Pb/P-Prod**

---

|   |             |             |            |
|---|-------------|-------------|------------|
| C | -0.47717800 | -0.76971600 | 1.40686000 |
| H | -0.99869000 | 0.13132200  | 1.74733300 |
| C | 0.93254100  | -0.53061500 | 0.81324100 |
| C | 1.21966800  | -1.67152100 | 0.06167300 |
| C | -0.35557900 | -1.87888700 | 2.48833400 |
| H | -1.31185500 | -2.01339400 | 3.01585400 |
| H | 0.40811600  | -1.64082000 | 3.24174400 |
| C | 0.00778800  | -3.13089100 | 1.64084100 |
| H | 0.97986600  | -3.56540600 | 1.90876300 |

|   |             |             |              |
|---|-------------|-------------|--------------|
| H | -0.74448500 | -3.92616000 | 1.74492900   |
| C | -0.00655600 | -2.58441700 | 0.17749000   |
| H | -0.06238900 | -3.35832300 | -0.59530300  |
| C | -1.14147600 | -1.55008000 | 0.25604200   |
| H | -1.24716900 | -0.95023200 | -0.65858900  |
| H | -2.11303400 | -1.99318400 | 0.52418400   |
| N | 2.32783300  | -2.05900900 | -0.59686700  |
| P | 1.54814400  | 1.11626300  | 0.68248400   |
| C | 0.83879100  | 2.09993900  | 2.02409500   |
| C | 0.06897400  | 3.69028100  | 4.19261300   |
| C | 0.77307600  | 1.54813600  | 3.31456500   |
| C | 0.53134300  | 3.45460800  | 1.82763400   |
| C | 0.14096200  | 4.24281700  | 2.91135100   |
| C | 0.38775500  | 2.34301800  | 4.39397300   |
| H | 1.02382800  | 0.49856200  | 3.47529400   |
| H | 0.61261300  | 3.89973000  | 0.83546100   |
| H | -0.09860300 | 5.29627200  | 2.75367500   |
| H | 0.33358800  | 1.90992100  | 5.39497200   |
| H | -0.23502600 | 4.31063800  | 5.03855700   |
| C | 1.01064900  | 1.83917000  | -0.89621600  |
| C | 0.06038100  | 2.84687700  | -3.32891100  |
| C | 1.89501600  | 2.03466300  | -1.96748300  |
| C | -0.35811700 | 2.12270500  | -1.05834100  |
| C | -0.82808900 | 2.62590100  | -2.27051100  |
| C | 1.41582400  | 2.54816800  | -3.17555100  |
| H | 2.94407900  | 1.76835300  | -1.85614300  |
| H | -1.05638800 | 1.96076900  | -0.23452200  |
| H | -1.89012400 | 2.85062200  | -2.38902700  |
| H | 2.10929400  | 2.71503100  | -4.00236500  |
| H | -0.30784700 | 3.24864900  | -4.27536900  |
| C | 2.28130900  | -3.08894700 | -1.59492700  |
| C | 2.31304700  | -5.04002400 | -3.59639600  |
| C | 1.95584600  | -2.72736600 | -2.92421000  |
| C | 2.64479900  | -4.41623800 | -1.26757300  |
| C | 2.65413200  | -5.37670700 | -2.28785800  |
| C | 1.96802500  | -3.72561200 | -3.90715100  |
| H | 2.92810300  | -6.40748700 | - 2.05356400 |

|    |             |             |             |
|----|-------------|-------------|-------------|
| H  | 1.70817300  | -3.46860300 | -4.93588400 |
| H  | 2.31973200  | -5.80361700 | -4.37719600 |
| C  | 1.59390700  | -1.29712800 | -3.29368300 |
| H  | 1.84166000  | -0.66199900 | -2.43337000 |
| C  | 2.40594500  | -0.78247300 | -4.48946500 |
| H  | 3.48915500  | -0.86395700 | -4.30783100 |
| H  | 2.17071800  | 0.27480400  | -4.68069200 |
| H  | 2.17996900  | -1.33934400 | -5.41182600 |
| C  | 0.08494700  | -1.15312600 | -3.54416800 |
| H  | -0.49854300 | -1.51137800 | -2.68373300 |
| H  | -0.22827400 | -1.73738900 | -4.42426100 |
| H  | -0.17845700 | -0.09905400 | -3.72010000 |
| C  | 3.03552000  | -4.82045800 | 0.14689100  |
| H  | 2.84607400  | -3.95562600 | 0.79933100  |
| C  | 4.53250600  | -5.15993500 | 0.23732000  |
| H  | 5.16801900  | -4.33336600 | -0.12399900 |
| H  | 4.77927800  | -6.03714000 | -0.38035900 |
| H  | 4.82573700  | -5.38753700 | 1.27457700  |
| C  | 2.17872100  | -5.97906600 | 0.67703000  |
| H  | 1.10611200  | -5.74779800 | 0.60351700  |
| H  | 2.41388000  | -6.18304500 | 1.73348400  |
| H  | 2.36038000  | -6.90672400 | 0.11289500  |
| Pb | 4.40799100  | -1.40257400 | -0.12528100 |
| C  | 4.55590500  | -1.81925800 | 2.07136600  |
| H  | 5.20621800  | -1.06235400 | 2.52588200  |
| H  | 4.97040100  | -2.82708300 | 2.18479200  |
| H  | 3.52914200  | -1.76046500 | 2.45159600  |
| C  | 5.50347300  | -1.75555100 | -2.02947800 |
| H  | 6.47658600  | -2.20632000 | -1.80494200 |
| H  | 5.60683300  | -0.76689700 | -2.49212700 |
| H  | 4.86660000  | -2.42417600 | -2.62059300 |
| C  | 3.43212600  | 1.31855300  | 0.87853900  |
| C  | 3.81173000  | 2.77174100  | 1.07522900  |
| C  | 4.46980300  | 5.47502800  | 1.45868600  |
| C  | 3.72744000  | 3.35218400  | 2.34970300  |
| C  | 4.25622300  | 3.55203500  | 0.00023000  |
| C  | 4.58037500  | 4.89704000  | 0.19111200  |

|   |            |            |             |
|---|------------|------------|-------------|
| C | 4.04920900 | 4.69598200 | 2.54039300  |
| H | 3.40177400 | 2.75108000 | 3.20129200  |
| H | 4.36935600 | 3.09698700 | -0.98239300 |
| H | 4.92799900 | 5.49498800 | -0.65427700 |
| H | 3.97638100 | 5.13398600 | 3.53814700  |
| H | 4.72382300 | 6.52703300 | 1.60611700  |
| O | 4.08664900 | 0.72438900 | -0.18192900 |
| H | 3.58671700 | 0.80073100 | 1.84860500  |

---

### Si/N-Prod

---

|   |             |             |             |
|---|-------------|-------------|-------------|
| C | -0.53190100 | -0.47404100 | 1.25341300  |
| H | -1.10762400 | 0.41962700  | 1.51168900  |
| C | 0.87360600  | -0.21308500 | 0.68019900  |
| C | 1.26806400  | -1.37106500 | 0.05528500  |
| C | -0.43414600 | -1.50684300 | 2.42066000  |
| H | -1.42858800 | -1.64831400 | 2.86862400  |
| H | 0.23926400  | -1.19397400 | 3.22720400  |
| C | 0.05392200  | -2.79115800 | 1.70070600  |
| H | 1.03808000  | -3.13073300 | 2.04907000  |
| H | -0.64704100 | -3.62796800 | 1.83163200  |
| C | 0.08979700  | -2.34627200 | 0.20894300  |
| H | 0.11778500  | -3.16991500 | -0.51129400 |
| C | -1.10488200 | -1.38075600 | 0.14613900  |
| H | -1.19763800 | -0.86691300 | -0.81990400 |
| H | -2.06242900 | -1.85249300 | 0.41336400  |
| N | 2.43414500  | -1.79977600 | -0.55047600 |
| N | 1.41713000  | 1.18659200  | 0.60114400  |
| C | 0.94474600  | 2.03722000  | 1.73995500  |
| C | 0.33661000  | 3.64602700  | 3.93873300  |
| C | 0.95321700  | 1.49267400  | 3.02315500  |
| C | 0.67251300  | 3.39254900  | 1.54968200  |
| C | 0.36274800  | 4.18992000  | 2.65292700  |
| C | 0.63903200  | 2.29499800  | 4.12120300  |

|   |             |             |             |
|---|-------------|-------------|-------------|
| H | 1.20940600  | 0.44663100  | 3.17257100  |
| H | 0.72246700  | 3.84019700  | 0.56001400  |
| H | 0.15020300  | 5.24954700  | 2.49955900  |
| H | 0.63545600  | 1.85788500  | 5.12163500  |
| H | 0.08966700  | 4.27469300  | 4.79641200  |
| C | 0.93111500  | 1.71911900  | -0.72331100 |
| C | -0.11177300 | 2.67347000  | -3.14388500 |
| C | 1.77080500  | 1.88944700  | -1.82228300 |
| C | -0.43896900 | 1.99427600  | -0.84321700 |
| C | -0.95463900 | 2.46666400  | -2.04703500 |
| C | 1.24415600  | 2.38137300  | -3.02284900 |
| H | 2.81817000  | 1.62234200  | -1.76956100 |
| H | -1.10603600 | 1.86315800  | 0.00533400  |
| H | -2.02224800 | 2.68210800  | -2.12228400 |
| H | 1.91569900  | 2.52764600  | -3.87074400 |
| H | -0.51377100 | 3.05496900  | -4.08435600 |
| C | 2.38210700  | -2.90489300 | -1.49398500 |
| C | 2.37687300  | -4.98515100 | -3.36145800 |
| C | 2.00734600  | -2.63896500 | -2.83088200 |
| C | 2.74145800  | -4.20836200 | -1.08254800 |
| C | 2.73862700  | -5.23238100 | -2.04002600 |
| C | 2.00775900  | -3.69875700 | -3.74684200 |
| H | 3.01732100  | -6.24472400 | -1.74107800 |
| H | 1.71629400  | -3.51145700 | -4.78215600 |
| H | 2.37778900  | -5.79768000 | -4.09125500 |
| C | 1.58066800  | -1.25674200 | -3.29602400 |
| H | 1.74187800  | -0.56151600 | -2.46437200 |
| C | 2.42077800  | -0.75978800 | -4.48042700 |
| H | 3.49467800  | -0.74330800 | -4.23812500 |
| H | 2.11816200  | 0.25898900  | -4.76532900 |
| H | 2.29253100  | -1.39820100 | -5.36788500 |
| C | 0.08162200  | -1.22492800 | -3.63272600 |
| H | -0.52488400 | -1.59662600 | -2.79413500 |
| H | -0.14406400 | -1.85354500 | -4.50862900 |
| H | -0.24095700 | -0.19725800 | -3.85931700 |
| C | 3.11043400  | -4.55091700 | 0.35309700  |
| H | 2.97802000  | -3.64216100 | 0.95556400  |

|    |            |             |             |
|----|------------|-------------|-------------|
| C  | 4.57903400 | -4.98887700 | 0.47025100  |
| H  | 5.26679800 | -4.23815100 | 0.05200300  |
| H  | 4.75640400 | -5.92914100 | -0.07425800 |
| H  | 4.85448100 | -5.15810700 | 1.52325900  |
| C  | 2.17683300 | -5.62298900 | 0.93752300  |
| H  | 1.11987500 | -5.33856800 | 0.83371600  |
| H  | 2.38725900 | -5.77606300 | 2.00773200  |
| H  | 2.31178000 | -6.59165900 | 0.43239600  |
| Si | 4.00930100 | -1.09688600 | -0.17624400 |
| C  | 4.58360100 | -1.51419500 | 1.55262700  |
| H  | 5.32954300 | -0.77888400 | 1.89554700  |
| H  | 5.05752100 | -2.50517700 | 1.57454000  |
| H  | 3.75152100 | -1.53052300 | 2.27338000  |
| C  | 5.22049500 | -1.42537100 | -1.53281200 |
| H  | 6.18477900 | -0.94531400 | -1.30457700 |
| H  | 4.84666700 | -1.02948500 | -2.48829800 |
| H  | 5.38941000 | -2.50472000 | -1.65950100 |
| C  | 3.08159100 | 1.23067200  | 0.83464700  |
| C  | 3.59872200 | 2.62464300  | 1.06292600  |
| C  | 4.61752700 | 5.18423500  | 1.61098300  |
| C  | 3.81271700 | 3.04206800  | 2.38570800  |
| C  | 3.94127000 | 3.49118100  | 0.01454500  |
| C  | 4.43831900 | 4.76562900  | 0.28932800  |
| C  | 4.31408500 | 4.31348300  | 2.66041100  |
| H  | 3.57466100 | 2.37004500  | 3.21173300  |
| H  | 3.83179500 | 3.17782100  | -1.02055100 |
| H  | 4.69635300 | 5.43288400  | -0.53573500 |
| H  | 4.47006100 | 4.62280800  | 3.69586600  |
| H  | 5.00745800 | 6.18251100  | 1.82133000  |
| O  | 3.70102100 | 0.58268400  | -0.17420300 |
| H  | 3.09619300 | 0.67432900  | 1.78109300  |

---

Si/As-Prod

---

|    |             |             |              |
|----|-------------|-------------|--------------|
| C  | -0.56546600 | -1.01870200 | 1.42161000   |
| H  | -1.17514900 | -0.16032000 | 1.72980900   |
| C  | 0.79680200  | -0.66959400 | 0.80213600   |
| C  | 1.22341500  | -1.78420900 | 0.11416300   |
| C  | -0.31276100 | -2.06220100 | 2.54890400   |
| H  | -1.24427500 | -2.27460800 | 3.09419400   |
| H  | 0.42657000  | -1.70902500 | 3.28119600   |
| C  | 0.17955700  | -3.30292700 | 1.75200100   |
| H  | 1.19093100  | -3.62244400 | 2.03474700   |
| H  | -0.48658300 | -4.16616400 | 1.89128200   |
| C  | 0.10871800  | -2.82223600 | 0.26456500   |
| H  | 0.13531900  | -3.62507900 | -0.47876200  |
| C  | -1.13987100 | -1.92218000 | 0.31076900   |
| H  | -1.32119200 | -1.38226200 | -0.62885200  |
| H  | -2.05104800 | -2.46189400 | 0.60991800   |
| N  | 2.41541300  | -2.06377200 | -0.50791600  |
| As | 1.41790500  | 1.10269300  | 0.73878300   |
| C  | 0.64729300  | 2.08178600  | 2.19457000   |
| C  | -0.25823300 | 3.56317900  | 4.37525000   |
| C  | 0.60933000  | 1.49369000  | 3.46774000   |
| C  | 0.24107600  | 3.41050900  | 2.00977400   |
| C  | -0.21539600 | 4.14664000  | 3.10549600   |
| C  | 0.15408600  | 2.23849100  | 4.55685600   |
| H  | 0.92851000  | 0.45943100  | 3.61102700   |
| H  | 0.28513300  | 3.87188400  | 1.02179100   |
| H  | -0.53610200 | 5.18113300  | 2.96617700   |
| H  | 0.11885900  | 1.78371000  | 5.54904500   |
| H  | -0.61542200 | 4.14298600  | 5.22907700   |
| C  | 0.82665800  | 1.93105800  | -0.89503100  |
| C  | -0.13433900 | 3.08654400  | -3.24319400  |
| C  | 1.72865100  | 2.33799400  | -1.88476700  |
| C  | -0.55630400 | 2.08446300  | -1.08095700  |
| C  | -1.03280000 | 2.66538100  | -2.25652200  |
| C  | 1.24038100  | 2.92001700  | -3.05795200  |
| H  | 2.79955000  | 2.20472700  | -1.75038100  |
| H  | -1.26185300 | 1.75919400  | -0.31271300  |
| H  | -2.10774900 | 2.78949100  | - 2.40321900 |



|    |             |             |              |
|----|-------------|-------------|--------------|
| H  | 1.94124900  | 3.24558600  | -3.82940800  |
| H  | -0.50956700 | 3.54345600  | -4.16138600  |
| C  | 2.41359100  | -3.01608600 | -1.60619800  |
| C  | 2.47462200  | -4.78156800 | -3.76082400  |
| C  | 2.16629000  | -2.52469000 | -2.90714900  |
| C  | 2.70268200  | -4.37748300 | -1.37113300  |
| C  | 2.72826900  | -5.24504100 | -2.47191400  |
| C  | 2.19510500  | -3.43280400 | -3.97324400  |
| H  | 2.94861400  | -6.30293800 | -2.31574500  |
| H  | 2.00010500  | -3.07893700 | -4.98706800  |
| H  | 2.49685800  | -5.47454700 | -4.60475500  |
| C  | 1.84955400  | -1.05805200 | -3.16265700  |
| H  | 2.14545100  | -0.49213800 | -2.26904400  |
| C  | 2.63592500  | -0.47515700 | -4.34346100  |
| H  | 3.71942100  | -0.63290100 | -4.22632100  |
| H  | 2.45316000  | 0.60732700  | -4.42038500  |
| H  | 2.33494500  | -0.92401700 | -5.30247700  |
| C  | 0.33809700  | -0.85552100 | -3.34981200  |
| H  | -0.22345800 | -1.22321100 | -2.47901500  |
| H  | -0.02369900 | -1.40285300 | -4.23474500  |
| H  | 0.10023800  | 0.20979300  | -3.48384400  |
| C  | 2.98096900  | -4.92888000 | 0.02011900   |
| H  | 2.82243700  | -4.11091200 | 0.73540100   |
| C  | 4.43740400  | -5.39746500 | 0.16785100   |
| H  | 5.15287500  | -4.59023000 | -0.04856100  |
| H  | 4.66071900  | -6.22729000 | -0.52057500  |
| H  | 4.62810200  | -5.75399400 | 1.19249500   |
| C  | 2.00968900  | -6.05959500 | 0.39307900   |
| H  | 0.96107500  | -5.75171100 | 0.27182500   |
| H  | 2.15737400  | -6.36429700 | 1.44098100   |
| H  | 2.16932200  | -6.94960200 | -0.23487600  |
| Si | 3.99294800  | -1.37230600 | -0.03933000  |
| C  | 4.35802800  | -1.85486700 | 1.72725900   |
| H  | 5.17922100  | -1.25267800 | 2.14759900   |
| H  | 4.66150800  | -2.91153800 | 1.77077700   |
| H  | 3.47164000  | -1.73725500 | 2.37002500   |
| C  | 5.26015300  | -1.81580500 | - 1.31382400 |

|   |            |             |             |
|---|------------|-------------|-------------|
| H | 6.24024900 | -1.41587800 | -1.00998200 |
| H | 4.98883600 | -1.37078000 | -2.28271700 |
| H | 5.35049700 | -2.90083200 | -1.45647300 |
| C | 3.41771900 | 1.15554400  | 0.88902000  |
| C | 3.97395300 | 2.55328500  | 0.81761300  |
| C | 4.99433700 | 5.16215700  | 0.69501000  |
| C | 3.71765800 | 3.46319600  | 1.85535900  |
| C | 4.76698500 | 2.95015300  | -0.26661700 |
| C | 5.27372500 | 4.25039900  | -0.32620000 |
| C | 4.22032600 | 4.76313500  | 1.78913900  |
| H | 3.13132200 | 3.15646800  | 2.72364900  |
| H | 4.99945700 | 2.22696000  | -1.04911900 |
| H | 5.89606700 | 4.55017700  | -1.17225100 |
| H | 4.01532700 | 5.46424800  | 2.60101200  |
| H | 5.39056000 | 6.17865800  | 0.64625200  |
| O | 3.89837800 | 0.32310300  | -0.10834500 |
| H | 3.57529900 | 0.74332200  | 1.90217900  |

---

#### Si/Sb-Prod

---

|   |             |             |             |
|---|-------------|-------------|-------------|
| C | -0.81602200 | -1.07680400 | 1.06697400  |
| H | -1.44609600 | -0.20128700 | 1.27288500  |
| C | 0.62104500  | -0.76860700 | 0.63153400  |
| C | 1.12276700  | -1.89815700 | 0.03783600  |
| C | -0.73372400 | -2.09873200 | 2.23837400  |
| H | -1.73286100 | -2.28761000 | 2.65830400  |
| H | -0.09622500 | -1.72933700 | 3.05382700  |
| C | -0.15930000 | -3.36365700 | 1.53795400  |
| H | 0.80178800  | -3.69091900 | 1.95680200  |
| H | -0.85197500 | -4.21469400 | 1.60476800  |
| C | -0.02274300 | -2.91345900 | 0.04525200  |
| H | 0.08793500  | -3.72925100 | -0.67537200 |
| C | -1.24910800 | -1.99485400 | -0.09627100 |
| H | -1.28997800 | -1.47891300 | -1.06642500 |

|    |             |             |              |
|----|-------------|-------------|--------------|
| H  | -2.20292000 | -2.51259000 | 0.08574200   |
| N  | 2.38801400  | -2.22017200 | -0.40326500  |
| Sb | 1.41811800  | 1.13511100  | 0.86608100   |
| C  | 0.67057700  | 1.97721600  | 2.66594100   |
| C  | -0.26889400 | 3.06248500  | 5.05529600   |
| C  | 0.92944800  | 1.31961200  | 3.87785200   |
| C  | -0.05321400 | 3.17651100  | 2.64420100   |
| C  | -0.52274900 | 3.71536000  | 3.84574300   |
| C  | 0.45538700  | 1.86580300  | 5.07243400   |
| H  | 1.49035000  | 0.38116800  | 3.89953800   |
| H  | -0.26053500 | 3.68716100  | 1.70123700   |
| H  | -1.09168600 | 4.64757500  | 3.83479300   |
| H  | 0.65014000  | 1.35564300  | 6.01825300   |
| H  | -0.63888700 | 3.48708100  | 5.99101600   |
| C  | 0.67777400  | 2.31755000  | -0.73289900  |
| C  | -0.28844800 | 3.82425400  | -2.86976300  |
| C  | 1.04941900  | 3.66513700  | -0.85526700  |
| C  | -0.16795100 | 1.72039300  | -1.67661800  |
| C  | -0.65282300 | 2.48052300  | -2.74435500  |
| C  | 0.56130300  | 4.41384400  | -1.92837100  |
| H  | 1.72254400  | 4.13406800  | -0.13558200  |
| H  | -0.44177100 | 0.66772600  | -1.58588400  |
| H  | -1.31532600 | 2.01977500  | -3.48024700  |
| H  | 0.85237100  | 5.46145800  | -2.03049100  |
| H  | -0.66712600 | 4.41505500  | -3.70669300  |
| C  | 2.49475900  | -3.12709300 | -1.53334300  |
| C  | 2.87094000  | -4.78570600 | -3.73816900  |
| C  | 2.39889800  | -2.57873000 | -2.83084800  |
| C  | 2.74560900  | -4.50111400 | -1.32305400  |
| C  | 2.93456100  | -5.31304000 | -2.44962700  |
| C  | 2.59654100  | -3.43215500 | -3.92456500  |
| H  | 3.13244000  | -6.37857300 | -2.31592200  |
| H  | 2.53719900  | -3.03094600 | -4.93844000  |
| H  | 3.02774100  | -5.43536600 | -4.60203100  |
| C  | 2.09668500  | -1.10338300 | -3.06813400  |
| H  | 1.89520300  | -0.63896000 | -2.09450000  |
| C  | 3.29635100  | -0.36173800 | - 3.67629500 |

|    |             |             |             |
|----|-------------|-------------|-------------|
| H  | 4.18255600  | -0.43404200 | -3.02851400 |
| H  | 3.05921900  | 0.70624900  | -3.80731900 |
| H  | 3.56566900  | -0.76913300 | -4.66326600 |
| C  | 0.83575900  | -0.92264300 | -3.92542800 |
| H  | -0.03458500 | -1.41306600 | -3.46151100 |
| H  | 0.96196000  | -1.35290100 | -4.93085600 |
| H  | 0.60604200  | 0.14631400  | -4.04921500 |
| C  | 2.77622500  | -5.12820300 | 0.06576800  |
| H  | 2.58615000  | -4.32579800 | 0.79247800  |
| C  | 4.13656500  | -5.75485700 | 0.40921300  |
| H  | 4.95174800  | -5.01767100 | 0.38443700  |
| H  | 4.39655000  | -6.56050100 | -0.29477000 |
| H  | 4.11254100  | -6.19332100 | 1.41912200  |
| C  | 1.66046900  | -6.17481300 | 0.22744000  |
| H  | 0.67316300  | -5.76604700 | -0.02939900 |
| H  | 1.61984500  | -6.53787600 | 1.26628300  |
| H  | 1.83725200  | -7.04610400 | -0.42206700 |
| Si | 3.91700100  | -1.57653400 | 0.23982300  |
| C  | 3.93261300  | -1.83411400 | 2.09046600  |
| H  | 4.75837700  | -1.28940300 | 2.57480800  |
| H  | 4.06819200  | -2.90572400 | 2.30547700  |
| H  | 2.98428500  | -1.52348600 | 2.55633000  |
| C  | 5.34714000  | -2.27353800 | -0.70666000 |
| H  | 6.28032800  | -1.84256600 | -0.31101500 |
| H  | 5.26635600  | -2.00446400 | -1.76966400 |
| H  | 5.40822500  | -3.36672400 | -0.64342800 |
| C  | 3.66130800  | 1.12689200  | 0.76332500  |
| C  | 4.05924300  | 2.47953000  | 0.26600800  |
| C  | 4.63789300  | 5.05687500  | -0.66431800 |
| C  | 4.12111700  | 3.55715600  | 1.16436700  |
| C  | 4.29261300  | 2.69746000  | -1.09805800 |
| C  | 4.58650700  | 3.98287100  | -1.55753100 |
| C  | 4.40586900  | 4.84159300  | 0.69925900  |
| H  | 3.94418200  | 3.39053600  | 2.23103800  |
| H  | 4.24022000  | 1.85604100  | -1.78919800 |
| H  | 4.77281600  | 4.14733600  | -2.62097300 |
| H  | 4.45852600  | 5.67511300  | 1.40292700  |

|   |            |            |             |
|---|------------|------------|-------------|
| H | 4.86704600 | 6.06109300 | -1.02726500 |
| O | 4.00817900 | 0.09607000 | -0.07315100 |
| H | 3.96678800 | 0.97313300 | 1.81196000  |

---

Si/Bi-Prod

---

|    |             |             |             |
|----|-------------|-------------|-------------|
| C  | -0.19905600 | -2.22881600 | 1.99599400  |
| H  | 0.79826400  | -2.32212700 | 2.44511300  |
| C  | -0.29618000 | -1.25761900 | 0.81522600  |
| C  | -1.61335400 | -0.93432700 | 0.66139200  |
| C  | -0.84343400 | -3.57511200 | 1.54928300  |
| H  | -0.70842200 | -4.34663500 | 2.32231700  |
| H  | -0.39938000 | -3.95522500 | 0.61820800  |
| C  | -2.33955800 | -3.18858600 | 1.37935200  |
| H  | -2.71146000 | -3.35371000 | 0.35999200  |
| H  | -2.98547100 | -3.76121700 | 2.06052000  |
| C  | -2.36236200 | -1.67713400 | 1.77681700  |
| H  | -3.35586300 | -1.27763400 | 2.00541200  |
| C  | -1.31183300 | -1.65917700 | 2.90119400  |
| H  | -1.08799500 | -0.64928000 | 3.27191700  |
| H  | -1.56892700 | -2.31526700 | 3.74703300  |
| N  | -2.30508700 | -0.18738300 | -0.29233800 |
| Bi | 1.53539800  | -0.60377700 | -0.26380900 |
| C  | 3.06267100  | -2.26838800 | -0.16180800 |
| C  | 5.03417900  | -4.24506300 | -0.20958900 |
| C  | 4.32478700  | -1.98164200 | -0.69955000 |
| C  | 2.77553600  | -3.54216800 | 0.33809200  |
| C  | 3.76970400  | -4.52823000 | 0.31506900  |
| C  | 5.31231000  | -2.97229500 | -0.71631800 |
| H  | 4.55291500  | -0.99448200 | -1.11267400 |
| H  | 1.79325500  | -3.78187800 | 0.74623300  |
| H  | 3.55044900  | -5.52362700 | 0.70874100  |
| H  | 6.29813400  | -2.74916900 | -1.13179500 |
| H  | 5.80409100  | -5.02011500 | -0.22873600 |

|    |             |             |              |
|----|-------------|-------------|--------------|
| C  | -3.57528200 | 0.40439500  | 0.10083200   |
| C  | -5.99833200 | 1.64763400  | 0.69649400   |
| C  | -3.56614900 | 1.65380000  | 0.75703100   |
| C  | -4.78414700 | -0.24669200 | -0.23445300  |
| C  | -5.98799100 | 0.40326900  | 0.06922100   |
| C  | -4.79655800 | 2.25941600  | 1.04633500   |
| H  | -6.93536100 | -0.07685700 | -0.18419600  |
| H  | -4.81431600 | 3.22789800  | 1.55057900   |
| H  | -6.94781100 | 2.13825000  | 0.92172900   |
| C  | -2.27403200 | 2.34800100  | 1.16671600   |
| H  | -1.43499700 | 1.72738500  | 0.82597100   |
| C  | -2.12164200 | 3.72263600  | 0.49954000   |
| H  | -2.10697200 | 3.63783900  | -0.59779000  |
| H  | -1.18164500 | 4.20149600  | 0.81711300   |
| H  | -2.94240700 | 4.40315500  | 0.77336000   |
| C  | -2.17316500 | 2.45697300  | 2.69595800   |
| H  | -2.23306100 | 1.46605200  | 3.17099300   |
| H  | -2.98502100 | 3.07461700  | 3.11048400   |
| H  | -1.21984400 | 2.92324500  | 2.98869400   |
| C  | -4.82533500 | -1.63558100 | -0.86056300  |
| H  | -3.78714600 | -1.98163100 | -0.96387500  |
| C  | -5.46012800 | -1.64545900 | -2.25992000  |
| H  | -4.90330100 | -1.02129500 | -2.97401100  |
| H  | -6.49643300 | -1.27427500 | -2.23378200  |
| H  | -5.48530300 | -2.67022900 | -2.66227400  |
| C  | -5.55656100 | -2.62879000 | 0.05889300   |
| H  | -5.15069900 | -2.61348900 | 1.08002000   |
| H  | -5.46566400 | -3.65473400 | -0.33066600  |
| H  | -6.62998200 | -2.39277300 | 0.12435500   |
| Si | -1.78913200 | 0.21386700  | -1.92209100  |
| C  | -1.22186000 | -1.30479600 | -2.84325900  |
| H  | -0.63355100 | -1.06596800 | -3.74328000  |
| H  | -2.12141000 | -1.84813900 | -3.17642200  |
| H  | -0.64220200 | -1.99233500 | -2.20984100  |
| C  | -3.02764500 | 1.28073900  | -2.79059200  |
| H  | -2.64006600 | 1.54519300  | -3.78752200  |
| H  | -3.19346800 | 2.20795500  | - 2.22341300 |

|   |             |            |             |
|---|-------------|------------|-------------|
| H | -3.99864700 | 0.78466600 | -2.91132400 |
| C | 0.82574600  | 1.16766200 | -2.12241300 |
| C | 1.76883400  | 2.22538000 | -1.80087500 |
| C | 3.64260200  | 4.18687400 | -1.12545500 |
| C | 3.05281300  | 2.20791300 | -2.38457100 |
| C | 1.43507800  | 3.23224000 | -0.87345300 |
| C | 2.37148100  | 4.20864600 | -0.54269100 |
| C | 3.98220100  | 3.18592600 | -2.04884900 |
| H | 3.31566500  | 1.42036200 | -3.09772200 |
| H | 0.44361000  | 3.23646600 | -0.42414500 |
| H | 2.11347300  | 4.98633600 | 0.17933900  |
| H | 4.97375500  | 3.17664200 | -2.50598500 |
| H | 4.37629100  | 4.95148500 | -0.85992200 |
| O | -0.43288600 | 1.31051300 | -1.77543000 |
| C | 2.30316400  | 0.85862500 | 1.26551300  |
| C | 3.63764700  | 1.27799800 | 1.23560000  |
| C | 1.39536900  | 1.45003000 | 2.15178600  |
| C | 4.06331800  | 2.29334300 | 2.09673900  |
| H | 4.35642800  | 0.82325300 | 0.54978900  |
| C | 1.82846600  | 2.46116800 | 3.01578600  |
| H | 0.35487800  | 1.11983000 | 2.17662800  |
| C | 3.15954900  | 2.88717500 | 2.98383800  |
| H | 5.10583700  | 2.61980700 | 2.07655000  |
| H | 1.12485300  | 2.91392100 | 3.71884500  |
| H | 3.49614900  | 3.67793700 | 3.65812700  |
| H | 1.05214800  | 0.52541900 | -2.98349700 |

---
